# Supplementary material for: Nazarov cyclisations initiated by DDQ-oxidised pentadienyl ether: a mechanistic investigation from the DFT perspective
Source: Royal Society of Chemistry journal article supplement (doi:10.1039/c8ob02590h), 2018-01-01
Supplement: c8ob02590h1.pdf [file c8ob02590h1.pdf]

# Nazarov cyclizations initiated by DDQ-oxidised pentadienyl ether: A mechanistic investigation from the DFT perspective

Ali Gouranourimi, Antony Chipman, Rasool Babaahmadi, Angus Olding, Brian Yates\*,  
Alireza Ariafard\*

School of Natural Sciences – Chemistry, University of Tasmania, Private Bag 75, Hobart,  
Tasmania 7001, Australia

E-mail: [Brian.Yates@utas.edu.au](mailto:Brian.Yates@utas.edu.au)

[Alireza.Ariafard@utas.edu.au](mailto:Alireza.Ariafard@utas.edu.au)

## CONTENTS:

- **Table S1.** Relative Gibbs free energy (kcal/mol) of transition structures **TS\_A**, **TS\_B**, and **TS\_D** and intermediates **2\_D** and **2\_A** calculated at the **M06-2X-D3** and **B3LYP-D3** levels for cases where the pentadienyl ether is substituted by a variety of R groups (page ESI2).
- **Scheme ESI1.** Energy profile for the reaction between pentadienyl ether (**sub\_1** when **X=Me**) and DDQ through pathways A, B, and D. The relative Gibbs and potential energies (in parentheses) obtained from M06-2X/6-311+G(2d,p)//B3LYP/6-31G(d) calculations are given in kcal/mol (page ESI3).
- Cartesian coordinates and total energies for all the calculated structures in CH<sub>2</sub>Cl<sub>2</sub> (page ESI4).

**Table S1** Relative Gibbs free energy (kcal/mol) of transition structures **TS\_A**, **TS\_B**, and **TS\_D** and intermediates **2\_D** and **2\_A** calculated at the **M06-2X-D3** (Table S1a) and **B3LYP-D3** (Table S1b) levels for cases where the pentadienyl ether is substituted by a variety of R groups.

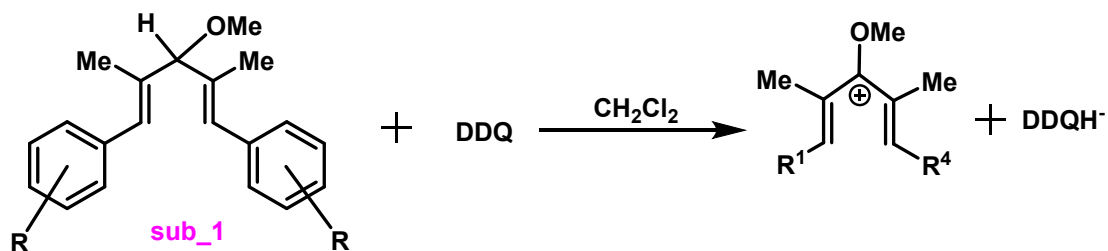

| Entry | R-Ph                      | $\Delta G$ (kcal/mol) <b>M06-2X-D3</b> |        |        |       |       |
|-------|---------------------------|----------------------------------------|--------|--------|-------|-------|
|       |                           | (TS_A)                                 | (TS_B) | (TS_D) | (2_D) | (2_A) |
| 1     | para-CN-Ph                | 24.2                                   | 29.5   | 35.1   | 33.8  | -16.1 |
| 2     | para-Cl-Ph                | 21.6                                   | 27.4   | 32.7   | 27.9  | -16.9 |
| 3     | Ph                        | 19.7                                   | 26.3   | 32.0   | 25.7  | -16.2 |
| 4     | para-Me-Ph                | 19.0                                   | 25.5   | 30.0   | 24.1  | -17.1 |
| 5     | para-OMe-Ph               | 17.0                                   | 23.9   | 28.4   | 18.2  | -17.5 |
| 6     | para-NH <sub>2</sub> -Ph  | 14.0                                   | 22.1   | 25.9   | 9.6   | -18.0 |
| 7     | para-NMe <sub>2</sub> -Ph | 11.4                                   | 20.4   | 22.4   | 7.8   | -19.3 |
| 8     | meta-CN-Ph                | 27.0                                   | 37.9   | 38.2   | 39.9  | -15.4 |
| 9     | meta-OMe-Ph               | 20.1                                   | 26.9   | 32.0   | 25.1  | -16.5 |
| 10    | meta-Me-Ph                | 18.5                                   | 24.9   | 30.1   | 25.3  | -17.8 |

(S1b)

| Entry | R-Ph                      | $\Delta G$ (kcal/mol) <b>B3LYP-D3</b> |        |        |       |       |
|-------|---------------------------|---------------------------------------|--------|--------|-------|-------|
|       |                           | (TS_A)                                | (TS_B) | (TS_D) | (2_D) | (2_A) |
| 1     | para-CN-Ph                | 14.3                                  | 23.0   | 25.7   | 22.2  | -7.6  |
| 2     | para-Cl-Ph                | 11.1                                  | 20.5   | 23.4   | 16.0  | -8.6  |
| 3     | Ph                        | 9.6                                   | 19.4   | 23.0   | 14.4  | -8.9  |
| 4     | para-Me-Ph                | 8.5                                   | 18.3   | 21.0   | 12.2  | -9.0  |
| 5     | para-OMe-Ph               | 5.8                                   | 16.2   | 19.3   | 6.7   | -9.7  |
| 6     | para-NH <sub>2</sub> -Ph  | 2.0                                   | 13.5   | 16.7   | -1.0  | -10.1 |
| 7     | para-NMe <sub>2</sub> -Ph | -1.4                                  | 11.6   | 12.9   | -5.1  | -11.5 |
| 8     | meta-CN-Ph                | 16.9                                  | 24.7   | 28.7   | 27.2  | -7.0  |
| 9     | meta-OMe-Ph               | 9.0                                   | 19.7   | 22.6   | 13.1  | -8.4  |
| 10    | meta-Me-Ph                | 7.7                                   | 17.7   | 21.8   | 13.2  | -9.6  |

**Scheme ESII** Energy profile for the reaction between pentadienyl ether (**sub\_1** when X=Me) and DDQ through pathways A, B, and D. The relative Gibbs and potential energies (in parentheses) obtained from M06-2X/6-311+G(2d,p)//B3LYP/6-31G(d) calculations are given in kcal/mol.

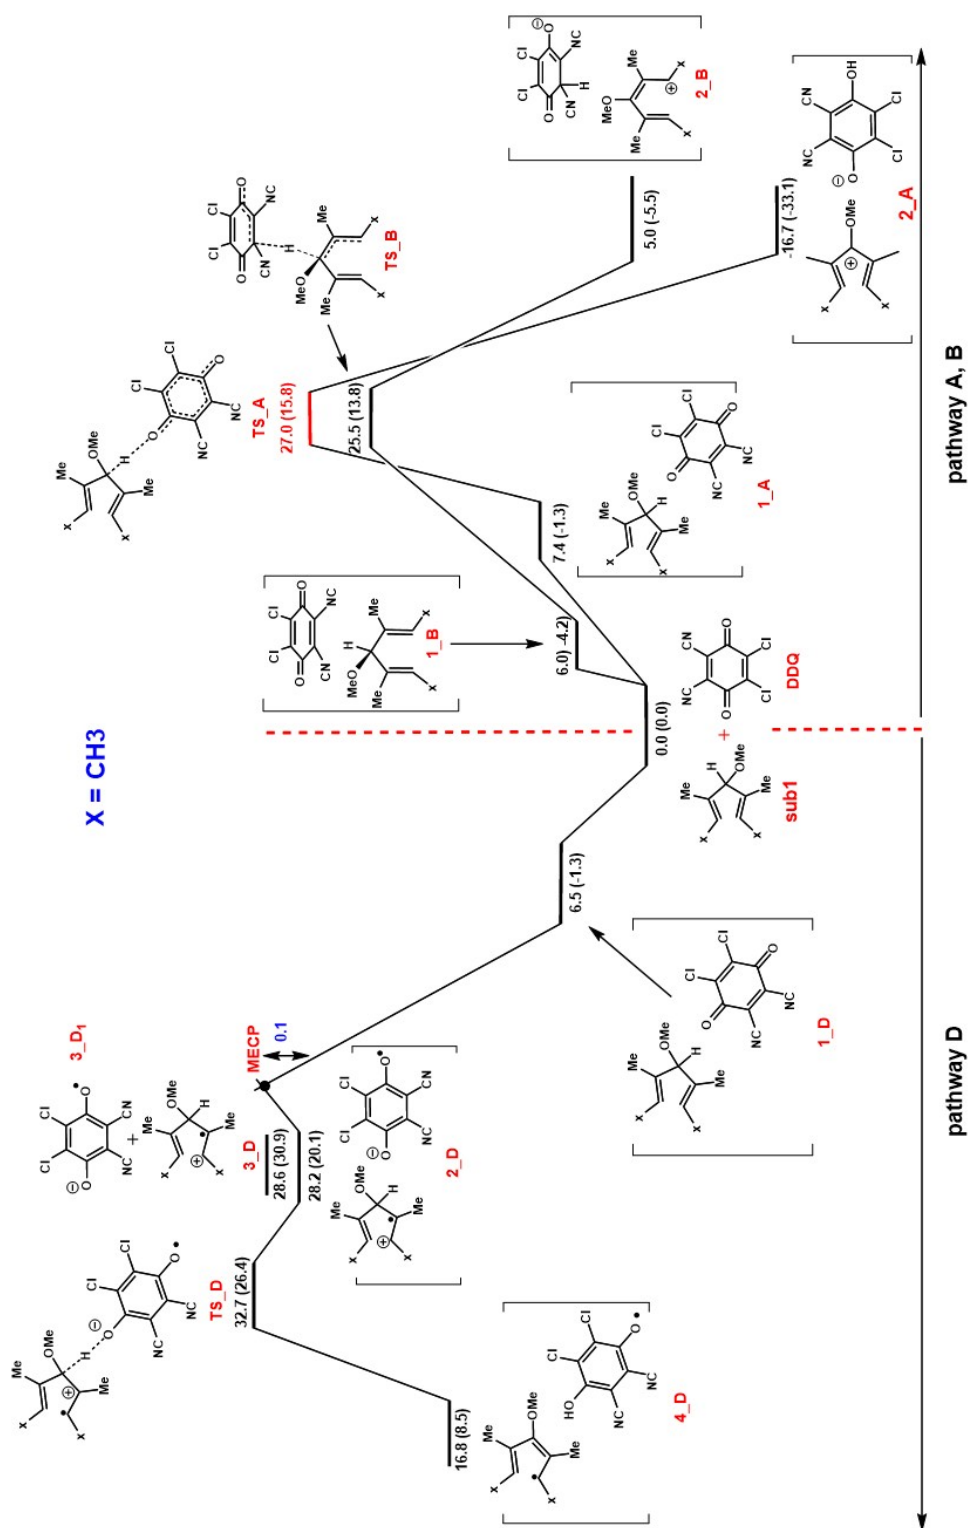

**Cartesian coordinates and total energies for all of the calculated structures  
in CH<sub>2</sub>Cl<sub>2</sub>**

**Fig. 1**  
**sub\_1**

E(B3LYP/BS1) = -850.566216 au

H(B3LYP/BS1) = -850.178419 au

G(B3LYP/BS1) = -850.250818 au

E(M06-2X/BS2//B3LYP/BS1) = -850.436541 au

|   |             |             |             |
|---|-------------|-------------|-------------|
| C | 0.00031100  | 1.91110300  | -0.19352400 |
| C | 1.43547800  | 1.37216800  | -0.12392500 |
| C | -1.07740400 | 0.95889700  | 0.31702400  |
| C | 1.65346100  | 0.04373000  | -0.06456900 |
| H | 0.78068100  | -0.59763200 | 0.04495100  |
| C | -1.94163600 | 0.42985300  | -0.57330200 |
| H | -1.83641800 | 0.75965600  | -1.60801500 |
| C | 2.93016700  | -0.69846300 | -0.10393300 |
| C | 4.01679100  | -0.34402500 | -0.92551700 |
| C | 3.05361900  | -1.86184000 | 0.68092700  |
| C | 5.18938900  | -1.10138700 | -0.93220100 |
| H | 3.93392200  | 0.51237700  | -1.58665400 |

|   |             |             |             |
|---|-------------|-------------|-------------|
| C | 4.22581000  | -2.61578100 | 0.67950900  |
| H | 2.21734300  | -2.16832400 | 1.30517400  |
| C | 5.30363400  | -2.23525700 | -0.12497900 |
| H | 6.01218000  | -0.80858800 | -1.57927800 |
| H | 4.29687300  | -3.50328900 | 1.30292500  |
| H | 6.21718100  | -2.82351000 | -0.13193000 |
| C | -3.05308000 | -0.51583100 | -0.36838100 |
| C | -3.08247800 | -1.49032800 | 0.64819500  |
| C | -4.13858800 | -0.47171300 | -1.26645300 |
| C | -4.16683200 | -2.35914800 | 0.77707100  |
| H | -2.24107500 | -1.59205200 | 1.32423100  |
| C | -5.22392200 | -1.33537900 | -1.13489500 |
| H | -4.12663200 | 0.25863400  | -2.07226400 |
| C | -5.24536600 | -2.28227300 | -0.10696000 |
| H | -4.16298500 | -3.10571500 | 1.56695900  |
| H | -6.05111400 | -1.27304800 | -1.83705900 |
| H | -6.08796100 | -2.96047500 | -0.00381300 |
| C | 2.51497800  | 2.42238500  | -0.20381400 |
| H | 3.49957800  | 2.01370200  | 0.03038000  |
| H | 2.56279100  | 2.86814500  | -1.20803800 |
| H | 2.29570200  | 3.23890200  | 0.48882000  |
| C | -1.10260600 | 0.74295900  | 1.81127000  |
| H | -0.74736800 | 1.64736900  | 2.31434100  |
| H | -2.10859000 | 0.51391700  | 2.17337000  |
| H | -0.44133800 | -0.07666900 | 2.12099400  |
| O | -0.03497600 | 3.15105400  | 0.52499100  |
| H | -0.20649400 | 2.13257900  | -1.25619800 |
| C | -1.15658900 | 3.96140300  | 0.21012500  |
| H | -1.04058300 | 4.89153800  | 0.77219200  |
| H | -1.19191400 | 4.19225700  | -0.86543400 |
| H | -2.10479000 | 3.48534700  | 0.49441200  |

## DDQ

E(B3LYP/BS1) = -1485.107254 au

H(B3LYP/BS1) = -1485.031251 au

G(B3LYP/BS1) = -1485.084679 au

E(M06-2X/BS2//B3LYP/BS1) = -1485.08086 au

|    |             |             |             |
|----|-------------|-------------|-------------|
| O  | -0.14245300 | 2.67207600  | -0.00005800 |
| C  | -0.11925600 | 1.45737100  | -0.00002900 |
| C  | -1.40399400 | 0.67819700  | -0.00003900 |
| C  | 1.15361100  | 0.67729700  | -0.00002400 |
| C  | -1.40402000 | -0.67817700 | -0.00009800 |
| C  | 1.15359200  | -0.67731900 | -0.00003200 |
| C  | -0.11930400 | -1.45734900 | -0.00009000 |
| O  | -0.14253600 | -2.67205100 | -0.00012100 |
| Cl | 2.59322100  | 1.61598400  | 0.00003800  |
| Cl | 2.59316200  | -1.61604000 | 0.00006000  |
| C  | -2.60629000 | 1.44836800  | 0.00005000  |
| C  | -2.60632400 | -1.44832400 | 0.00004800  |
| N  | -3.58402900 | 2.07636200  | 0.00002200  |
| N  | -3.58406800 | -2.07631000 | 0.00013000  |

1\_A

E(B3LYP/BS1) = -2335.675559 au  
H(B3LYP/BS1) = -2335.209679 au  
G(B3LYP/BS1) = -2335.321691 au  
E(M06-2X/BS2//B3LYP/BS1) = -2335.520358 au

|   |             |             |             |
|---|-------------|-------------|-------------|
| C | 1.88532000  | -0.13574300 | 1.58345200  |
| C | 2.01545100  | 1.36522800  | 1.29428800  |
| C | 2.95791400  | -1.01659500 | 0.94985600  |
| C | 2.67829100  | 1.78202600  | 0.19762300  |
| H | 3.20523500  | 1.02509900  | -0.38138100 |
| C | 2.59311900  | -1.87288500 | -0.02643900 |
| H | 1.53066100  | -1.90679800 | -0.27239500 |
| C | 2.81723400  | 3.14878600  | -0.34655700 |
| C | 1.76823400  | 4.08740400  | -0.37169100 |
| C | 4.04482700  | 3.52005600  | -0.92929500 |
| C | 1.95379400  | 5.35546300  | -0.92524900 |
| H | 0.79104200  | 3.81505700  | 0.01448800  |
| C | 4.23257000  | 4.78785000  | -1.47727300 |
| H | 4.86154600  | 2.80178800  | -0.94196400 |
| C | 3.18693300  | 5.71536500  | -1.47327100 |
| H | 1.12651300  | 6.06044700  | -0.93688200 |
| H | 5.19363200  | 5.05077000  | -1.91164700 |
| H | 3.32837400  | 6.70292300  | -1.90394000 |
| C | 3.40852100  | -2.82148000 | -0.80596800 |
| C | 4.76510100  | -2.61742700 | -1.12486100 |
| C | 2.78786700  | -3.98827900 | -1.29576100 |
| C | 5.47510300  | -3.55798700 | -1.87228100 |
| H | 5.26232200  | -1.70549800 | -0.81365700 |
| C | 3.49769300  | -4.93036000 | -2.03732000 |
| H | 1.73506600  | -4.15566600 | -1.07998400 |
| C | 4.84936700  | -4.72145300 | -2.32551200 |
| H | 6.51997400  | -3.37473500 | -2.10885100 |
| H | 2.99544300  | -5.82560700 | -2.39433300 |
| H | 5.40519100  | -5.45179800 | -2.90707400 |
| C | 1.28903800  | 2.26590200  | 2.26091200  |
| H | 1.52869300  | 3.31793600  | 2.09670700  |
| H | 0.20082900  | 2.14449100  | 2.16973200  |
| H | 1.54811000  | 1.99910400  | 3.28897600  |
| C | 4.34178500  | -0.88450000 | 1.53856000  |
| H | 4.26060900  | -0.63802700 | 2.60163200  |
| H | 4.91847900  | -1.80769400 | 1.43651300  |
| H | 4.91550100  | -0.07730300 | 1.06518100  |
| O | 1.86551300  | -0.31047200 | 3.00641900  |
| H | 0.90029900  | -0.44711000 | 1.19363400  |
| C | 1.30957900  | -1.54977300 | 3.41834800  |
| H | 1.30438200  | -1.54473000 | 4.51137200  |
| H | 0.27802600  | -1.66250200 | 3.05265400  |
| H | 1.90030700  | -2.40634200 | 3.06587700  |
| O | -1.82561900 | 0.03706600  | 1.42743900  |
| C | -2.81741100 | -0.03257800 | 0.72771300  |
| C | -3.38336100 | 1.20712600  | 0.09521900  |
| C | -3.52267900 | -1.32013000 | 0.46000100  |

|    |             |             |             |
|----|-------------|-------------|-------------|
| C  | -4.49750300 | 1.15698500  | -0.67706400 |
| C  | -4.63320000 | -1.37111200 | -0.31458100 |
| C  | -5.20900300 | -0.14101000 | -0.93464200 |
| O  | -6.20923800 | -0.16229300 | -1.62365300 |
| Cl | -2.82989300 | -2.70898800 | 1.19818600  |
| Cl | -5.47727500 | -2.82948400 | -0.65056900 |
| C  | -2.68209500 | 2.42353000  | 0.35361500  |
| C  | -5.06325700 | 2.31666100  | -1.28817400 |
| N  | -2.10768400 | 3.41173300  | 0.56360900  |
| N  | -5.52503300 | 3.25960600  | -1.78613400 |

### TS\_A

E(B3LYP/BS1) = -2335.651003 au

H(B3LYP/BS1) = -2335.191202 au

G(B3LYP/BS1) = -2335.292982 au

E(M06-2X/BS2//B3LYP/BS1) = -2335.502807 au

|   |             |             |             |
|---|-------------|-------------|-------------|
| C | 1.27543000  | -2.04497800 | -0.41603400 |
| C | 2.55201700  | -1.41259100 | 0.06244000  |
| C | 0.36538200  | -1.36746000 | -1.34819000 |
| C | 3.16929600  | -0.47429900 | -0.70135100 |
| H | 2.73163800  | -0.26506700 | -1.67515400 |
| C | 0.08979000  | -0.02856800 | -1.10903800 |
| H | 0.71945700  | 0.45072900  | -0.36759400 |
| C | 4.40031500  | 0.27199000  | -0.42519500 |
| C | 4.79641000  | 0.67052900  | 0.86795400  |
| C | 5.20348300  | 0.66200000  | -1.51747600 |
| C | 5.96691400  | 1.40335800  | 1.05812100  |
| H | 4.16532000  | 0.44502800  | 1.72037300  |
| C | 6.37839100  | 1.38288000  | -1.32381300 |
| H | 4.89963100  | 0.38420800  | -2.52372400 |
| C | 6.76714000  | 1.75337600  | -0.03261200 |
| H | 6.24973700  | 1.71033700  | 2.06118000  |
| H | 6.98747500  | 1.66313400  | -2.17865500 |
| H | 7.67978600  | 2.32246400  | 0.12041000  |
| C | -0.84474400 | 0.88156900  | -1.74011400 |
| C | -1.98757800 | 0.49300500  | -2.48154200 |
| C | -0.63507100 | 2.26797500  | -1.52705600 |
| C | -2.85577200 | 1.44842800  | -2.99804700 |
| H | -2.21808200 | -0.55419400 | -2.62484400 |
| C | -1.49990300 | 3.21885300  | -2.05605600 |
| H | 0.23060300  | 2.58833000  | -0.95404200 |
| C | -2.61610100 | 2.81181000  | -2.79247100 |
| H | -3.73198500 | 1.12921300  | -3.55418700 |
| H | -1.31160900 | 4.27446700  | -1.88601200 |
| H | -3.30050000 | 3.55106200  | -3.19795900 |
| C | 3.09765000  | -1.97571800 | 1.35270900  |
| H | 4.18219700  | -1.86237300 | 1.41500400  |
| H | 2.65367800  | -1.47913500 | 2.22431400  |
| H | 2.85826300  | -3.04064600 | 1.42365200  |
| C | -0.25733100 | -2.17317700 | -2.45769100 |
| H | 0.39588000  | -3.00932600 | -2.71797800 |
| H | -1.23663400 | -2.58755100 | -2.18731300 |

|    |             |             |             |
|----|-------------|-------------|-------------|
| H  | -0.39964000 | -1.54913300 | -3.34380700 |
| O  | 1.47342200  | -3.41415300 | -0.58185400 |
| H  | 0.49964300  | -1.91231800 | 0.67146000  |
| C  | 0.44101300  | -4.33631800 | -0.20023300 |
| H  | 0.85399600  | -5.32809400 | -0.39092600 |
| H  | 0.20796700  | -4.23080600 | 0.86319600  |
| H  | -0.47134700 | -4.20517700 | -0.78751400 |
| O  | -0.26642900 | -1.72268100 | 1.67925100  |
| C  | -1.13686400 | -0.79386200 | 1.46189400  |
| C  | -0.85718200 | 0.57077200  | 1.84244900  |
| C  | -2.45693300 | -1.07540900 | 0.92490900  |
| C  | -1.77219900 | 1.58800400  | 1.63472200  |
| C  | -3.37465800 | -0.08222700 | 0.71239600  |
| C  | -3.08761700 | 1.33331300  | 1.01786200  |
| O  | -3.89156900 | 2.24128300  | 0.80435300  |
| Cl | -2.82663300 | -2.73860700 | 0.59064200  |
| Cl | -4.96144200 | -0.40498000 | 0.09707000  |
| C  | 0.40641600  | 0.83374600  | 2.46126000  |
| C  | -1.49975700 | 2.93053600  | 2.02726100  |
| N  | 1.43044600  | 1.05323700  | 2.96701000  |
| N  | -1.27890500 | 4.02747800  | 2.34765600  |

## 2\_A

E(B3LYP/BS1) = -2335.694636 au

H(B3LYP/BS1) = -2335.228269 au

G(B3LYP/BS1) = -2335.329554 au

E(M06-2X/BS2//B3LYP/BS1) = -2335.568667 au

|   |             |             |             |
|---|-------------|-------------|-------------|
| C | -0.84977900 | 0.28126700  | 1.83825200  |
| C | -2.18893600 | -0.23959900 | 1.28886300  |
| C | -0.27480100 | 1.53015100  | 1.16519900  |
| C | -2.83217300 | 0.41191000  | 0.29769000  |
| H | -2.37727200 | 1.31967100  | -0.08527500 |
| C | 0.10990300  | 1.46413300  | -0.12872600 |
| H | -0.04685300 | 0.52253100  | -0.64990900 |
| C | -4.12758900 | 0.10098800  | -0.33227100 |
| C | -4.64491500 | -1.19932400 | -0.48945800 |
| C | -4.87691100 | 1.17439100  | -0.85571700 |
| C | -5.87329800 | -1.40987900 | -1.11715200 |
| H | -4.07293300 | -2.05474500 | -0.14937400 |
| C | -6.10828800 | 0.96541200  | -1.47238800 |
| H | -4.48493300 | 2.18478100  | -0.76587900 |
| C | -6.61474000 | -0.33082000 | -1.60302200 |
| H | -6.24783800 | -2.42350700 | -1.23259000 |
| H | -6.66970700 | 1.81256400  | -1.85713200 |
| H | -7.57190100 | -0.49858800 | -2.08900600 |
| C | 0.67114800  | 2.51493400  | -0.99449700 |
| C | 1.48893200  | 3.56280200  | -0.52989500 |
| C | 0.41103100  | 2.44127600  | -2.37776600 |
| C | 1.99789800  | 4.51525700  | -1.41320300 |
| H | 1.75966900  | 3.61478700  | 0.51851200  |
| C | 0.91019600  | 3.39920600  | -3.25716500 |
| H | -0.19841000 | 1.62544200  | -2.75916400 |



|    |             |             |             |
|----|-------------|-------------|-------------|
| C  | 1.70427700  | 4.44444700  | -2.77677300 |
| H  | 2.63362600  | 5.31056100  | -1.03372100 |
| H  | 0.68591000  | 3.32671900  | -4.31786400 |
| H  | 2.10092600  | 5.18924700  | -3.46107000 |
| C  | -2.76221900 | -1.42523000 | 2.03439800  |
| H  | -3.85462600 | -1.37636400 | 2.05794300  |
| H  | -2.48154700 | -2.37742100 | 1.57415200  |
| H  | -2.39564100 | -1.43777300 | 3.06175300  |
| C  | -0.31348700 | 2.81107900  | 1.96677100  |
| H  | -1.14661800 | 2.79023700  | 2.67356300  |
| H  | 0.60283200  | 2.97316800  | 2.54721600  |
| H  | -0.43739400 | 3.67247100  | 1.30526800  |
| O  | -1.08442200 | 0.43630300  | 3.19970000  |
| H  | 4.09699400  | -2.81357500 | -2.29101900 |
| C  | -0.01002200 | 0.47905300  | 4.14641200  |
| H  | 0.58050000  | -0.43869800 | 4.10329200  |
| H  | 0.64384900  | 1.34056800  | 4.00036300  |
| H  | -0.49943100 | 0.55529500  | 5.11932000  |
| O  | 4.32531900  | -2.10052000 | -1.66670600 |
| C  | 3.28159600  | -1.83090100 | -0.86555800 |
| C  | 3.44096000  | -0.82665100 | 0.09920600  |
| C  | 2.04770900  | -2.50287100 | -0.93380100 |
| C  | 2.37731600  | -0.49358400 | 0.97518000  |
| C  | 0.99510400  | -2.16743400 | -0.07744400 |
| C  | 1.12735600  | -1.14288000 | 0.89525100  |
| O  | 0.12996100  | -0.91883500 | 1.77103300  |
| Cl | 1.88986100  | -3.76540400 | -2.12490800 |
| Cl | -0.49920100 | -3.03530700 | -0.19051700 |
| C  | 4.69681400  | -0.15257500 | 0.18493500  |
| C  | 2.62449500  | 0.51540600  | 1.95561200  |
| N  | 5.71998000  | 0.39629200  | 0.25453000  |
| N  | 2.89820000  | 1.33504400  | 2.73447300  |

### **1\_B**

E(B3LYP/BS1) = -2335.674351 au

H(B3LYP/BS1) = -2335.208896 au

G(B3LYP/BS1) = -2335.318809 au

E(M06-2X/BS2//B3LYP/BS1) = -2335.524777 au

|   |             |             |             |
|---|-------------|-------------|-------------|
| C | -0.72095500 | -0.91007600 | 1.95604300  |
| C | 0.50605200  | -1.69864200 | 1.46282700  |
| C | -2.01835400 | -1.30766500 | 1.25673200  |
| C | 0.72417500  | -1.74756400 | 0.12530800  |
| H | -0.04368000 | -1.29541500 | -0.50269500 |
| C | -2.65295400 | -0.39515800 | 0.49321500  |
| H | -2.16316800 | 0.57288100  | 0.37895700  |
| C | 1.79505600  | -2.40235100 | -0.63841200 |
| C | 3.11614900  | -2.58095100 | -0.17592700 |
| C | 1.48884100  | -2.85679100 | -1.93971000 |
| C | 4.06971200  | -3.22495300 | -0.96472700 |
| H | 3.41117800  | -2.18637300 | 0.78906400  |
| C | 2.43964800  | -3.50385900 | -2.72334900 |
| H | 0.48319800  | -2.70919500 | -2.32597300 |

|    |             |             |             |
|----|-------------|-------------|-------------|
| C  | 3.73632100  | -3.69747100 | -2.23543000 |
| H  | 5.08105800  | -3.34700100 | -0.58658300 |
| H  | 2.17206900  | -3.85509400 | -3.71621700 |
| H  | 4.48161800  | -4.19940100 | -2.84608900 |
| C  | -3.90980600 | -0.51422000 | -0.27016200 |
| C  | -5.01306600 | -1.27941200 | 0.15335200  |
| C  | -4.03553800 | 0.21401500  | -1.46979300 |
| C  | -6.17901100 | -1.33951400 | -0.61151300 |
| H  | -4.97407800 | -1.80454600 | 1.10151100  |
| C  | -5.19708300 | 0.14942900  | -2.23671000 |
| H  | -3.20376100 | 0.83038400  | -1.80325300 |
| C  | -6.27462100 | -0.63343000 | -1.81253300 |
| H  | -7.01914200 | -1.93298400 | -0.26058900 |
| H  | -5.26380400 | 0.71387600  | -3.16301200 |
| H  | -7.18364100 | -0.68187300 | -2.40569600 |
| C  | 1.35786600  | -2.37267900 | 2.50438500  |
| H  | 1.95610400  | -3.17714700 | 2.07199800  |
| H  | 2.04436500  | -1.66215500 | 2.98655000  |
| H  | 0.72999000  | -2.78161900 | 3.29902400  |
| C  | -2.47290700 | -2.72373500 | 1.50914600  |
| H  | -1.61092700 | -3.39889800 | 1.54742400  |
| H  | -2.98880900 | -2.81351300 | 2.47376300  |
| H  | -3.15243900 | -3.08104300 | 0.73175000  |
| O  | -0.83056300 | -1.09206700 | 3.36669100  |
| H  | -0.53996300 | 0.16091200  | 1.75858100  |
| C  | -1.67366500 | -0.14350200 | 4.00431600  |
| H  | -2.70844500 | -0.20036500 | 3.64180000  |
| H  | -1.65312200 | -0.37620800 | 5.07166200  |
| H  | -1.30482000 | 0.88166300  | 3.85219700  |
| O  | -0.45928900 | 3.91416500  | 0.58484400  |
| C  | 0.39017700  | 3.11193400  | 0.24289100  |
| C  | 1.31203300  | 2.50543600  | 1.25561400  |
| C  | 0.56337300  | 2.68236000  | -1.17458100 |
| C  | 2.27633400  | 1.61618900  | 0.89141500  |
| C  | 1.53116200  | 1.80607000  | -1.53872400 |
| C  | 2.48686700  | 1.23956800  | -0.54270600 |
| O  | 3.41499300  | 0.51938600  | -0.86196400 |
| Cl | -0.54028300 | 3.37964800  | -2.29664000 |
| Cl | 1.76963500  | 1.29401000  | -3.16341800 |
| C  | 1.12059400  | 2.91905700  | 2.60860500  |
| C  | 3.16826000  | 1.02568100  | 1.83615300  |
| N  | 0.96191200  | 3.25616000  | 3.70978500  |
| N  | 3.88696600  | 0.53419200  | 2.60677100  |

### **TS\_B**

E(B3LYP/BS1) = -2335.639038 au

H(B3LYP/BS1) = -2335.178289 au

G(B3LYP/BS1) = -2335.280737 au

E(M06-2X/BS2//B3LYP/BS1) = -2335.49227 au

|   |             |             |            |
|---|-------------|-------------|------------|
| C | 0.09830200  | -1.32048200 | 1.69634500 |
| C | 1.42872700  | -1.58915500 | 1.13760100 |
| C | -1.12560000 | -1.81877300 | 0.94700800 |

|    |             |             |             |
|----|-------------|-------------|-------------|
| C  | 1.56437900  | -1.40702300 | -0.22151100 |
| H  | 0.63989800  | -1.20111300 | -0.75630200 |
| C  | -1.93579900 | -1.01686100 | 0.23316800  |
| H  | -1.66256300 | 0.03040000  | 0.14878600  |
| C  | 2.71532200  | -1.52064900 | -1.10075500 |
| C  | 4.06842900  | -1.55079100 | -0.68856400 |
| C  | 2.44355800  | -1.58247600 | -2.48918000 |
| C  | 5.08990700  | -1.66731800 | -1.62668500 |
| H  | 4.32861900  | -1.44774500 | 0.35510700  |
| C  | 3.46679700  | -1.71019500 | -3.42056300 |
| H  | 1.41130300  | -1.54008200 | -2.82614900 |
| C  | 4.79650400  | -1.75688000 | -2.99071700 |
| H  | 6.12278300  | -1.68213200 | -1.29153100 |
| H  | 3.23141500  | -1.76616400 | -4.47916700 |
| H  | 5.60031900  | -1.85174900 | -3.71508500 |
| C  | -3.15407900 | -1.37435100 | -0.51988500 |
| C  | -4.10720600 | -2.29494200 | -0.04790100 |
| C  | -3.40183500 | -0.72735800 | -1.74543900 |
| C  | -5.25222900 | -2.57995400 | -0.79280100 |
| H  | -3.97116400 | -2.76563700 | 0.92016900  |
| C  | -4.54092500 | -1.01947600 | -2.49290300 |
| H  | -2.68665000 | 0.00187500  | -2.11721800 |
| C  | -5.46986600 | -1.95066900 | -2.02022800 |
| H  | -5.97941800 | -3.28909500 | -0.40711100 |
| H  | -4.70654400 | -0.51619800 | -3.44141200 |
| H  | -6.36188800 | -2.17451300 | -2.59849700 |
| C  | 2.54142500  | -1.97179400 | 2.08040300  |
| H  | 3.18488300  | -2.72409100 | 1.61578400  |
| H  | 3.17194300  | -1.11436500 | 2.34543800  |
| H  | 2.13589700  | -2.38357400 | 3.00493500  |
| C  | -1.28316700 | -3.32326800 | 1.07715800  |
| H  | -0.30902800 | -3.81478800 | 0.98506500  |
| H  | -1.69977500 | -3.61665600 | 2.04839800  |
| H  | -1.94110600 | -3.71305500 | 0.29784500  |
| O  | 0.05662100  | -1.48306800 | 3.05073300  |
| H  | 0.13241400  | 0.12559000  | 1.55762500  |
| C  | -1.16935100 | -1.18309800 | 3.74430800  |
| H  | -1.97115500 | -1.86331800 | 3.44825700  |
| H  | -0.93769700 | -1.31589600 | 4.80060600  |
| H  | -1.47245300 | -0.14904000 | 3.55818800  |
| O  | -1.61970200 | 2.30619400  | 2.22267300  |
| C  | -0.80162700 | 2.14587700  | 1.33741000  |
| C  | 0.52301500  | 1.44191500  | 1.61479500  |
| C  | -1.04830200 | 2.56497000  | -0.06750000 |
| C  | 1.58858400  | 1.62100600  | 0.66690600  |
| C  | -0.07955400 | 2.48286600  | -1.01092400 |
| C  | 1.33478400  | 2.05089700  | -0.69424000 |
| O  | 2.20628400  | 2.12249400  | -1.55755800 |
| Cl | -2.63663400 | 3.17540000  | -0.38882200 |
| Cl | -0.35554800 | 2.94075600  | -2.64843000 |
| C  | 0.89004500  | 1.51231900  | 3.01932500  |

|   |            |            |            |
|---|------------|------------|------------|
| C | 2.94036900 | 1.43030900 | 1.03870600 |
| N | 1.19377900 | 1.55957700 | 4.13889800 |
| N | 4.05447800 | 1.28669000 | 1.35720600 |

## 2\_B

E(B3LYP/BS1) = -2335.682057 au

H(B3LYP/BS1) = -2335.21514 au

G(B3LYP/BS1) = -2335.326858 au

E(M06-2X/BS2//B3LYP/BS1) = -2335.524065 au

|   |             |             |             |
|---|-------------|-------------|-------------|
| C | -3.25323400 | -0.01397900 | 1.86169700  |
| C | -3.03760100 | -1.28296300 | 1.22601200  |
| C | -3.36198300 | 1.25803200  | 1.15427100  |
| C | -3.24875700 | -1.34930100 | -0.13841500 |
| H | -3.70487000 | -0.48004000 | -0.60147700 |
| C | -2.37380100 | 1.55460100  | 0.25242500  |
| H | -1.54945300 | 0.84722400  | 0.19377100  |
| C | -3.01854400 | -2.44585300 | -1.05543800 |
| C | -2.06930700 | -3.47346200 | -0.84478900 |
| C | -3.76667900 | -2.45068400 | -2.25688500 |
| C | -1.90815800 | -4.47942100 | -1.79213800 |
| H | -1.41888800 | -3.45142800 | 0.02204100  |
| C | -3.61698500 | -3.47215500 | -3.18652400 |
| H | -4.47794000 | -1.65001500 | -2.44113800 |
| C | -2.68766700 | -4.49171900 | -2.95373900 |
| H | -1.16462100 | -5.25381600 | -1.62929000 |
| H | -4.21108300 | -3.47070000 | -4.09526900 |
| H | -2.55912600 | -5.28509900 | -3.68443200 |
| C | -2.17757700 | 2.73212800  | -0.58604000 |
| C | -3.16666800 | 3.69336400  | -0.89475500 |
| C | -0.88961800 | 2.89136400  | -1.14925000 |
| C | -2.87030600 | 4.77119700  | -1.72427200 |
| H | -4.17390400 | 3.59458700  | -0.51439700 |
| C | -0.59879600 | 3.97751200  | -1.96913700 |
| H | -0.12054300 | 2.15867000  | -0.91710800 |
| C | -1.58727000 | 4.92172100  | -2.25937300 |
| H | -3.64545300 | 5.49538200  | -1.95760300 |
| H | 0.39842900  | 4.08570800  | -2.38594700 |
| H | -1.36276100 | 5.76741100  | -2.90333000 |
| C | -2.69388300 | -2.47402000 | 2.09089600  |
| H | -3.05670900 | -3.39856400 | 1.63659600  |
| H | -1.60991200 | -2.56586100 | 2.22418800  |
| H | -3.14906800 | -2.37176400 | 3.07749400  |
| C | -4.55019700 | 2.13812600  | 1.49122000  |
| H | -5.11688500 | 1.74794000  | 2.33807300  |
| H | -4.25464200 | 3.16780500  | 1.71629300  |
| H | -5.24440600 | 2.16220300  | 0.64334300  |
| O | -3.36997600 | -0.07296500 | 3.17385400  |
| H | 4.16847800  | -1.87308000 | 1.91178800  |
| C | -3.19961100 | 1.08072400  | 4.03261100  |
| H | -4.17849200 | 1.46244500  | 4.32510400  |
| H | -2.66934700 | 0.70625100  | 4.90800100  |
| H | -2.61551600 | 1.85146500  | 3.52788400  |

|    |            |             |             |
|----|------------|-------------|-------------|
| O  | 6.21385300 | -1.11313800 | 0.34402300  |
| C  | 5.05669800 | -0.73514100 | 0.39638600  |
| C  | 3.94438600 | -1.70930300 | 0.84325900  |
| C  | 4.64843400 | 0.64556900  | 0.09008400  |
| C  | 2.51414800 | -1.23117600 | 0.67810500  |
| C  | 3.34118300 | 1.00817200  | 0.03109700  |
| C  | 2.16973400 | 0.07769300  | 0.29584600  |
| O  | 1.00744500 | 0.52644900  | 0.17549300  |
| Cl | 5.95839300 | 1.74583900  | -0.24817000 |
| Cl | 2.89895900 | 2.63263100  | -0.37129600 |
| C  | 4.17088000 | -3.00115400 | 0.17218800  |
| C  | 1.48625800 | -2.12655800 | 1.01617100  |
| N  | 4.31511100 | -4.02466000 | -0.35581500 |
| N  | 0.65641700 | -2.90153800 | 1.30728500  |

### **1\_D**

E(B3LYP/BS1) = -2335.675341 au

H(B3LYP/BS1) = -2335.209622 au

G(B3LYP/BS1) = -2335.324388 au

E(M06-2X/BS2//B3LYP/BS1) = -2335.52029 au

|   |             |             |             |
|---|-------------|-------------|-------------|
| C | 2.94211500  | 0.13742200  | 1.81915900  |
| C | 3.40574900  | 1.30381100  | 0.93846800  |
| C | 3.04195800  | -1.24750600 | 1.19296400  |
| C | 3.53940800  | 1.13806200  | -0.39213700 |
| H | 3.41046700  | 0.12908200  | -0.78036200 |
| C | 1.90520700  | -1.88272800 | 0.84068000  |
| H | 0.97662900  | -1.32683100 | 0.97797600  |
| C | 3.86533000  | 2.13495500  | -1.43163400 |
| C | 3.38995900  | 3.45996800  | -1.42248900 |
| C | 4.65078600  | 1.72764300  | -2.52817200 |
| C | 3.71781100  | 4.34784000  | -2.44849300 |
| H | 2.73406300  | 3.79067200  | -0.62400600 |
| C | 4.98334100  | 2.61465800  | -3.55038000 |
| H | 5.00922400  | 0.70158400  | -2.56805800 |
| C | 4.52157600  | 3.93344200  | -3.51272000 |
| H | 3.33406500  | 5.36438900  | -2.41976400 |
| H | 5.59927400  | 2.27566100  | -4.37925500 |
| H | 4.77525300  | 4.62623200  | -4.31042700 |
| C | 1.70582600  | -3.21018900 | 0.23222500  |
| C | 2.57096200  | -4.30686900 | 0.41565700  |
| C | 0.55174300  | -3.40932900 | -0.55293200 |
| C | 2.30741900  | -5.53628800 | -0.19029600 |
| H | 3.43753300  | -4.21293100 | 1.05995900  |
| C | 0.29185900  | -4.63495500 | -1.16220500 |
| H | -0.14503200 | -2.58557700 | -0.68384400 |
| C | 1.17366800  | -5.70546200 | -0.98825000 |
| H | 2.98816100  | -6.36816700 | -0.02888900 |
| H | -0.60332600 | -4.75289500 | -1.76704500 |
| H | 0.97258300  | -6.66425800 | -1.45842300 |
| C | 3.61572700  | 2.60380300  | 1.67485400  |
| H | 4.15406400  | 3.33537400  | 1.06910900  |
| H | 2.65640200  | 3.05203400  | 1.97223800  |

|    |             |             |             |
|----|-------------|-------------|-------------|
| H  | 4.17648100  | 2.42419000  | 2.59553700  |
| C  | 4.44466800  | -1.78776800 | 1.04428100  |
| H  | 5.15556400  | -0.96812600 | 0.90514500  |
| H  | 4.76359700  | -2.33512700 | 1.94113700  |
| H  | 4.53101800  | -2.46995100 | 0.19377700  |
| O  | 3.70384500  | 0.18217500  | 3.03533700  |
| H  | 1.88476800  | 0.33343000  | 2.07303100  |
| C  | 3.10509600  | -0.52707600 | 4.10832700  |
| H  | 3.75547400  | -0.39327800 | 4.97658400  |
| H  | 2.10600500  | -0.12903600 | 4.34252500  |
| H  | 3.00880600  | -1.60038200 | 3.89416200  |
| O  | -1.59678300 | -0.47052900 | 0.10091800  |
| C  | -2.73428600 | -0.04571600 | 0.04370200  |
| C  | -3.75634500 | -0.73546000 | -0.81475800 |
| C  | -3.17901600 | 1.15774500  | 0.80566400  |
| C  | -5.03245700 | -0.28156900 | -0.88952000 |
| C  | -4.45345100 | 1.61134200  | 0.73063900  |
| C  | -5.47531100 | 0.92898900  | -0.11746100 |
| O  | -6.62361600 | 1.31692900  | -0.19767900 |
| Cl | -1.97034200 | 1.90947200  | 1.76890100  |
| Cl | -5.01082300 | 2.99143900  | 1.58896600  |
| C  | -3.30683700 | -1.88353900 | -1.53468200 |
| C  | -6.02835200 | -0.91387800 | -1.69364200 |
| N  | -2.93930500 | -2.81780700 | -2.12001000 |
| N  | -6.83980300 | -1.42765600 | -2.34778200 |

## 2\_D

E(B3LYP/BS1) = -2335.656198 au

H(B3LYP/BS1) = -2335.191604 au

G(B3LYP/BS1) = -2335.304158 au

E(M06-2X/BS2//B3LYP/BS1) = -2335.488257 au

|   |            |             |             |
|---|------------|-------------|-------------|
| C | 2.20945900 | -0.66349900 | 2.04252400  |
| C | 2.42163700 | 0.73698500  | 1.48051800  |
| C | 2.56454900 | -1.73394800 | 1.02150300  |
| C | 3.38379200 | 0.93901400  | 0.52761000  |
| H | 4.03066600 | 0.09447900  | 0.29969000  |
| C | 1.60550400 | -1.95557400 | 0.04625800  |
| H | 0.70869800 | -1.34266100 | 0.13580000  |
| C | 3.72779500 | 2.15180900  | -0.19344500 |
| C | 2.80387900 | 3.18270400  | -0.48993700 |
| C | 5.05479500 | 2.28114400  | -0.67239000 |
| C | 3.20784900 | 4.30530300  | -1.20336100 |
| H | 1.76248000 | 3.08558000  | -0.20620600 |
| C | 5.45616800 | 3.41222900  | -1.37074400 |
| H | 5.76756400 | 1.48561100  | -0.47240300 |
| C | 4.53364200 | 4.43181800  | -1.63562200 |
| H | 2.48429600 | 5.08140500  | -1.43399700 |
| H | 6.48163900 | 3.50095200  | -1.71656600 |
| H | 4.84254800 | 5.31381200  | -2.18905500 |
| C | 1.58695800 | -2.83789300 | -1.08923600 |
| C | 2.53215400 | -3.86299100 | -1.36608300 |
| C | 0.50685400 | -2.66035700 | -2.00039800 |

|    |             |             |             |
|----|-------------|-------------|-------------|
| C  | 2.40415100  | -4.64798100 | -2.50168800 |
| H  | 3.34743500  | -4.05992500 | -0.68415700 |
| C  | 0.39214100  | -3.44255300 | -3.13852200 |
| H  | -0.22588300 | -1.88709300 | -1.79008800 |
| C  | 1.34239700  | -4.43958900 | -3.39467100 |
| H  | 3.12904700  | -5.43191600 | -2.69743200 |
| H  | -0.43324000 | -3.28573600 | -3.82570800 |
| H  | 1.25374100  | -5.05859200 | -4.28246400 |
| C  | 1.52937400  | 1.78249900  | 2.07780000  |
| H  | 1.95761800  | 2.78450200  | 2.01056000  |
| H  | 0.55452900  | 1.78540100  | 1.57260900  |
| H  | 1.35056800  | 1.54601200  | 3.13269400  |
| C  | 3.89440500  | -2.40896600 | 1.14728400  |
| H  | 4.50496500  | -1.90591100 | 1.89939900  |
| H  | 3.77038700  | -3.45127900 | 1.47362000  |
| H  | 4.43393700  | -2.43295500 | 0.19479400  |
| O  | 2.90415100  | -0.76811600 | 3.27073800  |
| H  | 1.12463300  | -0.74379100 | 2.22832300  |
| C  | 2.37402000  | -1.75732300 | 4.15480200  |
| H  | 2.96611800  | -1.70205400 | 5.07028100  |
| H  | 1.32084500  | -1.55246100 | 4.38811800  |
| H  | 2.45653100  | -2.76831700 | 3.73475900  |
| O  | -0.89819700 | 0.16555300  | 0.25754600  |
| C  | -2.12379400 | 0.39402700  | 0.15155700  |
| C  | -2.63508200 | 1.70472200  | -0.20605400 |
| C  | -3.14395700 | -0.64066800 | 0.37993100  |
| C  | -4.00375500 | 1.96310500  | -0.33503000 |
| C  | -4.48110400 | -0.39140900 | 0.25627900  |
| C  | -5.01010000 | 0.93471600  | -0.11618400 |
| O  | -6.22825500 | 1.15717800  | -0.23276400 |
| Cl | -2.53762300 | -2.21127300 | 0.82530000  |
| Cl | -5.67740600 | -1.62282500 | 0.53004700  |
| C  | -1.66573800 | 2.72557200  | -0.42115600 |
| C  | -4.47906600 | 3.25715800  | -0.69090900 |
| N  | -0.86624100 | 3.55656000  | -0.59064100 |
| N  | -4.86073000 | 4.31877500  | -0.98242200 |

### MECP

E(B3LYP/BS1) = -

H(B3LYP/BS1) = -

G(B3LYP/BS1) = -

E(M06-2X/BS2//B3LYP/BS1) = -3590.594393 au

|   |           |            |            |
|---|-----------|------------|------------|
| 6 | 2.2101472 | -0.6637476 | 2.0433706  |
| 6 | 2.4202736 | 0.7363769  | 1.4800614  |
| 6 | 2.5658628 | -1.7324828 | 1.0215936  |
| 6 | 3.3837801 | 0.9385859  | 0.5261198  |
| 1 | 4.0320433 | 0.0946776  | 0.3003323  |
| 6 | 1.6046552 | -1.9545514 | 0.0441896  |
| 1 | 0.7079115 | -1.3415923 | 0.1348436  |
| 6 | 3.7274681 | 2.1511694  | -0.1937162 |
| 6 | 2.8033662 | 3.1826581  | -0.4898855 |
| 6 | 5.0550182 | 2.2807431  | -0.6724961 |

|    |            |            |            |
|----|------------|------------|------------|
| 6  | 3.2075425  | 4.3050882  | -1.2031364 |
| 1  | 1.7619577  | 3.0858112  | -0.2065708 |
| 6  | 5.4563676  | 3.4119043  | -1.3704506 |
| 1  | 5.7679000  | 1.4854010  | -0.4725326 |
| 6  | 4.5334900  | 4.4313841  | -1.6353389 |
| 1  | 2.4841683  | 5.0812658  | -1.4339146 |
| 1  | 6.4817158  | 3.5008995  | -1.7164391 |
| 1  | 4.8423685  | 5.3133806  | -2.1887984 |
| 6  | 1.5870133  | -2.8373973 | -1.0889669 |
| 6  | 2.5329658  | -3.8629318 | -1.3658872 |
| 6  | 0.5058825  | -2.6600385 | -2.0001882 |
| 6  | 2.4046024  | -4.6478650 | -2.5010808 |
| 1  | 3.3479060  | -4.0597497 | -0.6836733 |
| 6  | 0.3915443  | -3.4420444 | -3.1382205 |
| 1  | -0.2265369 | -1.8866051 | -1.7900391 |
| 6  | 1.3422823  | -4.4389380 | -3.3939012 |
| 1  | 3.1291322  | -5.4319523 | -2.6972263 |
| 1  | -0.4334316 | -3.2855790 | -3.8257876 |
| 1  | 1.2538053  | -5.0580435 | -4.2817364 |
| 6  | 1.5287828  | 1.7821726  | 2.0774962  |
| 1  | 1.9578306  | 2.7838212  | 2.0104813  |
| 1  | 0.5541534  | 1.7851530  | 1.5722463  |
| 1  | 1.3504035  | 1.5457032  | 3.1325517  |
| 6  | 3.8945438  | -2.4083867 | 1.1472600  |
| 1  | 4.5051598  | -1.9056749 | 1.8996756  |
| 1  | 3.7692945  | -3.4506559 | 1.4736067  |
| 1  | 4.4335980  | -2.4332150 | 0.1946465  |
| 8  | 2.9044294  | -0.7684315 | 3.2705652  |
| 1  | 1.1251151  | -0.7444876 | 2.2277312  |
| 6  | 2.3739597  | -1.7575770 | 4.1552181  |
| 1  | 2.9663393  | -1.7019150 | 5.0703491  |
| 1  | 1.3208841  | -1.5522465 | 4.3882153  |
| 1  | 2.4566315  | -2.7684464 | 3.7350889  |
| 8  | -0.8948268 | 0.1636015  | 0.2580688  |
| 6  | -2.1223886 | 0.3945435  | 0.1514325  |
| 6  | -2.6337832 | 1.7025770  | -0.2053228 |
| 6  | -3.1429585 | -0.6382914 | 0.3791446  |
| 6  | -4.0052728 | 1.9615767  | -0.3346126 |
| 6  | -4.4809120 | -0.3888541 | 0.2556412  |
| 6  | -5.0108264 | 0.9358449  | -0.1164506 |
| 8  | -6.2310747 | 1.1571120  | -0.2328708 |
| 17 | -2.5374185 | -2.2108735 | 0.8246739  |
| 17 | -5.6770880 | -1.6223970 | 0.5300004  |
| 6  | -1.6656760 | 2.7242840  | -0.4208879 |
| 6  | -4.4794103 | 3.2560108  | -0.6906274 |
| 7  | -0.8668669 | 3.5561544  | -0.5905752 |
| 7  | -4.8600770 | 4.3180396  | -0.9822591 |

### **3\_D**

E(B3LYP/BS1) = -850.3554464 au

H(B3LYP/BS1) = -849.967738 au

G(B3LYP/BS1) = -850.041271 au



E(M06-2X/BS2//B3LYP/BS1) = -850.1994928 au

|   |             |             |             |
|---|-------------|-------------|-------------|
| C | -0.02226600 | 2.10766500  | -0.35392500 |
| C | 1.24998900  | 1.30820700  | -0.61318600 |
| C | -1.09620700 | 1.25191300  | 0.30474000  |
| C | 1.58403900  | 0.29022200  | 0.23964400  |
| H | 0.95380400  | 0.16686400  | 1.11734600  |
| C | -1.77771900 | 0.39678300  | -0.54414900 |
| H | -1.46553900 | 0.44408000  | -1.58681700 |
| C | 2.70721500  | -0.62769000 | 0.20071400  |
| C | 3.38743100  | -1.00706100 | -0.98188400 |
| C | 3.11336900  | -1.21619900 | 1.42465300  |
| C | 4.44350600  | -1.90831200 | -0.93004800 |
| H | 3.06275300  | -0.62723300 | -1.94272800 |
| C | 4.17876400  | -2.10479300 | 1.47316000  |
| H | 2.58617200  | -0.95157300 | 2.33716000  |
| C | 4.85079900  | -2.45204700 | 0.29495400  |
| H | 4.94857900  | -2.19770000 | -1.84654500 |
| H | 4.48431800  | -2.53436500 | 2.42224100  |
| H | 5.67964700  | -3.15288600 | 0.32850200  |
| C | -2.81952300 | -0.56465500 | -0.30555600 |
| C | -3.51401200 | -0.74718900 | 0.92234900  |
| C | -3.18739000 | -1.38807100 | -1.40822000 |
| C | -4.50480900 | -1.71003500 | 1.03304700  |
| H | -3.29401200 | -0.12476900 | 1.77769300  |
| C | -4.17301700 | -2.35349700 | -1.28725000 |
| H | -2.67326700 | -1.25463800 | -2.35555400 |
| C | -4.83570500 | -2.51994500 | -0.06371400 |
| H | -5.03023300 | -1.83387700 | 1.97462400  |
| H | -4.43276200 | -2.97562600 | -2.13767000 |
| H | -5.61205400 | -3.27258600 | 0.03487600  |
| C | 2.04915400  | 1.78199800  | -1.79226500 |
| H | 3.11467100  | 1.56939400  | -1.68282200 |
| H | 1.70584200  | 1.31448800  | -2.72580800 |
| H | 1.92043500  | 2.86344500  | -1.90862200 |
| C | -1.29656600 | 1.39470300  | 1.78096600  |
| H | -0.51769000 | 2.02831400  | 2.20861900  |
| H | -2.26241900 | 1.87270900  | 1.99626500  |
| H | -1.29721100 | 0.42514900  | 2.29008300  |
| O | 0.32339400  | 3.27374800  | 0.36524400  |
| H | -0.40652900 | 2.39655500  | -1.34767000 |
| C | -0.59951300 | 4.35446900  | 0.20628800  |
| H | -0.19140200 | 5.19266700  | 0.77375700  |
| H | -0.69220700 | 4.63875400  | -0.85004800 |
| H | -1.59328000 | 4.10405600  | 0.59924500  |

### 3\_D1

E(B3LYP/BS1) = -1485.284423 au

H(B3LYP/BS1) = -1485.209595 au

G(B3LYP/BS1) = -1485.262837 au

E(M06-2X/BS2//B3LYP/BS1) = -1485.270249 au

|   |            |            |             |
|---|------------|------------|-------------|
| O | 0.13018200 | 2.72289000 | -0.00048800 |
| C | 0.13488000 | 1.47800800 | 0.00031800  |

|    |             |             |             |
|----|-------------|-------------|-------------|
| C  | 1.36384500  | 0.70009000  | 0.00013400  |
| C  | -1.10810700 | 0.68239800  | 0.00037000  |
| C  | 1.36375200  | -0.69996400 | 0.00010100  |
| C  | -1.10811400 | -0.68231000 | 0.00023300  |
| C  | 0.13474000  | -1.47762900 | 0.00020800  |
| O  | 0.12986600  | -2.72262000 | -0.00022600 |
| Cl | -2.58552700 | 1.60501000  | -0.00015600 |
| Cl | -2.58552300 | -1.60501200 | 0.00006500  |
| C  | 2.58222700  | 1.43646100  | -0.00013200 |
| C  | 2.58195600  | -1.43675000 | -0.00014100 |
| N  | 3.58283200  | 2.03421100  | 0.00040200  |
| N  | 3.58236600  | -2.03477200 | -0.00029800 |

### TS\_D

E(B3LYP/BS1) = -2335.634589 au

H(B3LYP/BS1) = -2335.176494 au

G(B3LYP/BS1) = -2335.283183 au

E(M06-2X/BS2//B3LYP/BS1) = -2335.477062 au

|   |             |             |             |
|---|-------------|-------------|-------------|
| C | -1.32106500 | 0.98452200  | 1.94911800  |
| C | -2.38661800 | 0.09213500  | 1.46282800  |
| C | -0.91253200 | 2.20746100  | 1.19106400  |
| C | -2.94523300 | 0.29060300  | 0.21460100  |
| H | -2.71734600 | 1.23596000  | -0.26990600 |
| C | -0.35515200 | 2.04761500  | -0.04254300 |
| H | -0.23098800 | 1.01959100  | -0.37945900 |
| C | -3.86121500 | -0.55029100 | -0.53518300 |
| C | -3.93872300 | -1.95816800 | -0.41498400 |
| C | -4.69302300 | 0.08006800  | -1.49234600 |
| C | -4.83151600 | -2.68788500 | -1.19399800 |
| H | -3.26845000 | -2.48540500 | 0.25356900  |
| C | -5.59360800 | -0.65149200 | -2.25732000 |
| H | -4.62957300 | 1.15808000  | -1.61594600 |
| C | -5.66987700 | -2.04066000 | -2.10808600 |
| H | -4.86751100 | -3.76902000 | -1.09560800 |
| H | -6.23117000 | -0.14392200 | -2.97539500 |
| H | -6.36701200 | -2.61634700 | -2.71012000 |
| C | 0.07745700  | 3.02614200  | -1.04030300 |
| C | 0.36141800  | 4.38475800  | -0.78066900 |
| C | 0.24865700  | 2.56082900  | -2.36388100 |
| C | 0.77368600  | 5.23490300  | -1.80502800 |
| H | 0.29355900  | 4.77770200  | 0.22497400  |
| C | 0.65013100  | 3.41424600  | -3.38655300 |
| H | 0.05227900  | 1.51450200  | -2.58390000 |
| C | 0.91217000  | 4.75963200  | -3.11158900 |
| H | 0.99409100  | 6.27436900  | -1.57860900 |
| H | 0.76443400  | 3.03015000  | -4.39624400 |
| H | 1.23122300  | 5.42850100  | -3.90581800 |
| C | -2.80551600 | -1.02529400 | 2.38808400  |
| H | -3.81798000 | -1.36368100 | 2.16086800  |
| H | -2.13008800 | -1.88456700 | 2.30203000  |
| H | -2.77069300 | -0.68444900 | 3.42399000  |
| C | -1.20572100 | 3.53801800  | 1.84657400  |

|    |             |             |             |
|----|-------------|-------------|-------------|
| H  | -1.90683200 | 3.40880200  | 2.67387600  |
| H  | -0.30643500 | 4.01991100  | 2.24963500  |
| H  | -1.64500600 | 4.22945700  | 1.11996000  |
| O  | -1.35464000 | 1.11815700  | 3.33580000  |
| H  | -0.30611400 | 0.06852100  | 1.74060000  |
| C  | -0.12426000 | 1.39431900  | 4.01611300  |
| H  | -0.39405900 | 1.55728500  | 5.06075200  |
| H  | 0.55430400  | 0.53953500  | 3.93733400  |
| H  | 0.37040700  | 2.28860000  | 3.62562900  |
| O  | 0.39683700  | -0.99542200 | 1.77780400  |
| C  | 1.34249000  | -1.32545100 | 0.96024400  |
| C  | 1.25503400  | -2.59489900 | 0.29419200  |
| C  | 2.51675000  | -0.51971800 | 0.71303100  |
| C  | 2.24334400  | -3.02815900 | -0.58815600 |
| C  | 3.49911300  | -0.93461000 | -0.15455400 |
| C  | 3.42213900  | -2.21600600 | -0.87358600 |
| O  | 4.30129500  | -2.59125500 | -1.66605900 |
| Cl | 2.65882400  | 0.96781300  | 1.59600600  |
| Cl | 4.91334700  | 0.01135800  | -0.45251900 |
| C  | 0.09732900  | -3.39032300 | 0.55442900  |
| C  | 2.14169400  | -4.27824800 | -1.26205700 |
| N  | -0.84614200 | -4.03966500 | 0.76016000  |
| N  | 2.05614200  | -5.30113400 | -1.81137200 |

#### 4\_D

E(B3LYP/BS1) = -2335.662503au

H(B3LYP/BS1) = -2335.199484 au

G(B3LYP/BS1) = -2335.306852 au

E(M06-2X/BS2//B3LYP/BS1) = -2335.508779 au

|   |             |             |             |
|---|-------------|-------------|-------------|
| C | -2.00449300 | -0.03616700 | 2.12216900  |
| C | -2.84220700 | -0.93112700 | 1.37604600  |
| C | -1.59538300 | 1.30369200  | 1.76115400  |
| C | -3.72028100 | -0.44502900 | 0.41923800  |
| H | -3.83494800 | 0.63522200  | 0.37924300  |
| C | -1.48039700 | 1.66930500  | 0.42982700  |
| H | -1.68740300 | 0.87771700  | -0.28633100 |
| C | -4.57926300 | -1.15529000 | -0.51619400 |
| C | -4.34496100 | -2.46559900 | -0.99605300 |
| C | -5.70694800 | -0.46888000 | -1.02866900 |
| C | -5.21218600 | -3.06116800 | -1.90954100 |
| H | -3.46178600 | -3.00819000 | -0.68034200 |
| C | -6.57472400 | -1.06893000 | -1.93499200 |
| H | -5.89848600 | 0.54771000  | -0.69323700 |
| C | -6.33569100 | -2.37405400 | -2.37858900 |
| H | -5.00294000 | -4.06655500 | -2.26553500 |
| H | -7.43716100 | -0.51787600 | -2.30066400 |
| H | -7.00918300 | -2.84422900 | -3.08961400 |
| C | -1.17406300 | 2.93984500  | -0.22018900 |
| C | -0.78145900 | 4.14329700  | 0.41449100  |
| C | -1.27178500 | 2.96369300  | -1.63463100 |
| C | -0.51567600 | 5.29331600  | -0.32733000 |
| H | -0.67134600 | 4.19043200  | 1.48845900  |

|    |             |             |             |
|----|-------------|-------------|-------------|
| C  | -1.00941200 | 4.11363000  | -2.37036800 |
| H  | -1.56682500 | 2.05469900  | -2.15337100 |
| C  | -0.62909800 | 5.29169500  | -1.71978100 |
| H  | -0.21514600 | 6.19986200  | 0.19140400  |
| H  | -1.10079400 | 4.09183800  | -3.45300900 |
| H  | -0.42100200 | 6.19283800  | -2.28953800 |
| C  | -2.79473500 | -2.39870500 | 1.75865500  |
| H  | -3.74017400 | -2.90054800 | 1.54145000  |
| H  | -1.99973600 | -2.92953000 | 1.21753300  |
| H  | -2.58248300 | -2.50114000 | 2.82419800  |
| C  | -1.30914300 | 2.25747700  | 2.90627100  |
| H  | -1.52812600 | 1.78593100  | 3.86483500  |
| H  | -0.26658800 | 2.59580300  | 2.92224700  |
| H  | -1.94036100 | 3.14915200  | 2.81953100  |
| O  | -1.61957900 | -0.49478600 | 3.36794200  |
| H  | 0.55440200  | 0.39886300  | 0.36322800  |
| C  | -0.21686700 | -0.69855200 | 3.58385700  |
| H  | -0.11397400 | -1.02190500 | 4.62169300  |
| H  | 0.16586200  | -1.47796400 | 2.91581900  |
| H  | 0.35841300  | 0.22164400  | 3.43406900  |
| O  | 0.80946500  | -0.54365400 | 0.24373700  |
| C  | 2.09260300  | -0.71569400 | -0.03447100 |
| C  | 2.52497100  | -2.05993300 | -0.20390600 |
| C  | 3.02484700  | 0.35631200  | -0.16340200 |
| C  | 3.85626400  | -2.33668000 | -0.50484300 |
| C  | 4.34624800  | 0.10297500  | -0.46000500 |
| C  | 4.84571900  | -1.26787500 | -0.65166300 |
| O  | 6.03121300  | -1.51078200 | -0.91977400 |
| Cl | 2.41939800  | 1.96715300  | 0.06535100  |
| Cl | 5.49609500  | 1.36822000  | -0.62497500 |
| C  | 1.56056600  | -3.10454100 | -0.05318900 |
| C  | 4.31467000  | -3.67242700 | -0.68237400 |
| N  | 0.77693700  | -3.95396500 | 0.07298800  |
| N  | 4.68948000  | -4.76444300 | -0.82767600 |

**Fig. 2 (a)**

**5**

E(B3LYP/BS1) = -849.7965245 au

H(B3LYP/BS1) = -849.41832 au

G(B3LYP/BS1) = -849.488803 au

E(M06-2X/BS2//B3LYP/BS1) = -849.6468837 au

|   |             |             |             |
|---|-------------|-------------|-------------|
| C | -0.06159300 | 2.10163300  | 0.02370800  |
| C | 1.25843800  | 1.56275300  | -0.16872400 |
| C | -1.23975700 | 1.31933400  | 0.38506000  |
| C | 1.51748500  | 0.31428400  | 0.36234600  |
| H | 0.74783100  | -0.10436000 | 1.00322400  |
| C | -1.45163900 | 0.16448200  | -0.32127000 |
| H | -0.71423800 | -0.05871200 | -1.08718400 |
| C | 2.69502800  | -0.52073200 | 0.25406500  |
| C | 3.65848000  | -0.42385900 | -0.77769500 |
| C | 2.85495500  | -1.53493600 | 1.22881800  |

|   |             |             |             |
|---|-------------|-------------|-------------|
| C | 4.74490800  | -1.29064100 | -0.80960300 |
| H | 3.53763900  | 0.29887700  | -1.57451700 |
| C | 3.95355500  | -2.38501100 | 1.20374600  |
| H | 2.10972000  | -1.63694500 | 2.01295500  |
| C | 4.90292300  | -2.26320700 | 0.18393900  |
| H | 5.46957400  | -1.21349900 | -1.61431000 |
| H | 4.06703400  | -3.14754900 | 1.96800200  |
| H | 5.75752600  | -2.93276200 | 0.15528800  |
| C | -2.52250200 | -0.82105900 | -0.26680100 |
| C | -3.71527400 | -0.70595300 | 0.48251000  |
| C | -2.33968400 | -1.98574100 | -1.04850400 |
| C | -4.66729900 | -1.72082300 | 0.45583900  |
| H | -3.91776900 | 0.17828300  | 1.07020100  |
| C | -3.28811200 | -3.00192200 | -1.06348100 |
| H | -1.43493800 | -2.08720900 | -1.64179200 |
| C | -4.45725800 | -2.87236200 | -0.30873400 |
| H | -5.58019600 | -1.61158300 | 1.03362200  |
| H | -3.12045000 | -3.88968100 | -1.66572700 |
| H | -5.20420400 | -3.66071000 | -0.32103800 |
| C | 2.29391900  | 2.43299800  | -0.84552900 |
| H | 3.29707600  | 2.20260200  | -0.48227100 |
| H | 2.28235500  | 2.29441700  | -1.93375900 |
| H | 2.09242400  | 3.48729800  | -0.65091200 |
| C | -2.10903600 | 1.84649100  | 1.51054000  |
| H | -1.60567700 | 2.64783600  | 2.05628200  |
| H | -3.07740500 | 2.22625100  | 1.16699000  |
| H | -2.30032500 | 1.04204700  | 2.22764600  |
| O | -0.14372200 | 3.40563100  | -0.13781100 |
| C | -1.39679900 | 4.09816300  | -0.36783700 |
| H | -1.13229800 | 4.95349800  | -0.98817900 |
| H | -2.09931000 | 3.44585000  | -0.88887300 |
| H | -1.80901800 | 4.43765000  | 0.58249400  |

### TS<sub>5-6</sub>

E(B3LYP/BS1) = -849.7756265 au

H(B3LYP/BS1) = -849.400241 au

G(B3LYP/BS1) = -849.469144 au

E(M06-2X/BS2//B3LYP/BS1) = -849.6318092 au

|   |             |             |             |
|---|-------------|-------------|-------------|
| C | -2.43634300 | -0.58256500 | -0.15853000 |
| C | -1.41867400 | -1.53215900 | -0.38242700 |
| C | -1.96227300 | 0.72306400  | 0.09434200  |
| C | -0.12937800 | -0.95302800 | -0.61794400 |
| H | -0.08082500 | -0.26201800 | -1.45459800 |
| C | -0.57948400 | 0.74255700  | 0.48316300  |
| H | -0.34175200 | 0.13437800  | 1.35118400  |
| C | 1.14818100  | -1.60712600 | -0.32151300 |
| C | 1.30876200  | -2.48027500 | 0.77290600  |
| C | 2.26362300  | -1.32017600 | -1.13154700 |
| C | 2.54354000  | -3.06824800 | 1.02929600  |
| H | 0.46989900  | -2.68636800 | 1.43136800  |
| C | 3.49739400  | -1.91305900 | -0.87491700 |

|   |             |             |             |
|---|-------------|-------------|-------------|
| H | 2.15445700  | -0.63695500 | -1.96957400 |
| C | 3.63868800  | -2.78930000 | 0.20419400  |
| H | 2.65627300  | -3.73872700 | 1.87587700  |
| H | 4.34747400  | -1.69010500 | -1.51250600 |
| H | 4.60158100  | -3.24838400 | 0.40835400  |
| C | 0.34055100  | 1.87246500  | 0.29468300  |
| C | 0.32672900  | 2.67248200  | -0.86512000 |
| C | 1.30704900  | 2.12997200  | 1.28464200  |
| C | 1.23505800  | 3.71677200  | -1.01200100 |
| H | -0.38305600 | 2.46518400  | -1.66127300 |
| C | 2.21045400  | 3.18060200  | 1.13875800  |
| H | 1.33946300  | 1.50786700  | 2.17509700  |
| C | 2.17450700  | 3.97688700  | -0.00831000 |
| H | 1.21686600  | 4.32428800  | -1.91175900 |
| H | 2.94386200  | 3.37414600  | 1.91565300  |
| H | 2.88240900  | 4.79201500  | -0.12653900 |
| C | -1.71522300 | -2.99908700 | -0.36042600 |
| H | -0.84969600 | -3.59864300 | -0.64218900 |
| H | -2.07328800 | -3.31938400 | 0.62586200  |
| H | -2.53288800 | -3.19859200 | -1.06368500 |
| C | -2.79963500 | 1.95558500  | -0.08843500 |
| H | -3.39049600 | 1.90961800  | -1.00886500 |
| H | -3.50231100 | 2.05664800  | 0.74815300  |
| H | -2.18496900 | 2.85507900  | -0.09893800 |
| O | -3.71091800 | -0.99020800 | -0.25353700 |
| C | -4.72421800 | -0.42481300 | 0.60393600  |
| H | -5.49994600 | -1.18737500 | 0.67696000  |
| H | -4.31630200 | -0.21629000 | 1.59667600  |
| H | -5.14526400 | 0.48198900  | 0.16454000  |

## 6

E(B3LYP/BS1) = -849.7961841 au

H(B3LYP/BS1) = -849.419816 au

G(B3LYP/BS1) = -849.4909 au

E(M06-2X/BS2//B3LYP/BS1) = -849.6576538 au

|   |             |             |             |
|---|-------------|-------------|-------------|
| C | 0.53860400  | 2.29007200  | 0.23509600  |
| C | 1.24497600  | 1.24004500  | 0.82881100  |
| C | -0.57817200 | 1.79804200  | -0.44774100 |
| C | 0.55773600  | -0.06616500 | 0.57803200  |
| H | 0.07350000  | -0.33473300 | 1.52888200  |
| C | -0.58392300 | 0.29880900  | -0.43373800 |
| H | -0.24437500 | -0.00622000 | -1.43516200 |
| C | 1.47055800  | -1.21638600 | 0.18364100  |
| C | 2.29690600  | -1.12253900 | -0.94663200 |
| C | 1.48807700  | -2.39068900 | 0.94503700  |
| C | 3.12429400  | -2.18619900 | -1.30566400 |
| H | 2.29708200  | -0.21866300 | -1.55223900 |
| C | 2.31494100  | -3.45657200 | 0.58373400  |
| H | 0.85126400  | -2.47446000 | 1.82191400  |
| C | 3.13515200  | -3.35613100 | -0.54090800 |
| H | 3.75929400  | -2.10133900 | -2.18277800 |

|   |             |             |             |
|---|-------------|-------------|-------------|
| H | 2.31653000  | -4.36273800 | 1.18253100  |
| H | 3.77908400  | -4.18432500 | -0.82224400 |
| C | -1.92980300 | -0.35959400 | -0.18000000 |
| C | -2.66566300 | -0.06508200 | 0.97799800  |
| C | -2.44244200 | -1.28523800 | -1.09613500 |
| C | -3.89176300 | -0.68734800 | 1.21203100  |
| H | -2.28381500 | 0.65186800  | 1.70189300  |
| C | -3.66839400 | -1.91096900 | -0.85962600 |
| H | -1.88047600 | -1.52119700 | -1.99622400 |
| C | -4.39544300 | -1.61280300 | 0.29383400  |
| H | -4.45224400 | -0.45011300 | 2.11166900  |
| H | -4.05271000 | -2.62960400 | -1.57768500 |
| H | -5.34939500 | -2.09837200 | 0.47809600  |
| C | 2.47939900  | 1.39467300  | 1.62161800  |
| H | 3.32574500  | 0.99218800  | 1.04603200  |
| H | 2.67702400  | 2.44191500  | 1.85557000  |
| H | 2.42823200  | 0.79763600  | 2.53973300  |
| C | -1.59926600 | 2.63129600  | -1.11103400 |
| H | -1.52139000 | 3.67958100  | -0.81708000 |
| H | -1.46422400 | 2.55892800  | -2.20133200 |
| H | -2.60352800 | 2.24817100  | -0.90293200 |
| O | 0.84634200  | 3.59869500  | 0.39940300  |
| C | 1.52184500  | 4.23129100  | -0.71266900 |
| H | 1.67352300  | 5.26776100  | -0.41243300 |
| H | 2.48692100  | 3.74975400  | -0.89799200 |
| H | 0.90751400  | 4.19332600  | -1.61756000 |

#### DDQH-

E(B3LYP/BS1) = -1485.89077 au

H(B3LYP/BS1) = -1485.80373 au

G(B3LYP/BS1) = -1485.856894 au

E(M06-2X/BS2//B3LYP/BS1) = -1485.887946 au

|    |             |             |             |
|----|-------------|-------------|-------------|
| H  | 0.74392200  | 3.09753700  | 0.00014200  |
| O  | -0.16609200 | 2.75330800  | 0.00026800  |
| C  | -0.12729400 | 1.39052600  | 0.00058800  |
| C  | -1.33138000 | 0.68710700  | 0.00043700  |
| C  | 1.07542400  | 0.64543600  | 0.00069600  |
| C  | -1.35296700 | -0.73709800 | 0.00034100  |
| C  | 1.07549100  | -0.73887600 | 0.00059100  |
| C  | -0.14887900 | -1.53968300 | 0.00041100  |
| O  | -0.14507400 | -2.79197100 | 0.00024200  |
| Cl | 2.57584800  | 1.56776500  | -0.00013200 |
| Cl | 2.57443600  | -1.63332200 | -0.00063100 |
| C  | -2.55181300 | 1.42797700  | -0.00034200 |
| C  | -2.58895300 | -1.43293900 | 0.00007000  |
| N  | -3.55271600 | 2.02380100  | -0.00102700 |
| N  | -3.60545700 | -2.00786800 | -0.00011800 |

7

E(B3LYP/BS1) = -2335.71063 au

H(B3LYP/BS1) = -2335.244529 au

G(B3LYP/BS1) = -2335.348995 au

E(M06-2X/BS2//B3LYP/BS1) = -2335.573339 au

|    |             |             |             |
|----|-------------|-------------|-------------|
| H  | 6.45253400  | 1.01897500  | -0.32278000 |
| O  | 6.08751500  | 0.15043300  | -0.07661800 |
| C  | 4.73873900  | 0.17026700  | -0.20670500 |
| C  | 4.02749200  | -0.99459200 | 0.09222500  |
| C  | 4.01258600  | 1.30528300  | -0.63388800 |
| C  | 2.61108400  | -1.03103800 | -0.01890500 |
| C  | 2.62937600  | 1.28214900  | -0.74451700 |
| C  | 1.83910600  | 0.10743100  | -0.43217600 |
| O  | 0.57138800  | 0.08898200  | -0.53345000 |
| Cl | 4.94155000  | 2.74167600  | -1.01994000 |
| Cl | 1.76217400  | 2.68365000  | -1.30830100 |
| C  | 4.75186500  | -2.15094200 | 0.51239400  |
| C  | 1.90945700  | -2.23403800 | 0.26621200  |
| N  | 5.33283800  | -3.09917000 | 0.85681200  |
| N  | 1.34257200  | -3.22927800 | 0.48807200  |
| C  | -0.96760800 | -0.74899500 | 1.82899100  |
| C  | -1.90573800 | -1.61279200 | 1.28418900  |
| C  | -1.08160200 | 0.53052800  | 1.24060400  |
| C  | -2.79901600 | -0.87428300 | 0.31442100  |
| H  | -3.78817500 | -0.79649600 | 0.78774700  |
| C  | -2.18097500 | 0.55798100  | 0.22823600  |
| H  | -1.68150000 | 0.66953800  | -0.74088100 |
| C  | -2.99180800 | -1.58507800 | -1.01936500 |
| C  | -1.89685700 | -1.85022900 | -1.85677100 |
| C  | -4.27033800 | -1.98744800 | -1.42370800 |
| C  | -2.08549000 | -2.50392300 | -3.07455200 |
| H  | -0.90188800 | -1.53173000 | -1.55439700 |
| C  | -4.45829900 | -2.64122500 | -2.64437900 |
| H  | -5.12574700 | -1.78573900 | -0.78317300 |
| C  | -3.36551700 | -2.90212900 | -3.47209200 |
| H  | -1.23063000 | -2.70315500 | -3.71529800 |
| H  | -5.45744400 | -2.94446500 | -2.94511800 |
| H  | -3.50874000 | -3.41094800 | -4.42140900 |
| C  | -3.16150200 | 1.71075100  | 0.39484900  |
| C  | -3.90420500 | 1.86285800  | 1.57572000  |
| C  | -3.34026200 | 2.63700000  | -0.63947700 |
| C  | -4.80621800 | 2.91730600  | 1.71628100  |
| H  | -3.77896800 | 1.15401500  | 2.39147100  |
| C  | -4.24480800 | 3.69274600  | -0.50116600 |
| H  | -2.77162100 | 2.53001300  | -1.55971700 |
| C  | -4.97914700 | 3.83594700  | 0.67696800  |
| H  | -5.37353900 | 3.02157900  | 2.63698600  |
| H  | -4.37350400 | 4.40113500  | -1.31480100 |
| H  | -5.68243200 | 4.65673700  | 0.78615800  |
| C  | -2.08422300 | -3.07503200 | 1.51819000  |
| H  | -2.97516100 | -3.44305200 | 1.00535300  |
| H  | -1.21222600 | -3.61776600 | 1.12869600  |
| H  | -2.16691000 | -3.31798000 | 2.58120600  |
| C  | -0.36380200 | 1.72551200  | 1.73416800  |
| H  | 0.65194500  | 1.47177600  | 2.04515600  |
| H  | -0.35007100 | 2.52426800  | 0.99185800  |



|   |             |             |            |
|---|-------------|-------------|------------|
| H | -0.89041800 | 2.09715600  | 2.62692000 |
| O | 0.00533900  | -0.91354300 | 2.74924600 |
| C | 0.03093200  | -2.06431800 | 3.60511400 |
| H | 0.84680400  | -1.87928100 | 4.30472700 |
| H | -0.90693000 | -2.15778200 | 4.16125700 |
| H | 0.24018700  | -2.97335200 | 3.03735500 |

8

E(B3LYP/BS1) = -2335.707918 au

H(B3LYP/BS1) = -2335.242777 au

G(B3LYP/BS1) = -2335.352179 au

E(M06-2X/BS2//B3LYP/BS1) = -2335.568306 au

|    |             |             |             |
|----|-------------|-------------|-------------|
| H  | 6.56461800  | 1.09674600  | 0.17084800  |
| O  | 6.29530500  | 0.16235300  | 0.12982800  |
| C  | 4.93840800  | 0.08260300  | 0.15561500  |
| C  | 4.34451800  | -1.17915500 | 0.10232900  |
| C  | 4.09141400  | 1.21127900  | 0.23574200  |
| C  | 2.92931600  | -1.32284000 | 0.12643200  |
| C  | 2.70973100  | 1.08610900  | 0.25797700  |
| C  | 2.03474000  | -0.19871600 | 0.20407500  |
| O  | 0.77475000  | -0.32197000 | 0.22401100  |
| Cl | 4.87182500  | 2.78338600  | 0.30661800  |
| Cl | 1.69160000  | 2.49904700  | 0.35898800  |
| C  | 5.18587400  | -2.32982700 | 0.02360400  |
| C  | 2.33837400  | -2.61337500 | 0.07734400  |
| N  | 5.86303600  | -3.27498800 | -0.04031500 |
| N  | 1.84573700  | -3.67061600 | 0.04077900  |
| C  | -2.25615500 | -2.37980100 | -0.14919700 |
| C  | -1.93837800 | -1.51812000 | 0.90950900  |
| C  | -2.79513300 | -1.66073800 | -1.21194400 |
| C  | -2.23336600 | -0.10326700 | 0.54008200  |
| H  | -1.22984900 | 0.31771400  | 0.35399200  |
| C  | -2.97771100 | -0.21891400 | -0.83221900 |
| H  | -4.05407000 | -0.09721400 | -0.63834800 |
| C  | -2.91738500 | 0.73293600  | 1.60783900  |
| C  | -4.16008200 | 0.35032400  | 2.13538000  |
| C  | -2.31524400 | 1.90850300  | 2.07198100  |
| C  | -4.78813400 | 1.13104200  | 3.10578700  |
| H  | -4.64104200 | -0.56190600 | 1.78825100  |
| C  | -2.94491500 | 2.69191900  | 3.04186100  |
| H  | -1.35036800 | 2.21068000  | 1.67311900  |
| C  | -4.18186300 | 2.30531600  | 3.56064000  |
| H  | -5.74987900 | 0.82246000  | 3.50592000  |
| H  | -2.46689100 | 3.60286700  | 3.39095800  |
| H  | -4.67174200 | 2.91419300  | 4.31526400  |
| C  | -2.58513000 | 0.78523300  | -1.90498500 |
| C  | -1.24777700 | 0.91205300  | -2.31159400 |
| C  | -3.56262600 | 1.58276700  | -2.51182000 |
| C  | -0.90214100 | 1.82359400  | -3.30985100 |
| H  | -0.47533300 | 0.31505600  | -1.83194500 |
| C  | -3.21394300 | 2.49614800  | -3.50935100 |
| H  | -4.60094100 | 1.49295300  | -2.20176200 |

|   |             |             |             |
|---|-------------|-------------|-------------|
| C | -1.88296100 | 2.61675700  | -3.91188900 |
| H | 0.13643000  | 1.91637100  | -3.61505300 |
| H | -3.98246300 | 3.11175300  | -3.96836600 |
| H | -1.60966600 | 3.32684200  | -4.68738500 |
| C | -1.29265000 | -1.92490600 | 2.16789300  |
| H | -1.75436000 | -1.43192300 | 3.02930700  |
| H | -1.27868900 | -3.00803100 | 2.29648000  |
| H | -0.25675900 | -1.55630900 | 2.10293600  |
| C | -3.14209900 | -2.22362400 | -2.53359900 |
| H | -2.81073000 | -3.25838900 | -2.63412600 |
| H | -4.23069100 | -2.17512500 | -2.68051700 |
| H | -2.70065000 | -1.61127600 | -3.32826900 |
| O | -1.97124900 | -3.70701300 | -0.15723400 |
| C | -3.08662900 | -4.58222600 | 0.11577000  |
| H | -2.69114500 | -5.59568600 | 0.04785500  |
| H | -3.48047100 | -4.40208000 | 1.12143200  |
| H | -3.88371400 | -4.44521500 | -0.62242900 |

**Fig. 2 (b)**

TS<sub>7-9</sub>

E(B3LYP/BS1) = -2335.701661 au

H(B3LYP/BS1) = -2335.241159 au

G(B3LYP/BS1) = -2335.348813 au

E(M06-2X/BS2//B3LYP/BS1) = -2335.56179 au

|    |             |             |             |
|----|-------------|-------------|-------------|
| H  | 6.45837000  | 1.38445700  | 0.99819200  |
| O  | 6.31954700  | 0.47135200  | 0.68903000  |
| C  | 5.04354000  | 0.31953700  | 0.26777200  |
| C  | 4.65446900  | -0.93226000 | -0.21919100 |
| C  | 4.08561900  | 1.35616200  | 0.29135700  |
| C  | 3.32908600  | -1.14745200 | -0.68257800 |
| C  | 2.78229300  | 1.14668300  | -0.14758700 |
| C  | 2.34607100  | -0.11900800 | -0.66134000 |
| O  | 1.13326200  | -0.29145800 | -1.08847400 |
| Cl | 4.60483800  | 2.90969200  | 0.90635300  |
| Cl | 1.60915400  | 2.42906000  | -0.09662800 |
| C  | 5.61412300  | -1.98859600 | -0.24874700 |
| C  | 2.95263200  | -2.41880300 | -1.20345400 |
| N  | 6.38960800  | -2.85609700 | -0.27569100 |
| N  | 2.64050400  | -3.45641300 | -1.63204300 |
| C  | -2.43242000 | -1.75964000 | -1.35666600 |
| C  | -1.62074900 | -1.51330600 | -0.20663000 |
| C  | -3.45089300 | -0.84920800 | -1.45421400 |
| C  | -2.18614900 | -0.33583500 | 0.55269100  |
| H  | -1.42076600 | 0.44907000  | 0.53357300  |
| C  | -3.41988100 | 0.12709100  | -0.30142100 |
| H  | -4.33906500 | -0.00546400 | 0.28314000  |
| C  | -2.49697100 | -0.64655600 | 2.01077000  |
| C  | -3.39621100 | -1.66786200 | 2.35325000  |
| C  | -1.88902600 | 0.09043500  | 3.03384500  |
| C  | -3.68248700 | -1.94142800 | 3.69059300  |
| H  | -3.87469700 | -2.25473500 | 1.57244600  |

|   |             |             |             |
|---|-------------|-------------|-------------|
| C | -2.17583400 | -0.18218600 | 4.37391200  |
| H | -1.19049500 | 0.88440400  | 2.78200300  |
| C | -3.07277000 | -1.19852600 | 4.70565800  |
| H | -4.38008100 | -2.73622400 | 3.93991600  |
| H | -1.69742400 | 0.40130000  | 5.15565100  |
| H | -3.29603200 | -1.41197400 | 5.74722000  |
| C | -3.36241500 | 1.58429500  | -0.74825300 |
| C | -2.27887700 | 2.06136800  | -1.50247700 |
| C | -4.39570900 | 2.46770000  | -0.41558400 |
| C | -2.23198800 | 3.39497200  | -1.90908800 |
| H | -1.46261200 | 1.39287300  | -1.76720200 |
| C | -4.34940400 | 3.80375700  | -0.82227600 |
| H | -5.24027000 | 2.11083100  | 0.16890100  |
| C | -3.26796200 | 4.27042700  | -1.57070800 |
| H | -1.38597000 | 3.74991300  | -2.49106500 |
| H | -5.15836700 | 4.47696800  | -0.55213400 |
| H | -3.23022800 | 5.30885100  | -1.88783900 |
| C | -0.38763600 | -2.12086300 | 0.07835400  |
| H | -0.04068100 | -2.05414300 | 1.11091100  |
| H | -0.17618900 | -3.06984800 | -0.41302300 |
| H | 0.38453600  | -1.29056700 | -0.50910600 |
| C | -4.46177700 | -0.79046500 | -2.54097500 |
| H | -4.28481000 | -1.56123400 | -3.29387800 |
| H | -5.47136500 | -0.91453700 | -2.12695700 |
| H | -4.44311800 | 0.19453500  | -3.02331000 |
| O | -2.15485100 | -2.72870100 | -2.27592300 |
| C | -2.67798100 | -4.03305900 | -1.95878600 |
| H | -2.34390400 | -4.69416500 | -2.75936900 |
| H | -2.29037600 | -4.39203500 | -0.99920400 |
| H | -3.77293200 | -4.01327400 | -1.92647900 |

### TS<sub>8-10</sub>

E(B3LYP/BS1) = -2335.710569 au

H(B3LYP/BS1) = -2335.245291 au

G(B3LYP/BS1) = -2335.346464 au

E(M06-2X/BS2//B3LYP/BS1) = -2335.573526 au

|    |             |             |             |
|----|-------------|-------------|-------------|
| H  | 6.40650600  | 0.98583200  | -0.32392200 |
| O  | 6.03553600  | 0.12547600  | -0.05803900 |
| C  | 4.68998500  | 0.14448000  | -0.20021400 |
| C  | 3.97652000  | -1.01614600 | 0.11542400  |
| C  | 3.96900200  | 1.26938100  | -0.65804400 |
| C  | 2.56214500  | -1.05294900 | -0.00399100 |
| C  | 2.58497500  | 1.24301100  | -0.77728800 |
| C  | 1.79837300  | 0.07805500  | -0.44021500 |
| O  | 0.52397300  | 0.05555500  | -0.55292700 |
| Cl | 4.89991400  | 2.69477200  | -1.07212600 |
| Cl | 1.72659100  | 2.62538700  | -1.39613700 |
| C  | 4.69846900  | -2.16515700 | 0.55955200  |
| C  | 1.86273900  | -2.25842300 | 0.28445200  |
| N  | 5.27835500  | -3.10661400 | 0.92328300  |
| N  | 1.30650400  | -3.25905000 | 0.50554000  |
| C  | -0.91366900 | -0.73041500 | 1.77050000  |

|   |             |             |             |
|---|-------------|-------------|-------------|
| C | -1.90194600 | -1.56866700 | 1.29503100  |
| C | -0.97574200 | 0.53387300  | 1.12595400  |
| C | -2.78844600 | -0.83411800 | 0.31301400  |
| H | -3.77049100 | -0.71279600 | 0.79119600  |
| C | -2.13122900 | 0.57806100  | 0.16993700  |
| H | -1.69577800 | 0.67216900  | -0.82966600 |
| C | -3.01759900 | -1.58147200 | -0.99522700 |
| C | -1.94274400 | -1.90705400 | -1.83727500 |
| C | -4.31225900 | -1.95910800 | -1.37166400 |
| C | -2.16587000 | -2.59434500 | -3.03052600 |
| H | -0.93543300 | -1.60885900 | -1.55728700 |
| C | -4.53550900 | -2.64695300 | -2.56749400 |
| H | -5.15316000 | -1.71105800 | -0.72810000 |
| C | -3.46194500 | -2.96741800 | -3.39944400 |
| H | -1.32544000 | -2.83985100 | -3.67439300 |
| H | -5.54703800 | -2.93021400 | -2.84567800 |
| H | -3.63232100 | -3.50289100 | -4.32945800 |
| C | -3.07254100 | 1.75574600  | 0.38896800  |
| C | -3.76372200 | 1.91689700  | 1.59975000  |
| C | -3.26678000 | 2.69780300  | -0.62828500 |
| C | -4.62990500 | 2.99414900  | 1.78579800  |
| H | -3.62626000 | 1.19710800  | 2.40388800  |
| C | -4.13545800 | 3.77662400  | -0.44463000 |
| H | -2.73879300 | 2.58468800  | -1.57178200 |
| C | -4.81864900 | 3.92793100  | 0.76283100  |
| H | -5.15717800 | 3.10430500  | 2.72938500  |
| H | -4.27663100 | 4.49628300  | -1.24628300 |
| H | -5.49426200 | 4.76633700  | 0.90737300  |
| C | -2.14679000 | -3.01032500 | 1.60293600  |
| H | -3.06489700 | -3.35624000 | 1.12303300  |
| H | -1.31318800 | -3.61707600 | 1.22526700  |
| H | -2.22527100 | -3.20065700 | 2.67694800  |
| C | -0.25078800 | 1.72833300  | 1.61850500  |
| H | 0.76823100  | 1.47496100  | 1.91894400  |
| H | -0.24361800 | 2.53090800  | 0.88080200  |
| H | -0.76964300 | 2.09349200  | 2.51781600  |
| O | 0.07782400  | -0.89795800 | 2.67376600  |
| C | 0.04896200  | -1.98961300 | 3.60201800  |
| H | 0.88629600  | -1.81200900 | 4.27804000  |
| H | -0.88390500 | -1.98958200 | 4.17459100  |
| H | 0.19151600  | -2.94556400 | 3.09337200  |

9

E(B3LYP/BS1) = -849.3647303 au

H(B3LYP/BS1) = -849.000235 au

G(B3LYP/BS1) = -849.070471 au

E(M06-2X/BS2//B3LYP/BS1) = -849.2453483 au

|   |             |             |             |
|---|-------------|-------------|-------------|
| C | 0.50407100  | 2.29616100  | 0.22882200  |
| C | 1.25563700  | 1.24996500  | 0.92576700  |
| C | -0.50101300 | 1.80991100  | -0.52881500 |
| C | 0.55143100  | -0.07282200 | 0.62230000  |
| H | 0.00624900  | -0.36730700 | 1.52686200  |

|   |             |             |             |
|---|-------------|-------------|-------------|
| C | -0.52790000 | 0.29166000  | -0.47458800 |
| H | -0.18768200 | -0.09339000 | -1.44685700 |
| C | 1.45492400  | -1.22715700 | 0.23439200  |
| C | 2.39083500  | -1.10066800 | -0.80498900 |
| C | 1.35393100  | -2.46027600 | 0.89111500  |
| C | 3.19694900  | -2.17616400 | -1.17681100 |
| H | 2.49394000  | -0.14917200 | -1.32111700 |
| C | 2.16072400  | -3.54070900 | 0.52252100  |
| H | 0.63574900  | -2.57668700 | 1.69953800  |
| C | 3.08472100  | -3.40244000 | -0.51381400 |
| H | 3.91592700  | -2.05710500 | -1.98329400 |
| H | 2.06579300  | -4.48780700 | 1.04727200  |
| H | 3.71429200  | -4.23984400 | -0.80232000 |
| C | -1.89339300 | -0.31943000 | -0.20236400 |
| C | -2.67121700 | 0.10593600  | 0.88634700  |
| C | -2.39785300 | -1.33541100 | -1.02382200 |
| C | -3.91416100 | -0.47130900 | 1.14711800  |
| H | -2.29951300 | 0.89934200  | 1.53122200  |
| C | -3.64164900 | -1.91808000 | -0.76547900 |
| H | -1.81049300 | -1.67514000 | -1.87393100 |
| C | -4.40416000 | -1.48778600 | 0.32147500  |
| H | -4.50196400 | -0.12644100 | 1.99389300  |
| H | -4.01316900 | -2.70634900 | -1.41508500 |
| H | -5.37253200 | -1.93746600 | 0.52364200  |
| C | 2.32277300  | 1.43285700  | 1.71484300  |
| H | 2.82815300  | 0.59974100  | 2.19453400  |
| H | 2.71425800  | 2.42814500  | 1.90426100  |
| C | -1.43717700 | 2.60343800  | -1.38180400 |
| H | -1.26601900 | 3.67653100  | -1.25931300 |
| H | -1.31319800 | 2.35060700  | -2.44423500 |
| H | -2.48259400 | 2.38686700  | -1.12864300 |
| O | 0.81293800  | 3.62849200  | 0.37783600  |
| C | 1.80946600  | 4.10739500  | -0.53592700 |
| H | 1.99450000  | 5.15102900  | -0.27254100 |
| H | 2.74059400  | 3.53676800  | -0.44292800 |
| H | 1.45257700  | 4.04931500  | -1.57137100 |

**10**

E(B3LYP/BS1) = -2335.725188 au

H(B3LYP/BS1) = -2335.257182 au

G(B3LYP/BS1) = -2335.357279 au

E(M06-2X/BS2//B3LYP/BS1) = -2335.603068 au

|    |             |             |             |
|----|-------------|-------------|-------------|
| H  | -6.20710700 | 1.00238800  | 0.45988000  |
| O  | -5.85653100 | 0.15997000  | 0.11642800  |
| C  | -4.51663200 | 0.14150800  | 0.20538500  |
| C  | -3.85143700 | -1.02005900 | -0.21698000 |
| C  | -3.75394500 | 1.20489400  | 0.72414000  |
| C  | -2.43805800 | -1.09103400 | -0.16875100 |
| C  | -2.35914800 | 1.12994300  | 0.77705400  |
| C  | -1.66856200 | -0.00026200 | 0.27687700  |
| O  | -0.32511600 | -0.08838900 | 0.37215100  |
| Cl | -4.61721300 | 2.60063900  | 1.31007300  |

|    |             |             |             |
|----|-------------|-------------|-------------|
| Cl | -1.45142100 | 2.40379700  | 1.52646400  |
| C  | -4.62484300 | -2.12598600 | -0.68296800 |
| C  | -1.80181300 | -2.33169200 | -0.48668600 |
| N  | -5.25210900 | -3.02803200 | -1.06482900 |
| N  | -1.33853200 | -3.37804900 | -0.69436400 |
| C  | 0.92134100  | -0.83168300 | -1.61647900 |
| C  | 2.08721400  | -1.44152800 | -1.31896200 |
| C  | 0.62044800  | 0.35858500  | -0.73644600 |
| C  | 2.80135400  | -0.70136700 | -0.19693100 |
| H  | 3.80026900  | -0.41277800 | -0.54885900 |
| C  | 1.95835700  | 0.60581900  | 0.02807200  |
| H  | 1.70138500  | 0.70467600  | 1.08449000  |
| C  | 3.01642000  | -1.52711900 | 1.06862700  |
| C  | 1.97300900  | -2.25550400 | 1.66063600  |
| C  | 4.27853800  | -1.55857700 | 1.67710900  |
| C  | 2.18693800  | -2.98698100 | 2.82981900  |
| H  | 0.98927900  | -2.24613000 | 1.20101400  |
| C  | 4.49609900  | -2.28791300 | 2.84887400  |
| H  | 5.10082000  | -1.00515200 | 1.22853200  |
| C  | 3.44926300  | -3.00558300 | 3.42994600  |
| H  | 1.36614900  | -3.54583700 | 3.27229400  |
| H  | 5.48356500  | -2.29742800 | 3.30315700  |
| H  | 3.61491000  | -3.57681500 | 4.33949200  |
| C  | 2.70443600  | 1.86639200  | -0.38035400 |
| C  | 3.36893000  | 1.97199800  | -1.61339500 |
| C  | 2.74958800  | 2.96227400  | 0.49185400  |
| C  | 4.05205700  | 3.13729800  | -1.96213700 |
| H  | 3.34972500  | 1.13650100  | -2.30904800 |
| C  | 3.43453900  | 4.13082400  | 0.14756700  |
| H  | 2.24762000  | 2.89834200  | 1.45446300  |
| C  | 4.08802900  | 4.22268000  | -1.08195700 |
| H  | 4.55838700  | 3.19705700  | -2.92195100 |
| H  | 3.45895400  | 4.96551600  | 0.84315700  |
| H  | 4.62315900  | 5.12888000  | -1.35226200 |
| C  | 2.77120200  | -2.65682100 | -1.88110000 |
| H  | 3.75397500  | -2.38455000 | -2.29056500 |
| H  | 2.95985600  | -3.38090500 | -1.07824400 |
| H  | 2.21283300  | -3.16826200 | -2.66293200 |
| C  | 0.02690700  | 1.53475300  | -1.49954500 |
| H  | -0.94826100 | 1.27379500  | -1.91776900 |
| H  | -0.07004300 | 2.41823800  | -0.86701300 |
| H  | 0.68396700  | 1.78643600  | -2.33540600 |
| O  | -0.05440600 | -1.05185800 | -2.53764600 |
| C  | 0.07331000  | -2.08825000 | -3.50956800 |
| H  | -0.79079300 | -1.98131600 | -4.16789500 |
| H  | 0.99197700  | -1.96790400 | -4.09326700 |
| H  | 0.04781800  | -3.07502300 | -3.03774200 |

**Table 1**  
**para-CN-Ph (TS\_A)**  
E(B3LYP/BS1) = -2520.140977 au

H(B3LYP/BS1) = -2519.680333 au  
 G(B3LYP/BS1) = -2519.790971 au  
 E(M06-2X/BS2//B3LYP/BS1) = -2519.987686 au

|   |             |             |             |
|---|-------------|-------------|-------------|
| C | 0.98818200  | -2.18337800 | -1.02428200 |
| C | 2.30947700  | -1.71032100 | -0.48455500 |
| C | 0.03087300  | -1.27409900 | -1.67156000 |
| C | 2.88529700  | -0.59122500 | -0.99346500 |
| H | 2.38934300  | -0.10834900 | -1.83216600 |
| C | -0.20347500 | -0.05876300 | -1.05192100 |
| H | 0.47505400  | 0.19730900  | -0.24609600 |
| C | 4.15049600  | 0.03758800  | -0.60090800 |
| C | 4.61263300  | 0.07798700  | 0.73033400  |
| C | 4.91444100  | 0.68288800  | -1.59576600 |
| C | 5.80945100  | 0.70749600  | 1.05024200  |
| H | 4.01189800  | -0.34661500 | 1.52627400  |
| C | 6.11689900  | 1.30406700  | -1.29020600 |
| H | 4.56013900  | 0.68298000  | -2.62253400 |
| C | 6.57490400  | 1.31474700  | 0.03988300  |
| H | 6.15054500  | 0.74027200  | 2.07954500  |
| H | 6.70099000  | 1.78445500  | -2.06795500 |
| C | -1.15135800 | 0.99845100  | -1.36134600 |
| C | -2.33830300 | 0.83078800  | -2.11324700 |
| C | -0.89450400 | 2.27520900  | -0.80461400 |
| C | -3.20422700 | 1.89389100  | -2.32495500 |
| H | -2.60783300 | -0.13822300 | -2.51032800 |
| C | -1.74967300 | 3.34590700  | -1.01888700 |
| H | 0.00297400  | 2.42557500  | -0.21239800 |
| C | -2.91248700 | 3.16009000  | -1.78610200 |
| H | -4.11294900 | 1.74801400  | -2.89856900 |
| H | -1.52835500 | 4.31854600  | -0.59353800 |
| C | 2.93954700  | -2.61736600 | 0.54420700  |
| H | 4.02511900  | -2.50417900 | 0.57263500  |
| H | 2.54834100  | -2.41081100 | 1.54771900  |
| H | 2.70807000  | -3.65981100 | 0.30890600  |
| C | -0.66776800 | -1.73947500 | -2.92205700 |
| H | -0.05164200 | -2.48057000 | -3.43614500 |
| H | -1.64368700 | -2.19793000 | -2.72156500 |
| H | -0.83455500 | -0.89531500 | -3.59647200 |
| O | 1.13682200  | -3.45686100 | -1.55481100 |
| H | 0.28718000  | -2.33585800 | 0.12939400  |
| C | 0.10152300  | -4.43750000 | -1.37358800 |
| H | 0.46017000  | -5.33285800 | -1.88286800 |
| H | -0.03862300 | -4.64766900 | -0.30956200 |
| H | -0.84823000 | -4.12504100 | -1.81349800 |
| O | -0.36891000 | -2.41648400 | 1.19848400  |
| C | -1.22639900 | -1.46186500 | 1.34382700  |
| C | -0.86731500 | -0.27238000 | 2.08278700  |
| C | -2.59982100 | -1.57481100 | 0.88319300  |
| C | -1.77376100 | 0.74734500  | 2.30298300  |
| C | -3.51042800 | -0.57430900 | 1.08908000  |
| C | -3.15799300 | 0.67653400  | 1.79183000  |

|    |             |             |             |
|----|-------------|-------------|-------------|
| O  | -3.95823100 | 1.59388000  | 1.96629100  |
| Cl | -3.03681900 | -3.05342500 | 0.08891600  |
| Cl | -5.15613300 | -0.69948100 | 0.57062000  |
| C  | 0.46482600  | -0.20067600 | 2.60205400  |
| C  | -1.42688600 | 1.90991800  | 3.05063600  |
| N  | 1.54652700  | -0.13991300 | 3.02444100  |
| N  | -1.14419800 | 2.86049800  | 3.65945700  |
| C  | 7.81218600  | 1.95800600  | 0.36699100  |
| N  | 8.81842000  | 2.47985800  | 0.63179600  |
| C  | -3.80612800 | 4.25660000  | -2.01309900 |
| N  | -4.53110200 | 5.14714800  | -2.20105900 |

### para-CN-Ph (TS\_B)

E(B3LYP/BS1) = -2520.129803 au

H(B3LYP/BS1) = -2519.668282 au

G(B3LYP/BS1) = -2519.779326 au

E(M06-2X/BS2//B3LYP/BS1) = -2519.979612 au

|   |             |             |             |
|---|-------------|-------------|-------------|
| C | 0.01917500  | -1.08680700 | -2.05123300 |
| C | 1.36025500  | -0.48643300 | -2.03847400 |
| C | -1.19414500 | -0.17357400 | -2.01335400 |
| C | 1.55212400  | 0.54625500  | -1.15049900 |
| H | 0.65988900  | 0.89927800  | -0.63891500 |
| C | -1.95339800 | 0.00744900  | -0.91822500 |
| H | -1.65083700 | -0.48253700 | 0.00133100  |
| C | 2.73847100  | 1.32621700  | -0.82601500 |
| C | 4.06926900  | 0.96436600  | -1.13639400 |
| C | 2.52581300  | 2.53112800  | -0.11523700 |
| C | 5.13046100  | 1.78591200  | -0.78023500 |
| H | 4.28910400  | 0.02671500  | -1.62474900 |
| C | 3.57790700  | 3.36248600  | 0.23535700  |
| H | 1.51313800  | 2.81748100  | 0.15210300  |
| C | 4.89203900  | 2.99349200  | -0.10198700 |
| H | 6.14688900  | 1.49329100  | -1.02000400 |
| H | 3.39319800  | 4.28779300  | 0.76990300  |
| C | -3.15484300 | 0.85066100  | -0.76853000 |
| C | -4.14916900 | 0.95159900  | -1.75890600 |
| C | -3.34183600 | 1.54482100  | 0.44254200  |
| C | -5.27474200 | 1.74431800  | -1.56348500 |
| H | -4.06125400 | 0.38243700  | -2.67725600 |
| C | -4.45706900 | 2.34643900  | 0.64704500  |
| H | -2.59610000 | 1.46262600  | 1.22765700  |
| C | -5.43097500 | 2.45382300  | -0.36131800 |
| H | -6.03671000 | 1.80905300  | -2.33290400 |
| H | -4.58165500 | 2.88547600  | 1.58015800  |
| C | 2.41991000  | -1.08622200 | -2.92768600 |
| H | 3.06386100  | -0.29978300 | -3.33022000 |
| H | 3.05744200  | -1.79659800 | -2.38759100 |
| H | 1.96243400  | -1.62066300 | -3.76058700 |
| C | -1.40225000 | 0.52258800  | -3.34626700 |
| H | -0.44125800 | 0.85157700  | -3.75441400 |
| H | -1.85755000 | -0.14015400 | -4.09198200 |
| H | -2.04470000 | 1.39804900  | -3.23451300 |



|    |             |             |             |
|----|-------------|-------------|-------------|
| O  | -0.07308200 | -2.14440700 | -2.90011000 |
| H  | 0.12102500  | -1.74580100 | -0.73369900 |
| C  | -1.30873700 | -2.88552000 | -2.95897100 |
| H  | -2.12785200 | -2.26395400 | -3.32696800 |
| H  | -1.11593100 | -3.70158400 | -3.65407400 |
| H  | -1.55775000 | -3.28672400 | -1.97289900 |
| O  | -1.56024700 | -3.47376300 | 0.81581800  |
| C  | -0.73441600 | -2.63578100 | 1.11933800  |
| C  | 0.55717200  | -2.48564300 | 0.31362900  |
| C  | -0.93819800 | -1.67330900 | 2.23352900  |
| C  | 1.64799100  | -1.78034100 | 0.93042700  |
| C  | 0.04365900  | -0.82503800 | 2.62374300  |
| C  | 1.43456900  | -0.85831700 | 2.03102400  |
| O  | 2.32444100  | -0.16331300 | 2.51358300  |
| Cl | -2.49331600 | -1.73645200 | 2.99059400  |
| Cl | -0.18264400 | 0.31606800  | 3.89244400  |
| C  | 0.89838100  | -3.71215300 | -0.39023500 |
| C  | 2.98527600  | -1.99474700 | 0.52090000  |
| N  | 1.17933500  | -4.68311100 | -0.96095000 |
| N  | 4.08724800  | -2.18657400 | 0.18637100  |
| C  | 5.98951600  | 3.84229300  | 0.25574200  |
| C  | -6.58787500 | 3.27434700  | -0.15809900 |
| N  | -7.52690800 | 3.94204100  | 0.00628800  |
| N  | 6.88047300  | 4.53286300  | 0.54470400  |

**para-CN-Ph (TS\_D)**

E(B3LYP/BS1) = -2520.12572 au

H(B3LYP/BS1) = -2519.66698 au

G(B3LYP/BS1) = -2519.783696 au

E(M06-2X/BS2//B3LYP/BS1) = -2519.962837 au

|   |             |             |             |
|---|-------------|-------------|-------------|
| C | -0.45990500 | 0.65861500  | 2.54276100  |
| C | -1.84359100 | 0.53057400  | 2.04528200  |
| C | 0.46517500  | 1.71149100  | 2.01016600  |
| C | -2.26173900 | 1.27437000  | 0.95910600  |
| H | -1.61722700 | 2.09215000  | 0.65004200  |
| C | 0.85473800  | 1.62105200  | 0.70774000  |
| H | 0.47282300  | 0.76799800  | 0.15008200  |
| C | -3.49447700 | 1.17050300  | 0.19790700  |
| C | -4.21437000 | -0.03326400 | 0.01271800  |
| C | -3.96811100 | 2.33809700  | -0.44731100 |
| C | -5.37267500 | -0.05844500 | -0.75036600 |
| H | -3.84286800 | -0.96286700 | 0.42678000  |
| C | -5.13251000 | 2.32574200  | -1.19814600 |
| H | -3.41410300 | 3.26565500  | -0.33809000 |
| C | -5.84717100 | 1.12280700  | -1.35017700 |
| H | -5.90964300 | -0.98974400 | -0.89478600 |
| H | -5.49125700 | 3.23273700  | -1.67248400 |
| C | 1.67964300  | 2.51026200  | -0.10897500 |
| C | 2.58230400  | 3.47188200  | 0.39528600  |
| C | 1.58080900  | 2.36882200  | -1.51202100 |
| C | 3.32787100  | 4.27111700  | -0.46157600 |
| H | 2.73281900  | 3.58235000  | 1.46015700  |

|    |             |             |             |
|----|-------------|-------------|-------------|
| C  | 2.31304400  | 3.16765000  | -2.37692100 |
| H  | 0.90814900  | 1.62174900  | -1.92307000 |
| C  | 3.19240500  | 4.13225700  | -1.85359900 |
| H  | 4.02169200  | 5.00035000  | -0.05717300 |
| H  | 2.21424300  | 3.04926000  | -3.45059800 |
| C  | -2.72982900 | -0.44633000 | 2.77641500  |
| H  | -3.78488000 | -0.23918100 | 2.59255900  |
| H  | -2.51885700 | -1.47566200 | 2.46357300  |
| H  | -2.53953400 | -0.38675200 | 3.84940700  |
| C  | 0.84404600  | 2.81836200  | 2.96580900  |
| H  | 0.17120700  | 2.82520300  | 3.82584800  |
| H  | 1.86622500  | 2.71313400  | 3.34946500  |
| H  | 0.78242800  | 3.79019900  | 2.46546700  |
| O  | -0.38721900 | 0.42856900  | 3.91112800  |
| H  | -0.03704600 | -0.49448500 | 2.00425000  |
| C  | 0.84463100  | -0.07017400 | 4.45131100  |
| H  | 0.70481800  | -0.08891200 | 5.53284100  |
| H  | 1.03362500  | -1.08234900 | 4.08204100  |
| H  | 1.69313100  | 0.57452600  | 4.20472800  |
| O  | 0.05064200  | -1.77519000 | 1.68920300  |
| C  | 0.69398800  | -2.29412800 | 0.69816800  |
| C  | -0.02211100 | -3.14820500 | -0.20893600 |
| C  | 2.10933500  | -2.11094300 | 0.46553500  |
| C  | 0.60684000  | -3.75501000 | -1.29496500 |
| C  | 2.74270100  | -2.70468700 | -0.59992700 |
| C  | 2.02897700  | -3.56121500 | -1.56038900 |
| O  | 2.59423500  | -4.09106200 | -2.53064300 |
| Cl | 2.98318200  | -1.14795100 | 1.61631600  |
| Cl | 4.43475000  | -2.50425200 | -0.88392200 |
| C  | -1.41883900 | -3.32519200 | 0.03210200  |
| C  | -0.11377300 | -4.58064700 | -2.20387600 |
| N  | -2.55827800 | -3.46285900 | 0.22452800  |
| N  | -0.70646500 | -5.25506900 | -2.94497800 |
| C  | -7.04791400 | 1.09762900  | -2.12967900 |
| C  | 3.95665300  | 4.96264800  | -2.73514800 |
| N  | -8.02477000 | 1.07899500  | -2.76235000 |
| N  | 4.57683700  | 5.63889100  | -3.45134400 |

**para-CN-Ph (2\_D)**

E(B3LYP/BS1) = -2520.143046 au

H(B3LYP/BS1) = -2519.677612 au

G(B3LYP/BS1) = -2519.796647 au

E(M06-2X/BS2//B3LYP/BS1) = -2519.97013 au

|   |            |             |             |
|---|------------|-------------|-------------|
| C | 2.29443900 | 1.54846200  | -2.41907300 |
| C | 2.54576200 | 0.22481000  | -1.70626600 |
| C | 2.08625800 | 2.49646700  | -1.23208300 |
| C | 3.76365600 | 0.07193600  | -1.07875900 |
| H | 4.48815300 | 0.86424200  | -1.24564700 |
| C | 0.83617300 | 2.46607500  | -0.63357000 |
| H | 0.12312100 | 1.76559900  | -1.06386000 |
| C | 4.27011700 | -1.03829500 | -0.29905400 |
| C | 3.45495300 | -1.94663000 | 0.42039200  |

|    |             |             |             |
|----|-------------|-------------|-------------|
| C  | 5.67811400  | -1.18353600 | -0.21238600 |
| C  | 4.02284000  | -2.97172500 | 1.16042200  |
| H  | 2.37847900  | -1.83388400 | 0.44745500  |
| C  | 6.25146300  | -2.21533900 | 0.51051900  |
| H  | 6.31694800  | -0.48030600 | -0.73790800 |
| C  | 5.42228500  | -3.12132600 | 1.19992100  |
| H  | 3.38840400  | -3.65309500 | 1.71652500  |
| H  | 7.32927900  | -2.32529200 | 0.55476500  |
| C  | 0.29045500  | 3.21592600  | 0.47054400  |
| C  | 0.94971700  | 4.25371100  | 1.18318500  |
| C  | -1.03740500 | 2.87864000  | 0.85661700  |
| C  | 0.31781900  | 4.90917500  | 2.22484900  |
| H  | 1.95218200  | 4.55877700  | 0.92405900  |
| C  | -1.67126700 | 3.52874100  | 1.90055800  |
| H  | -1.54748900 | 2.07919800  | 0.32761700  |
| C  | -0.99551700 | 4.55154500  | 2.59244900  |
| H  | 0.82984400  | 5.70095400  | 2.76032300  |
| H  | -2.68093600 | 3.25573700  | 2.18670400  |
| C  | 1.45697000  | -0.79887000 | -1.79624100 |
| H  | 1.83173200  | -1.80720500 | -1.61401400 |
| H  | 0.63689200  | -0.61315100 | -1.08909300 |
| H  | 1.01556600  | -0.76693100 | -2.79902600 |
| C  | 3.24728700  | 3.34283200  | -0.80476900 |
| H  | 4.12533300  | 3.13165600  | -1.41550700 |
| H  | 3.00055900  | 4.40322200  | -0.94716700 |
| H  | 3.49948500  | 3.20135200  | 0.25070000  |
| O  | 3.37910200  | 1.88401500  | -3.24693600 |
| H  | 1.36927300  | 1.47433600  | -3.00476300 |
| C  | 3.08705600  | 2.92925000  | -4.17803200 |
| H  | 3.98506300  | 3.05892900  | -4.78423900 |
| H  | 2.24524100  | 2.65060500  | -4.82492400 |
| H  | 2.85336600  | 3.87464500  | -3.67200200 |
| O  | -1.51982100 | -0.04268500 | -0.48696200 |
| C  | -2.45801300 | -0.86077600 | -0.35175300 |
| C  | -2.27575000 | -2.15161800 | 0.28533000  |
| C  | -3.82088600 | -0.57548200 | -0.82486000 |
| C  | -3.32440700 | -3.06614000 | 0.43174200  |
| C  | -4.84704500 | -1.46561800 | -0.68369200 |
| C  | -4.67111900 | -2.78299500 | -0.04225600 |
| O  | -5.60627500 | -3.59280200 | 0.08417000  |
| Cl | -4.04352600 | 0.97413100  | -1.58706500 |
| Cl | -6.45279300 | -1.11871900 | -1.25078600 |
| C  | -0.96714100 | -2.44855200 | 0.76158100  |
| C  | -3.11946900 | -4.32721000 | 1.05986100  |
| N  | 0.10601300  | -2.68635100 | 1.14877000  |
| N  | -2.94338300 | -5.35743500 | 1.57488000  |
| C  | 6.00640700  | -4.18634600 | 1.95796500  |
| N  | 6.48340200  | -5.05178800 | 2.57266700  |
| C  | -1.64174200 | 5.23421500  | 3.67183000  |
| N  | -2.16591600 | 5.79020600  | 4.54960600  |

para-CN-Ph (2\_A)

E(B3LYP/BS1) = -2520.189284 au  
H(B3LYP/BS1) = -2519.722099 au  
G(B3LYP/BS1) = -2519.832321 au  
E(M06-2X/BS2//B3LYP/BS1) = -2520.059354 au

|   |             |             |             |
|---|-------------|-------------|-------------|
| C | -0.49949500 | -0.64812200 | 2.02292800  |
| C | -1.92484000 | -0.76262200 | 1.44469200  |
| C | 0.21617200  | 0.68930400  | 1.79318100  |
| C | -2.50314200 | 0.28270000  | 0.81809000  |
| H | -1.94141600 | 1.20824400  | 0.74882400  |
| C | 0.54650400  | 1.05174200  | 0.53413500  |
| H | 0.24868100  | 0.39256000  | -0.27733700 |
| C | -3.85420700 | 0.37906000  | 0.24180600  |
| C | -4.54732800 | -0.70120500 | -0.33919300 |
| C | -4.47292300 | 1.64662400  | 0.22646700  |
| C | -5.81572500 | -0.53163600 | -0.88246900 |
| H | -4.08277100 | -1.67772000 | -0.39679600 |
| C | -5.74260300 | 1.82856400  | -0.30327600 |
| H | -3.94685900 | 2.49838300  | 0.64824200  |
| C | -6.42691400 | 0.73336500  | -0.86029400 |
| H | -6.33271100 | -1.37314200 | -1.33174200 |
| H | -6.20644200 | 2.80931700  | -0.29423800 |
| C | 1.21426300  | 2.27654200  | 0.06586900  |
| C | 2.19137200  | 2.96810900  | 0.80813100  |
| C | 0.89034400  | 2.75734600  | -1.21945400 |
| C | 2.79543600  | 4.11377100  | 0.30301500  |
| H | 2.50998600  | 2.59124100  | 1.77253100  |
| C | 1.47836400  | 3.90561500  | -1.73115300 |
| H | 0.15754300  | 2.22364500  | -1.81801700 |
| C | 2.43550000  | 4.59630400  | -0.96658200 |
| H | 3.55158600  | 4.63173900  | 0.88350900  |
| H | 1.20766600  | 4.26897800  | -2.71690300 |
| C | -2.62993900 | -2.06258700 | 1.76115000  |
| H | -3.70509100 | -1.90441500 | 1.88147900  |
| H | -2.48583700 | -2.80885600 | 0.97419500  |
| H | -2.23899700 | -2.48502200 | 2.68763800  |
| C | 0.37272400  | 1.58542000  | 2.99920600  |
| H | -0.44286000 | 1.41216800  | 3.70523700  |
| H | 1.31135100  | 1.40322700  | 3.53614100  |
| H | 0.36169900  | 2.63735000  | 2.70347100  |
| O | -0.66570800 | -0.96483400 | 3.36646600  |
| H | 3.82877400  | -2.63617100 | -3.30653500 |
| C | 0.43068000  | -1.41281600 | 4.17418100  |
| H | 0.87980800  | -2.31424900 | 3.75196500  |
| H | 1.19757900  | -0.64663100 | 4.30039900  |
| H | -0.01547600 | -1.64391600 | 5.14313100  |
| O | 4.17345100  | -2.23066000 | -2.48963600 |
| C | 3.20071700  | -2.13293900 | -1.57004100 |
| C | 3.53206600  | -1.57768000 | -0.32605000 |
| C | 1.87724400  | -2.56068900 | -1.78101100 |
| C | 2.55047200  | -1.44518800 | 0.68753500  |
| C | 0.90632400  | -2.42055400 | -0.78485800 |

|    |             |             |             |
|----|-------------|-------------|-------------|
| C  | 1.21614700  | -1.84830100 | 0.47481900  |
| O  | 0.28369100  | -1.83551100 | 1.45093000  |
| Cl | 1.50333900  | -3.27161300 | -3.32661600 |
| Cl | -0.70512300 | -2.97648100 | -1.08798400 |
| C  | 4.87743500  | -1.15592800 | -0.10003800 |
| C  | 2.96597900  | -0.89431800 | 1.93821700  |
| N  | 5.97314200  | -0.81215300 | 0.08435200  |
| N  | 3.36938300  | -0.44255400 | 2.93133000  |
| C  | 3.05186000  | 5.77973600  | -1.48718100 |
| C  | -7.73523700 | 0.90955100  | -1.41527600 |
| N  | -8.79913700 | 1.05297000  | -1.86580700 |
| N  | 3.55077600  | 6.74229600  | -1.91106800 |

**para-Cl-Ph (TS\_A)**

E(B3LYP/BS1) = -3254.842071 au

H(B3LYP/BS1) = -3254.399068 au

G(B3LYP/BS1) = -3254.507295 au

E(M06-2X/BS2//B3LYP/BS1) = -3254.70702 au

|   |             |             |             |
|---|-------------|-------------|-------------|
| C | 0.92200900  | -2.22220900 | -1.08021800 |
| C | 2.25014900  | -1.76981100 | -0.54198100 |
| C | -0.04209000 | -1.28934200 | -1.68092100 |
| C | 2.82095700  | -0.63180500 | -1.01524300 |
| H | 2.31115200  | -0.12055800 | -1.82877700 |
| C | -0.26731300 | -0.09319900 | -1.01760000 |
| H | 0.42363800  | 0.13338200  | -0.21350300 |
| C | 4.08821500  | -0.01184000 | -0.61939100 |
| C | 4.59515100  | -0.04507900 | 0.69512600  |
| C | 4.81543900  | 0.70558100  | -1.59112100 |
| C | 5.79521300  | 0.58334000  | 1.01934900  |
| H | 4.02936600  | -0.52670600 | 1.48437300  |
| C | 6.02129900  | 1.32729000  | -1.28474400 |
| H | 4.43247400  | 0.76650600  | -2.60617700 |
| C | 6.50364600  | 1.25448200  | 0.02299100  |
| H | 6.16999700  | 0.56017600  | 2.03683900  |
| H | 6.57600500  | 1.86532600  | -2.04567200 |
| C | -1.21996000 | 0.97049400  | -1.26855600 |
| C | -2.41369700 | 0.84002200  | -2.01833400 |
| C | -0.96626100 | 2.22120700  | -0.65300400 |
| C | -3.28778900 | 1.90919600  | -2.16822900 |
| H | -2.68546700 | -0.10761600 | -2.46327600 |
| C | -1.82802900 | 3.29981000  | -0.80479500 |
| H | -0.06374600 | 2.34923800  | -0.06277800 |
| C | -2.98597500 | 3.13426900  | -1.56662800 |
| H | -4.20235500 | 1.79238000  | -2.73871700 |
| H | -1.60964700 | 4.25219100  | -0.33499600 |
| C | 2.89286200  | -2.71333900 | 0.44574900  |
| H | 3.98096500  | -2.61876000 | 0.44387200  |
| H | 2.53677300  | -2.52584600 | 1.46612100  |
| H | 2.63706500  | -3.74593100 | 0.19241400  |
| C | -0.76222900 | -1.71069700 | -2.93490300 |
| H | -0.15809300 | -2.43835500 | -3.48138500 |
| H | -1.73773300 | -2.17074900 | -2.73477900 |

|    |             |             |             |
|----|-------------|-------------|-------------|
| H  | -0.93458300 | -0.84472200 | -3.57976400 |
| O  | 1.06619800  | -3.47321000 | -1.67284800 |
| H  | 0.24442600  | -2.42896500 | 0.06227700  |
| C  | 0.04389900  | -4.46694300 | -1.49905200 |
| H  | 0.39331900  | -5.34104700 | -2.05049400 |
| H  | -0.06772800 | -4.71794900 | -0.44032300 |
| H  | -0.92035700 | -4.14635800 | -1.90095600 |
| O  | -0.41375600 | -2.56088200 | 1.14565900  |
| C  | -1.26379500 | -1.60616200 | 1.32692200  |
| C  | -0.89515500 | -0.44174400 | 2.09762600  |
| C  | -2.63762100 | -1.68945700 | 0.86213800  |
| C  | -1.78837900 | 0.58838300  | 2.33301000  |
| C  | -3.53501600 | -0.68038200 | 1.08537200  |
| C  | -3.16775000 | 0.55257400  | 1.80982400  |
| O  | -3.95431200 | 1.48184900  | 1.99199700  |
| Cl | -3.09345700 | -3.14452300 | 0.03326800  |
| Cl | -5.18229200 | -0.77399300 | 0.55997200  |
| C  | 0.43357700  | -0.40101700 | 2.62848500  |
| C  | -1.42842800 | 1.72801200  | 3.10908000  |
| N  | 1.51158700  | -0.36469100 | 3.06336000  |
| N  | -1.13499400 | 2.65991100  | 3.74157200  |
| Cl | 8.02512100  | 2.04227100  | 0.42649100  |
| Cl | -4.08667900 | 4.48306800  | -1.76696700 |

#### para-Cl-Ph (TS\_B)

E(B3LYP/BS1) = -3254.83045 au

H(B3LYP/BS1) = -3254.386642 au

G(B3LYP/BS1) = -3254.495313 au

E(M06-2X/BS2//B3LYP/BS1) = -3254.698039 au

|   |             |             |             |
|---|-------------|-------------|-------------|
| C | 0.02477800  | -1.17251300 | -2.04602500 |
| C | 1.36684100  | -0.57945700 | -2.03562600 |
| C | -1.18349800 | -0.25247900 | -2.00578100 |
| C | 1.56443900  | 0.45959000  | -1.15269600 |
| H | 0.67164800  | 0.81539200  | -0.64374300 |
| C | -1.94057700 | -0.06617400 | -0.90981300 |
| H | -1.63644500 | -0.55877900 | 0.00816800  |
| C | 2.74868400  | 1.23511400  | -0.82753900 |
| C | 4.07951300  | 0.89145300  | -1.16048100 |
| C | 2.54227000  | 2.42543100  | -0.09021100 |
| C | 5.14237400  | 1.71246300  | -0.80074300 |
| H | 4.30205600  | -0.03285800 | -1.67298700 |
| C | 3.59472300  | 3.25789000  | 0.26549700  |
| H | 1.53220200  | 2.70337600  | 0.19651500  |
| C | 4.89204200  | 2.89337800  | -0.09959600 |
| H | 6.15862900  | 1.43460700  | -1.05724900 |
| H | 3.41537400  | 4.17144700  | 0.82120500  |
| C | -3.13923300 | 0.78026500  | -0.75558700 |
| C | -4.13080700 | 0.90078100  | -1.74509600 |
| C | -3.33136400 | 1.46192500  | 0.46050000  |
| C | -5.25748700 | 1.69732400  | -1.54470200 |
| H | -4.04601000 | 0.34396600  | -2.67171300 |
| C | -4.44621200 | 2.26849200  | 0.67262600  |

|    |             |             |             |
|----|-------------|-------------|-------------|
| H  | -2.59100300 | 1.36972800  | 1.25018700  |
| C  | -5.39970800 | 2.38156900  | -0.33909000 |
| H  | -6.01840500 | 1.77585700  | -2.31359000 |
| H  | -4.57482300 | 2.79736400  | 1.61073900  |
| C  | 2.42807700  | -1.18616100 | -2.91841000 |
| H  | 3.05172900  | -0.39860600 | -3.35098600 |
| H  | 3.08700100  | -1.86592000 | -2.36471500 |
| H  | 1.97328600  | -1.75322100 | -3.73070400 |
| C  | -1.39378300 | 0.44342700  | -3.33873400 |
| H  | -0.43176400 | 0.75174400  | -3.76055200 |
| H  | -1.87354400 | -0.20986100 | -4.07768000 |
| H  | -2.01709900 | 1.33206000  | -3.21981400 |
| O  | -0.07664800 | -2.22638600 | -2.90501900 |
| H  | 0.11667400  | -1.83582400 | -0.74699500 |
| C  | -1.31530700 | -2.96020200 | -2.95506100 |
| H  | -2.13471200 | -2.33479200 | -3.31649300 |
| H  | -1.13299800 | -3.77731900 | -3.65214500 |
| H  | -1.56115000 | -3.36174900 | -1.96807200 |
| O  | -1.56878300 | -3.56230300 | 0.81443500  |
| C  | -0.73641700 | -2.72829500 | 1.11379200  |
| C  | 0.55336000  | -2.58709500 | 0.30918700  |
| C  | -0.93301500 | -1.76215300 | 2.22649600  |
| C  | 1.64874700  | -1.88357900 | 0.91945700  |
| C  | 0.05357300  | -0.91767200 | 2.61258900  |
| C  | 1.44240700  | -0.95654100 | 2.01560400  |
| O  | 2.33528100  | -0.26044700 | 2.49274900  |
| Cl | -2.48686700 | -1.81677800 | 2.98815000  |
| Cl | -0.16503300 | 0.22691600  | 3.88070600  |
| C  | 0.88654700  | -3.81250800 | -0.39834600 |
| C  | 2.98371100  | -2.10063000 | 0.50401500  |
| N  | 1.16195700  | -4.78367800 | -0.97170900 |
| N  | 4.08430100  | -2.29488200 | 0.16598700  |
| Cl | 6.23493100  | 3.93246600  | 0.34288900  |
| Cl | -6.81840300 | 3.39354400  | -0.08080400 |

**para-Cl-Ph (TS\_D)**

E(B3LYP/BS1) = -3254.826306 au

H(B3LYP/BS1) = -3254.385196 au

G(B3LYP/BS1) = -3254.498903 au

E(M06-2X/BS2//B3LYP/BS1) = -3254.682472 au

|   |             |             |             |
|---|-------------|-------------|-------------|
| C | -0.42778100 | 0.42889900  | 2.64495500  |
| C | -1.80917200 | 0.33690600  | 2.13907100  |
| C | 0.51863800  | 1.47986400  | 2.15836600  |
| C | -2.22992700 | 1.15576700  | 1.10955800  |
| H | -1.58089400 | 1.98995700  | 0.85837100  |
| C | 0.87761400  | 1.46294400  | 0.84274800  |
| H | 0.45049800  | 0.66186100  | 0.24203500  |
| C | -3.46250000 | 1.11403400  | 0.34413400  |
| C | -4.21199800 | -0.05973800 | 0.09683200  |
| C | -3.91392000 | 2.31960300  | -0.24387900 |
| C | -5.37148300 | -0.02310900 | -0.66909400 |
| H | -3.86571400 | -1.01859500 | 0.46328100  |

|    |             |             |             |
|----|-------------|-------------|-------------|
| C  | -5.07848500 | 2.37141700  | -0.99812400 |
| H  | -3.34272300 | 3.23082700  | -0.09025800 |
| C  | -5.80344900 | 1.19439100  | -1.20051000 |
| H  | -5.93018100 | -0.93236300 | -0.86201500 |
| H  | -5.41854500 | 3.30649700  | -1.42936900 |
| C  | 1.71850400  | 2.36786300  | 0.06190600  |
| C  | 2.65180900  | 3.28291500  | 0.59506600  |
| C  | 1.60471400  | 2.29795700  | -1.34472400 |
| C  | 3.41371600  | 4.10187900  | -0.23375900 |
| H  | 2.81772200  | 3.34518200  | 1.66183100  |
| C  | 2.35162500  | 3.11630500  | -2.18371000 |
| H  | 0.90777700  | 1.59079600  | -1.78593400 |
| C  | 3.25192400  | 4.01913000  | -1.61667400 |
| H  | 4.13215200  | 4.79371100  | 0.19229600  |
| H  | 2.24134200  | 3.05212500  | -3.26066100 |
| C  | -2.69906900 | -0.68984600 | 2.79729200  |
| H  | -3.75310300 | -0.43573500 | 2.67213600  |
| H  | -2.53282600 | -1.68654200 | 2.37197200  |
| H  | -2.47426300 | -0.74780200 | 3.86340500  |
| C  | 0.96771700  | 2.50883200  | 3.16974000  |
| H  | 0.32905600  | 2.47650000  | 4.05483000  |
| H  | 2.00101300  | 2.35204500  | 3.50306900  |
| H  | 0.91482500  | 3.51367700  | 2.73769700  |
| O  | -0.35987600 | 0.13772900  | 4.00510800  |
| H  | -0.00908700 | -0.72963200 | 2.04010800  |
| C  | 0.85146200  | -0.43343500 | 4.51569900  |
| H  | 0.71511400  | -0.49635600 | 5.59637500  |
| H  | 1.00304900  | -1.43471000 | 4.10169600  |
| H  | 1.72477100  | 0.18810800  | 4.29626000  |
| O  | 0.07602600  | -1.95478100 | 1.66016400  |
| C  | 0.72130300  | -2.39654500 | 0.63094700  |
| C  | 0.00271500  | -3.16240300 | -0.34880100 |
| C  | 2.14019400  | -2.21194600 | 0.42630900  |
| C  | 0.63349600  | -3.68420000 | -1.47716300 |
| C  | 2.77565300  | -2.72202200 | -0.68080400 |
| C  | 2.05985000  | -3.48538700 | -1.71526500 |
| O  | 2.62679800  | -3.93844100 | -2.72273800 |
| Cl | 3.01538200  | -1.36166400 | 1.66113500  |
| Cl | 4.47211500  | -2.51922700 | -0.93447400 |
| C  | -1.39725600 | -3.34683400 | -0.13299500 |
| C  | -0.08875500 | -4.42331500 | -2.45651500 |
| N  | -2.53890300 | -3.49407500 | 0.03759100  |
| N  | -0.68235200 | -5.02728800 | -3.25540400 |
| Cl | 4.20915100  | 5.05912800  | -2.66300400 |
| Cl | -7.27356800 | 1.24260800  | -2.15932500 |

**para-Cl-Ph (2\_D)**

E(B3LYP/BS1) = -3254.848811 au

H(B3LYP/BS1) = -3254.400778 au

G(B3LYP/BS1) = -3254.518035 au

E(M06-2X/BS2//B3LYP/BS1) = -3254.694232 au

|   |             |            |            |
|---|-------------|------------|------------|
| C | -2.16072500 | 1.66815400 | 2.50161700 |
|---|-------------|------------|------------|



|    |             |             |             |
|----|-------------|-------------|-------------|
| C  | -2.49847400 | 0.36891700  | 1.78228500  |
| C  | -1.87512900 | 2.60632900  | 1.32327000  |
| C  | -3.73540500 | 0.27940400  | 1.18403700  |
| H  | -4.42001200 | 1.09900900  | 1.38551000  |
| C  | -0.61628200 | 2.51808100  | 0.75599700  |
| H  | 0.05516100  | 1.79221600  | 1.21069500  |
| C  | -4.30690300 | -0.78838100 | 0.39329800  |
| C  | -3.55262900 | -1.72491200 | -0.35687600 |
| C  | -5.72132200 | -0.86560400 | 0.32276000  |
| C  | -4.18155700 | -2.70672100 | -1.10914800 |
| H  | -2.47201400 | -1.66697300 | -0.40110300 |
| C  | -6.35825300 | -1.85360300 | -0.41131500 |
| H  | -6.31940300 | -0.14326100 | 0.87065900  |
| C  | -5.57901100 | -2.77408500 | -1.12136700 |
| H  | -3.59429800 | -3.40848200 | -1.69075700 |
| H  | -7.44040700 | -1.91167900 | -0.44349900 |
| C  | -0.01268800 | 3.22772100  | -0.34242000 |
| C  | -0.60999300 | 4.27853500  | -1.09010900 |
| C  | 1.31091000  | 2.83719700  | -0.69235000 |
| C  | 0.07298500  | 4.89609100  | -2.12451400 |
| H  | -1.60761700 | 4.62510000  | -0.86504900 |
| C  | 1.99803000  | 3.44778900  | -1.72783200 |
| H  | 1.77810000  | 2.02461800  | -0.14360700 |
| C  | 1.37325200  | 4.47813000  | -2.43933700 |
| H  | -0.39124700 | 5.69809200  | -2.68725800 |
| H  | 3.00325000  | 3.13494700  | -1.98698900 |
| C  | -1.45565400 | -0.70763400 | 1.82784300  |
| H  | -1.88726800 | -1.69464200 | 1.65343700  |
| H  | -0.65167100 | -0.55895500 | 1.09550700  |
| H  | -0.97977900 | -0.70802400 | 2.81529500  |
| C  | -2.98786900 | 3.50116700  | 0.86113400  |
| H  | -3.88467300 | 3.34340600  | 1.46088200  |
| H  | -2.69514600 | 4.55193200  | 0.98390000  |
| H  | -3.23304100 | 3.34792700  | -0.19468000 |
| O  | -3.22591300 | 2.07829200  | 3.32452000  |
| H  | -1.24892100 | 1.52794800  | 3.09649100  |
| C  | -2.87443400 | 3.12251700  | 4.23353500  |
| H  | -3.76185100 | 3.31526700  | 4.83897200  |
| H  | -2.04759500 | 2.81131100  | 4.88556600  |
| H  | -2.58870300 | 4.04377900  | 3.70948700  |
| O  | 1.63171200  | -0.14360800 | 0.59809700  |
| C  | 2.49359500  | -1.03164800 | 0.41442200  |
| C  | 2.20405500  | -2.25848200 | -0.30540800 |
| C  | 3.87239000  | -0.90143100 | 0.91155700  |
| C  | 3.16947600  | -3.25118600 | -0.50712600 |
| C  | 4.81655300  | -1.86849900 | 0.71656900  |
| C  | 4.53126100  | -3.12018600 | -0.01110500 |
| O  | 5.39302400  | -3.99927000 | -0.18769500 |
| Cl | 4.22489800  | 0.56980600  | 1.77376600  |
| Cl | 6.44150200  | -1.70479700 | 1.31224100  |
| C  | 0.87904200  | -2.40847400 | -0.80444900 |

|    |             |             |             |
|----|-------------|-------------|-------------|
| C  | 2.86013400  | -4.44654100 | -1.21590500 |
| N  | -0.20659700 | -2.52850600 | -1.21095600 |
| N  | 2.59891400  | -5.42221000 | -1.79691900 |
| Cl | -6.36922100 | -4.01936100 | -2.06132300 |
| Cl | 2.22742000  | 5.26095800  | -3.74421900 |

**para-Cl-Ph (2\_A)**

E(B3LYP/BS1) = -3254.88726 au

H(B3LYP/BS1) = -3254.43784 au

G(B3LYP/BS1) = -3254.546215 au

E(M06-2X/BS2//B3LYP/BS1) = -3254.775035 au

|   |             |             |             |
|---|-------------|-------------|-------------|
| C | -0.44614700 | -0.79059400 | 2.04381200  |
| C | -1.87318500 | -0.85761700 | 1.46993000  |
| C | 0.30049300  | 0.53386900  | 1.85586700  |
| C | -2.43460800 | 0.21885200  | 0.88179700  |
| H | -1.85139500 | 1.13281300  | 0.83952400  |
| C | 0.62607500  | 0.93523600  | 0.60735000  |
| H | 0.30365600  | 0.31024200  | -0.22192400 |
| C | -3.78568200 | 0.36559100  | 0.31408500  |
| C | -4.51899900 | -0.67881300 | -0.27992800 |
| C | -4.36658400 | 1.64946900  | 0.32126200  |
| C | -5.78754500 | -0.46038900 | -0.81604000 |
| H | -4.09061400 | -1.67066100 | -0.35756200 |
| C | -5.63597000 | 1.88313000  | -0.19980100 |
| H | -3.81453000 | 2.48018600  | 0.75286700  |
| C | -6.33884800 | 0.81817200  | -0.76266000 |
| H | -6.33594400 | -1.27502200 | -1.27686000 |
| H | -6.07026600 | 2.87677700  | -0.17443700 |
| C | 1.31986500  | 2.15778500  | 0.17063200  |
| C | 2.30864900  | 2.81513700  | 0.92630200  |
| C | 1.00990700  | 2.67800100  | -1.10133300 |
| C | 2.93903400  | 3.96292900  | 0.44809200  |
| H | 2.62150200  | 2.41340200  | 1.88282800  |
| C | 1.62220000  | 3.82909700  | -1.58840600 |
| H | 0.26774000  | 2.17599400  | -1.71639600 |
| C | 2.58223600  | 4.46558600  | -0.80182800 |
| H | 3.70531000  | 4.45397400  | 1.03816200  |
| H | 1.36258400  | 4.22266500  | -2.56523400 |
| C | -2.60522800 | -2.15306900 | 1.74424800  |
| H | -3.67134200 | -1.96984200 | 1.90666800  |
| H | -2.51044800 | -2.86288100 | 0.91697800  |
| H | -2.19968800 | -2.63363900 | 2.63540700  |
| C | 0.49566700  | 1.38255300  | 3.09098400  |
| H | -0.30566900 | 1.19406900  | 3.80940700  |
| H | 1.44469400  | 1.17347000  | 3.59938000  |
| H | 0.48963400  | 2.44458000  | 2.83212900  |
| O | -0.60750600 | -1.15675200 | 3.37544400  |
| H | 3.79151300  | -2.66093900 | -3.40197700 |
| C | 0.48936500  | -1.64531000 | 4.15753200  |
| H | 0.92225300  | -2.53849300 | 3.70198900  |
| H | 1.26841900  | -0.89458900 | 4.30121100  |
| H | 0.04942900  | -1.90196500 | 5.12306500  |

|    |             |             |             |
|----|-------------|-------------|-------------|
| O  | 4.15273200  | -2.29190000 | -2.57510000 |
| C  | 3.19217600  | -2.21416600 | -1.64003800 |
| C  | 3.54570600  | -1.70916000 | -0.38107000 |
| C  | 1.86064200  | -2.61651700 | -1.84953600 |
| C  | 2.57798200  | -1.59989000 | 0.64882200  |
| C  | 0.90361400  | -2.49913300 | -0.83736700 |
| C  | 1.23499500  | -1.97661900 | 0.43905300  |
| O  | 0.31465000  | -1.98173100 | 1.42339800  |
| Cl | 1.45887800  | -3.26663900 | -3.41547800 |
| Cl | -0.71882900 | -3.02305800 | -1.14012800 |
| C  | 4.89956700  | -1.31468700 | -0.15660400 |
| C  | 3.01769600  | -1.10475500 | 1.91447200  |
| N  | 6.00241900  | -0.99348800 | 0.02623000  |
| N  | 3.44413100  | -0.70244300 | 2.91923200  |
| Cl | -7.94529900 | 1.09856700  | -1.43371700 |
| Cl | 3.37112400  | 5.92032400  | -1.40780300 |

**Ph (TS\_A)**

E(B3LYP/BS1) = -2335.651003 au

H(B3LYP/BS1) = -2335.191202 au

G(B3LYP/BS1) = -2335.292982 au

E(M06-2X/BS2//B3LYP/BS1) = -2335.502807 au

|   |             |             |             |
|---|-------------|-------------|-------------|
| C | 1.27543000  | -2.04497800 | -0.41603400 |
| C | 2.55201700  | -1.41259100 | 0.06244000  |
| C | 0.36538200  | -1.36746000 | -1.34819000 |
| C | 3.16929600  | -0.47429900 | -0.70135100 |
| H | 2.73163800  | -0.26506700 | -1.67515400 |
| C | 0.08979000  | -0.02856800 | -1.10903800 |
| H | 0.71945700  | 0.45072900  | -0.36759400 |
| C | 4.40031500  | 0.27199000  | -0.42519500 |
| C | 4.79641000  | 0.67052900  | 0.86795400  |
| C | 5.20348300  | 0.66200000  | -1.51747600 |
| C | 5.96691400  | 1.40335800  | 1.05812100  |
| H | 4.16532000  | 0.44502800  | 1.72037300  |
| C | 6.37839100  | 1.38288000  | -1.32381300 |
| H | 4.89963100  | 0.38420800  | -2.52372400 |
| C | 6.76714000  | 1.75337600  | -0.03261200 |
| H | 6.24973700  | 1.71033700  | 2.06118000  |
| H | 6.98747500  | 1.66313400  | -2.17865500 |
| H | 7.67978600  | 2.32246400  | 0.12041000  |
| C | -0.84474400 | 0.88156900  | -1.74011400 |
| C | -1.98757800 | 0.49300500  | -2.48154200 |
| C | -0.63507100 | 2.26797500  | -1.52705600 |
| C | -2.85577200 | 1.44842800  | -2.99804700 |
| H | -2.21808200 | -0.55419400 | -2.62484400 |
| C | -1.49990300 | 3.21885300  | -2.05605600 |
| H | 0.23060300  | 2.58833000  | -0.95404200 |
| C | -2.61610100 | 2.81181000  | -2.79247100 |
| H | -3.73198500 | 1.12921300  | -3.55418700 |
| H | -1.31160900 | 4.27446700  | -1.88601200 |
| H | -3.30050000 | 3.55106200  | -3.19795900 |
| C | 3.09765000  | -1.97571800 | 1.35270900  |

|    |             |             |             |
|----|-------------|-------------|-------------|
| H  | 4.18219700  | -1.86237300 | 1.41500400  |
| H  | 2.65367800  | -1.47913500 | 2.22431400  |
| H  | 2.85826300  | -3.04064600 | 1.42365200  |
| C  | -0.25733100 | -2.17317700 | -2.45769100 |
| H  | 0.39588000  | -3.00932600 | -2.71797800 |
| H  | -1.23663400 | -2.58755100 | -2.18731300 |
| H  | -0.39964000 | -1.54913300 | -3.34380700 |
| O  | 1.47342200  | -3.41415300 | -0.58185400 |
| H  | 0.49964300  | -1.91231800 | 0.67146000  |
| C  | 0.44101300  | -4.33631800 | -0.20023300 |
| H  | 0.85399600  | -5.32809400 | -0.39092600 |
| H  | 0.20796700  | -4.23080600 | 0.86319600  |
| H  | -0.47134700 | -4.20517700 | -0.78751400 |
| O  | -0.26642900 | -1.72268100 | 1.67925100  |
| C  | -1.13686400 | -0.79386200 | 1.46189400  |
| C  | -0.85718200 | 0.57077200  | 1.84244900  |
| C  | -2.45693300 | -1.07540900 | 0.92490900  |
| C  | -1.77219900 | 1.58800400  | 1.63472200  |
| C  | -3.37465800 | -0.08222700 | 0.71239600  |
| C  | -3.08761700 | 1.33331300  | 1.01786200  |
| O  | -3.89156900 | 2.24128300  | 0.80435300  |
| Cl | -2.82663300 | -2.73860700 | 0.59064200  |
| Cl | -4.96144200 | -0.40498000 | 0.09707000  |
| C  | 0.40641600  | 0.83374600  | 2.46126000  |
| C  | -1.49975700 | 2.93053600  | 2.02726100  |
| N  | 1.43044600  | 1.05323700  | 2.96701000  |
| N  | -1.27890500 | 4.02747800  | 2.34765600  |

### Ph (TS\_B)

E(B3LYP/BS1) = -2335.639038 au

H(B3LYP/BS1) = -2335.178289 au

G(B3LYP/BS1) = -2335.280737 au

E(M06-2X/BS2//B3LYP/BS1) = -2335.49227 au

|   |             |             |             |
|---|-------------|-------------|-------------|
| C | 0.09830200  | -1.32048200 | 1.69634500  |
| C | 1.42872700  | -1.58915500 | 1.13760100  |
| C | -1.12560000 | -1.81877300 | 0.94700800  |
| C | 1.56437900  | -1.40702300 | -0.22151100 |
| H | 0.63989800  | -1.20111300 | -0.75630200 |
| C | -1.93579900 | -1.01686100 | 0.23316800  |
| H | -1.66256300 | 0.03040000  | 0.14878600  |
| C | 2.71532200  | -1.52064900 | -1.10075500 |
| C | 4.06842900  | -1.55079100 | -0.68856400 |
| C | 2.44355800  | -1.58247600 | -2.48918000 |
| C | 5.08990700  | -1.66731800 | -1.62668500 |
| H | 4.32861900  | -1.44774500 | 0.35510700  |
| C | 3.46679700  | -1.71019500 | -3.42056300 |
| H | 1.41130300  | -1.54008200 | -2.82614900 |
| C | 4.79650400  | -1.75688000 | -2.99071700 |
| H | 6.12278300  | -1.68213200 | -1.29153100 |
| H | 3.23141500  | -1.76616400 | -4.47916700 |
| H | 5.60031900  | -1.85174900 | -3.71508500 |
| C | -3.15407900 | -1.37435100 | -0.51988500 |

|    |             |             |             |
|----|-------------|-------------|-------------|
| C  | -4.10720600 | -2.29494200 | -0.04790100 |
| C  | -3.40183500 | -0.72735800 | -1.74543900 |
| C  | -5.25222900 | -2.57995400 | -0.79280100 |
| H  | -3.97116400 | -2.76563700 | 0.92016900  |
| C  | -4.54092500 | -1.01947600 | -2.49290300 |
| H  | -2.68665000 | 0.00187500  | -2.11721800 |
| C  | -5.46986600 | -1.95066900 | -2.02022800 |
| H  | -5.97941800 | -3.28909500 | -0.40711100 |
| H  | -4.70654400 | -0.51619800 | -3.44141200 |
| H  | -6.36188800 | -2.17451300 | -2.59849700 |
| C  | 2.54142500  | -1.97179400 | 2.08040300  |
| H  | 3.18488300  | -2.72409100 | 1.61578400  |
| H  | 3.17194300  | -1.11436500 | 2.34543800  |
| H  | 2.13589700  | -2.38357400 | 3.00493500  |
| C  | -1.28316700 | -3.32326800 | 1.07715800  |
| H  | -0.30902800 | -3.81478800 | 0.98506500  |
| H  | -1.69977500 | -3.61665600 | 2.04839800  |
| H  | -1.94110600 | -3.71305500 | 0.29784500  |
| O  | 0.05662100  | -1.48306800 | 3.05073300  |
| H  | 0.13241400  | 0.12559000  | 1.55762500  |
| C  | -1.16935100 | -1.18309800 | 3.74430800  |
| H  | -1.97115500 | -1.86331800 | 3.44825700  |
| H  | -0.93769700 | -1.31589600 | 4.80060600  |
| H  | -1.47245300 | -0.14904000 | 3.55818800  |
| O  | -1.61970200 | 2.30619400  | 2.22267300  |
| C  | -0.80162700 | 2.14587700  | 1.33741000  |
| C  | 0.52301500  | 1.44191500  | 1.61479500  |
| C  | -1.04830200 | 2.56497000  | -0.06750000 |
| C  | 1.58858400  | 1.62100600  | 0.66690600  |
| C  | -0.07955400 | 2.48286600  | -1.01092400 |
| C  | 1.33478400  | 2.05089700  | -0.69424000 |
| O  | 2.20628400  | 2.12249400  | -1.55755800 |
| Cl | -2.63663400 | 3.17540000  | -0.38882200 |
| Cl | -0.35554800 | 2.94075600  | -2.64843000 |
| C  | 0.89004500  | 1.51231900  | 3.01932500  |
| C  | 2.94036900  | 1.43030900  | 1.03870600  |
| N  | 1.19377900  | 1.55957700  | 4.13889800  |
| N  | 4.05447800  | 1.28669000  | 1.35720600  |

### Ph (TS\_D)

E(B3LYP/BS1) = -2335.634589 au

H(B3LYP/BS1) = -2335.176494 au

G(B3LYP/BS1) = -2335.283183 au

E(M06-2X/BS2//B3LYP/BS1) = -2335.477062 au

|   |             |             |             |
|---|-------------|-------------|-------------|
| C | -1.32106500 | 0.98452200  | 1.94911800  |
| C | -2.38661800 | 0.09213500  | 1.46282800  |
| C | -0.91253200 | 2.20746100  | 1.19106400  |
| C | -2.94523300 | 0.29060300  | 0.21460100  |
| H | -2.71734600 | 1.23596000  | -0.26990600 |
| C | -0.35515200 | 2.04761500  | -0.04254300 |
| H | -0.23098800 | 1.01959100  | -0.37945900 |
| C | -3.86121500 | -0.55029100 | -0.53518300 |

|    |             |             |             |
|----|-------------|-------------|-------------|
| C  | -3.93872300 | -1.95816800 | -0.41498400 |
| C  | -4.69302300 | 0.08006800  | -1.49234600 |
| C  | -4.83151600 | -2.68788500 | -1.19399800 |
| H  | -3.26845000 | -2.48540500 | 0.25356900  |
| C  | -5.59360800 | -0.65149200 | -2.25732000 |
| H  | -4.62957300 | 1.15808000  | -1.61594600 |
| C  | -5.66987700 | -2.04066000 | -2.10808600 |
| H  | -4.86751100 | -3.76902000 | -1.09560800 |
| H  | -6.23117000 | -0.14392200 | -2.97539500 |
| H  | -6.36701200 | -2.61634700 | -2.71012000 |
| C  | 0.07745700  | 3.02614200  | -1.04030300 |
| C  | 0.36141800  | 4.38475800  | -0.78066900 |
| C  | 0.24865700  | 2.56082900  | -2.36388100 |
| C  | 0.77368600  | 5.23490300  | -1.80502800 |
| H  | 0.29355900  | 4.77770200  | 0.22497400  |
| C  | 0.65013100  | 3.41424600  | -3.38655300 |
| H  | 0.05227900  | 1.51450200  | -2.58390000 |
| C  | 0.91217000  | 4.75963200  | -3.11158900 |
| H  | 0.99409100  | 6.27436900  | -1.57860900 |
| H  | 0.76443400  | 3.03015000  | -4.39624400 |
| H  | 1.23122300  | 5.42850100  | -3.90581800 |
| C  | -2.80551600 | -1.02529400 | 2.38808400  |
| H  | -3.81798000 | -1.36368100 | 2.16086800  |
| H  | -2.13008800 | -1.88456700 | 2.30203000  |
| H  | -2.77069300 | -0.68444900 | 3.42399000  |
| C  | -1.20572100 | 3.53801800  | 1.84657400  |
| H  | -1.90683200 | 3.40880200  | 2.67387600  |
| H  | -0.30643500 | 4.01991100  | 2.24963500  |
| H  | -1.64500600 | 4.22945700  | 1.11996000  |
| O  | -1.35464000 | 1.11815700  | 3.33580000  |
| H  | -0.30611400 | 0.06852100  | 1.74060000  |
| C  | -0.12426000 | 1.39431900  | 4.01611300  |
| H  | -0.39405900 | 1.55728500  | 5.06075200  |
| H  | 0.55430400  | 0.53953500  | 3.93733400  |
| H  | 0.37040700  | 2.28860000  | 3.62562900  |
| O  | 0.39683700  | -0.99542200 | 1.77780400  |
| C  | 1.34249000  | -1.32545100 | 0.96024400  |
| C  | 1.25503400  | -2.59489900 | 0.29419200  |
| C  | 2.51675000  | -0.51971800 | 0.71303100  |
| C  | 2.24334400  | -3.02815900 | -0.58815600 |
| C  | 3.49911300  | -0.93461000 | -0.15455400 |
| C  | 3.42213900  | -2.21600600 | -0.87358600 |
| O  | 4.30129500  | -2.59125500 | -1.66605900 |
| Cl | 2.65882400  | 0.96781300  | 1.59600600  |
| Cl | 4.91334700  | 0.01135800  | -0.45251900 |
| C  | 0.09732900  | -3.39032300 | 0.55442900  |
| C  | 2.14169400  | -4.27824800 | -1.26205700 |
| N  | -0.84614200 | -4.03966500 | 0.76016000  |
| N  | 2.05614200  | -5.30113400 | -1.81137200 |

### Ph (2\_D)

E(B3LYP/BS1) = -2335.656198 au

H(B3LYP/BS1) = -2335.191604 au  
 G(B3LYP/BS1) = -2335.304158 au  
 E(M06-2X/BS2//B3LYP/BS1) = -2335.488257 au

|   |             |             |             |
|---|-------------|-------------|-------------|
| C | 2.20945900  | -0.66349900 | 2.04252400  |
| C | 2.42163700  | 0.73698500  | 1.48051800  |
| C | 2.56454900  | -1.73394800 | 1.02150300  |
| C | 3.38379200  | 0.93901400  | 0.52761000  |
| H | 4.03066600  | 0.09447900  | 0.29969000  |
| C | 1.60550400  | -1.95557400 | 0.04625800  |
| H | 0.70869800  | -1.34266100 | 0.13580000  |
| C | 3.72779500  | 2.15180900  | -0.19344500 |
| C | 2.80387900  | 3.18270400  | -0.48993700 |
| C | 5.05479500  | 2.28114400  | -0.67239000 |
| C | 3.20784900  | 4.30530300  | -1.20336100 |
| H | 1.76248000  | 3.08558000  | -0.20620600 |
| C | 5.45616800  | 3.41222900  | -1.37074400 |
| H | 5.76756400  | 1.48561100  | -0.47240300 |
| C | 4.53364200  | 4.43181800  | -1.63562200 |
| H | 2.48429600  | 5.08140500  | -1.43399700 |
| H | 6.48163900  | 3.50095200  | -1.71656600 |
| H | 4.84254800  | 5.31381200  | -2.18905500 |
| C | 1.58695800  | -2.83789300 | -1.08923600 |
| C | 2.53215400  | -3.86299100 | -1.36608300 |
| C | 0.50685400  | -2.66035700 | -2.00039800 |
| C | 2.40415100  | -4.64798100 | -2.50168800 |
| H | 3.34743500  | -4.05992500 | -0.68415700 |
| C | 0.39214100  | -3.44255300 | -3.13852200 |
| H | -0.22588300 | -1.88709300 | -1.79008800 |
| C | 1.34239700  | -4.43958900 | -3.39467100 |
| H | 3.12904700  | -5.43191600 | -2.69743200 |
| H | -0.43324000 | -3.28573600 | -3.82570800 |
| H | 1.25374100  | -5.05859200 | -4.28246400 |
| C | 1.52937400  | 1.78249900  | 2.07780000  |
| H | 1.95761800  | 2.78450200  | 2.01056000  |
| H | 0.55452900  | 1.78540100  | 1.57260900  |
| H | 1.35056800  | 1.54601200  | 3.13269400  |
| C | 3.89440500  | -2.40896600 | 1.14728400  |
| H | 4.50496500  | -1.90591100 | 1.89939900  |
| H | 3.77038700  | -3.45127900 | 1.47362000  |
| H | 4.43393700  | -2.43295500 | 0.19479400  |
| O | 2.90415100  | -0.76811600 | 3.27073800  |
| H | 1.12463300  | -0.74379100 | 2.22832300  |
| C | 2.37402000  | -1.75732300 | 4.15480200  |
| H | 2.96611800  | -1.70205400 | 5.07028100  |
| H | 1.32084500  | -1.55246100 | 4.38811800  |
| H | 2.45653100  | -2.76831700 | 3.73475900  |
| O | -0.89819700 | 0.16555300  | 0.25754600  |
| C | -2.12379400 | 0.39402700  | 0.15155700  |
| C | -2.63508200 | 1.70472200  | -0.20605400 |
| C | -3.14395700 | -0.64066800 | 0.37993100  |
| C | -4.00375500 | 1.96310500  | -0.33503000 |

|    |             |             |             |
|----|-------------|-------------|-------------|
| C  | -4.48110400 | -0.39140900 | 0.25627900  |
| C  | -5.01010000 | 0.93471600  | -0.11618400 |
| O  | -6.22825500 | 1.15717800  | -0.23276400 |
| Cl | -2.53762300 | -2.21127300 | 0.82530000  |
| Cl | -5.67740600 | -1.62282500 | 0.53004700  |
| C  | -1.66573800 | 2.72557200  | -0.42115600 |
| C  | -4.47906600 | 3.25715800  | -0.69090900 |
| N  | -0.86624100 | 3.55656000  | -0.59064100 |
| N  | -4.86073000 | 4.31877500  | -0.98242200 |

### Ph (2\_A)

E(B3LYP/BS1) = -2335.694636 au

H(B3LYP/BS1) = -2335.228269 au

G(B3LYP/BS1) = -2335.329554 au

E(M06-2X/BS2//B3LYP/BS1) = -2335.568667 au

|   |             |             |             |
|---|-------------|-------------|-------------|
| C | -0.84977900 | 0.28126700  | 1.83825200  |
| C | -2.18893600 | -0.23959900 | 1.28886300  |
| C | -0.27480100 | 1.53015100  | 1.16519900  |
| C | -2.83217300 | 0.41191000  | 0.29769000  |
| H | -2.37727200 | 1.31967100  | -0.08527500 |
| C | 0.10990300  | 1.46413300  | -0.12872600 |
| H | -0.04685300 | 0.52253100  | -0.64990900 |
| C | -4.12758900 | 0.10098800  | -0.33227100 |
| C | -4.64491500 | -1.19932400 | -0.48945800 |
| C | -4.87691100 | 1.17439100  | -0.85571700 |
| C | -5.87329800 | -1.40987900 | -1.11715200 |
| H | -4.07293300 | -2.05474500 | -0.14937400 |
| C | -6.10828800 | 0.96541200  | -1.47238800 |
| H | -4.48493300 | 2.18478100  | -0.76587900 |
| C | -6.61474000 | -0.33082000 | -1.60302200 |
| H | -6.24783800 | -2.42350700 | -1.23259000 |
| H | -6.66970700 | 1.81256400  | -1.85713200 |
| H | -7.57190100 | -0.49858800 | -2.08900600 |
| C | 0.67114800  | 2.51493400  | -0.99449700 |
| C | 1.48893200  | 3.56280200  | -0.52989500 |
| C | 0.41103100  | 2.44127600  | -2.37776600 |
| C | 1.99789800  | 4.51525700  | -1.41320300 |
| H | 1.75966900  | 3.61478700  | 0.51851200  |
| C | 0.91019600  | 3.39920600  | -3.25716500 |
| H | -0.19841000 | 1.62544200  | -2.75916400 |
| C | 1.70427700  | 4.44444700  | -2.77677300 |
| H | 2.63362600  | 5.31056100  | -1.03372100 |
| H | 0.68591000  | 3.32671900  | -4.31786400 |
| H | 2.10092600  | 5.18924700  | -3.46107000 |
| C | -2.76221900 | -1.42523000 | 2.03439800  |
| H | -3.85462600 | -1.37636400 | 2.05794300  |
| H | -2.48154700 | -2.37742100 | 1.57415200  |
| H | -2.39564100 | -1.43777300 | 3.06175300  |
| C | -0.31348700 | 2.81107900  | 1.96677100  |
| H | -1.14661800 | 2.79023700  | 2.67356300  |
| H | 0.60283200  | 2.97316800  | 2.54721600  |
| H | -0.43739400 | 3.67247100  | 1.30526800  |



|    |             |             |             |
|----|-------------|-------------|-------------|
| O  | -1.08442200 | 0.43630300  | 3.19970000  |
| H  | 4.09699400  | -2.81357500 | -2.29101900 |
| C  | -0.01002200 | 0.47905300  | 4.14641200  |
| H  | 0.58050000  | -0.43869800 | 4.10329200  |
| H  | 0.64384900  | 1.34056800  | 4.00036300  |
| H  | -0.49943100 | 0.55529500  | 5.11932000  |
| O  | 4.32531900  | -2.10052000 | -1.66670600 |
| C  | 3.28159600  | -1.83090100 | -0.86555800 |
| C  | 3.44096000  | -0.82665100 | 0.09920600  |
| C  | 2.04770900  | -2.50287100 | -0.93380100 |
| C  | 2.37731600  | -0.49358400 | 0.97518000  |
| C  | 0.99510400  | -2.16743400 | -0.07744400 |
| C  | 1.12735600  | -1.14288000 | 0.89525100  |
| O  | 0.12996100  | -0.91883500 | 1.77103300  |
| Cl | 1.88986100  | -3.76540400 | -2.12490800 |
| Cl | -0.49920100 | -3.03530700 | -0.19051700 |
| C  | 4.69681400  | -0.15257500 | 0.18493500  |
| C  | 2.62449500  | 0.51540600  | 1.95561200  |
| N  | 5.71998000  | 0.39629200  | 0.25453000  |
| N  | 2.89820000  | 1.33504400  | 2.73447300  |

**para-Me-Ph (TS\_A)**

E(B3LYP/BS1) = -2414.289627 au

H(B3LYP/BS1) = -2413.770975 au

G(B3LYP/BS1) = -2413.881977 au

E(M06-2X/BS2//B3LYP/BS1) = -2414.120353 au

|   |             |             |             |
|---|-------------|-------------|-------------|
| C | -1.07154400 | 2.13094500  | -0.82308600 |
| C | -2.38223700 | 1.63040800  | -0.28615800 |
| C | -0.13868000 | 1.26240400  | -1.55160500 |
| C | -2.98863200 | 0.56221600  | -0.86793400 |
| H | -2.51118600 | 0.14856000  | -1.75397000 |
| C | 0.09405600  | -0.00364600 | -1.03001300 |
| H | -0.57741200 | -0.30527400 | -0.23372000 |
| C | -4.24901200 | -0.09048300 | -0.51097500 |
| C | -4.74629900 | -0.18149100 | 0.80472300  |
| C | -4.99448400 | -0.71175000 | -1.53518000 |
| C | -5.94646500 | -0.83625400 | 1.06981100  |
| H | -4.17423400 | 0.22616500  | 1.63056200  |
| C | -6.19783200 | -1.35240500 | -1.26437800 |
| H | -4.62454400 | -0.67396300 | -2.55697100 |
| C | -6.69970300 | -1.42685000 | 0.04491500  |
| H | -6.30218700 | -0.89651300 | 2.09559000  |
| H | -6.75664700 | -1.80804200 | -2.07842200 |
| C | 1.02591500  | -1.04045700 | -1.41105400 |
| C | 2.19261700  | -0.85722800 | -2.19518500 |
| C | 0.79164500  | -2.34008500 | -0.89238300 |
| C | 3.04796100  | -1.91861400 | -2.45434000 |
| H | 2.45304300  | 0.12198200  | -2.57440900 |
| C | 1.64738200  | -3.39692900 | -1.16823800 |
| H | -0.08940000 | -2.51258600 | -0.28027900 |
| C | 2.79410500  | -3.20911400 | -1.95566800 |
| H | 3.94218300  | -1.74461900 | -3.04688400 |

|    |             |             |             |
|----|-------------|-------------|-------------|
| H  | 1.43271000  | -4.38025000 | -0.75885600 |
| C  | -2.97064600 | 2.45685700  | 0.83186700  |
| H  | -4.06126000 | 2.39568500  | 0.84588800  |
| H  | -2.59977300 | 2.12735600  | 1.81035900  |
| H  | -2.68648000 | 3.50578400  | 0.70845500  |
| C  | 0.55007100  | 1.81349100  | -2.77166500 |
| H  | -0.06340300 | 2.59859600  | -3.21935300 |
| H  | 1.53365100  | 2.24519200  | -2.54794300 |
| H  | 0.70056000  | 1.02158200  | -3.51024600 |
| O  | -1.23280600 | 3.43782800  | -1.28490100 |
| H  | -0.35166900 | 2.22315800  | 0.29992000  |
| C  | -0.20374000 | 4.40896200  | -1.04373200 |
| H  | -0.58269700 | 5.34285700  | -1.46213900 |
| H  | -0.03213900 | 4.52759700  | 0.02995200  |
| H  | 0.73714400  | 4.14828300  | -1.53525100 |
| O  | 0.36559200  | 2.24586400  | 1.36841600  |
| C  | 1.22741300  | 1.28416500  | 1.38954800  |
| C  | 0.90715100  | 0.03112400  | 2.02906100  |
| C  | 2.57169300  | 1.43307700  | 0.86076700  |
| C  | 1.80722300  | -1.02128900 | 2.06442800  |
| C  | 3.47481100  | 0.40454100  | 0.88842700  |
| C  | 3.14601800  | -0.91703000 | 1.45678900  |
| O  | 3.93632100  | -1.86246500 | 1.45613800  |
| Cl | 2.98937500  | 2.99014400  | 0.21484900  |
| Cl | 5.08992700  | 0.57502700  | 0.28350300  |
| C  | -0.38282400 | -0.08290800 | 2.63842900  |
| C  | 1.49273500  | -2.25238700 | 2.70922900  |
| N  | -1.42888900 | -0.17930900 | 3.13776000  |
| N  | 1.23757000  | -3.25892700 | 3.23534200  |
| C  | -7.98819500 | -2.15386400 | 0.34322700  |
| H  | -7.81209000 | -3.23032100 | 0.47192200  |
| H  | -8.45026200 | -1.78703700 | 1.26517000  |
| H  | -8.70964800 | -2.04075900 | -0.47289100 |
| C  | 3.71662900  | -4.35655700 | -2.27390000 |
| H  | 3.44065400  | -4.81923200 | -3.23110400 |
| H  | 4.75497000  | -4.02194000 | -2.36347300 |
| H  | 3.66556200  | -5.13542600 | -1.50721200 |

**para-Me-Ph (TS\_B)**

E(B3LYP/BS1) = -2414.277013 au

H(B3LYP/BS1) = -2413.757561 au

G(B3LYP/BS1) = -2413.869674 au

E(M06-2X/BS2//B3LYP/BS1) = -2414.109757 au

|   |             |             |             |
|---|-------------|-------------|-------------|
| C | 0.05018200  | -0.91591800 | -2.05976600 |
| C | 1.38659400  | -0.31597900 | -2.01765600 |
| C | -1.16462000 | -0.00411500 | -2.01690900 |
| C | 1.56326800  | 0.71214700  | -1.11335200 |
| H | 0.65744100  | 1.04706400  | -0.61319800 |
| C | -1.93698500 | 0.15813900  | -0.92706400 |
| H | -1.63696000 | -0.35072400 | -0.01598700 |
| C | 2.72956700  | 1.49003800  | -0.74929200 |
| C | 4.06962100  | 1.20090200  | -1.10252000 |

|    |             |             |             |
|----|-------------|-------------|-------------|
| C  | 2.50159800  | 2.63734300  | 0.05008400  |
| C  | 5.10485500  | 2.03270100  | -0.69534300 |
| H  | 4.31185800  | 0.31657700  | -1.67378000 |
| C  | 3.54202400  | 3.46600500  | 0.44360800  |
| H  | 1.48464200  | 2.87805000  | 0.34807300  |
| C  | 4.86743600  | 3.18038500  | 0.07866400  |
| H  | 6.12417800  | 1.78565300  | -0.98060200 |
| H  | 3.32900500  | 4.34517100  | 1.04601900  |
| C  | -3.14251800 | 0.99243400  | -0.76701100 |
| C  | -4.12197800 | 1.14199400  | -1.76444000 |
| C  | -3.36274600 | 1.63387600  | 0.46672400  |
| C  | -5.25385300 | 1.92599500  | -1.54384600 |
| H  | -4.02164400 | 0.61343800  | -2.70665900 |
| C  | -4.48951500 | 2.42287400  | 0.67699200  |
| H  | -2.63544400 | 1.51744000  | 1.26630000  |
| C  | -5.45536100 | 2.59059200  | -0.32703000 |
| H  | -5.99958800 | 2.01356800  | -2.33046800 |
| H  | -4.62671100 | 2.91138000  | 1.63890400  |
| C  | 2.47020000  | -0.90019800 | -2.88833300 |
| H  | 3.06151600  | -0.09653300 | -3.33763100 |
| H  | 3.15758300  | -1.53789900 | -2.31952600 |
| H  | 2.03969000  | -1.50181500 | -3.68853700 |
| C  | -1.36439800 | 0.71563800  | -3.33881900 |
| H  | -0.39930300 | 1.03347400  | -3.74681500 |
| H  | -1.83750900 | 0.07678800  | -4.09472200 |
| H  | -1.99138100 | 1.60004400  | -3.20732000 |
| O  | -0.03549600 | -1.94983900 | -2.95020500 |
| H  | 0.12272900  | -1.60753600 | -0.78926900 |
| C  | -1.26793000 | -2.68960400 | -3.02540300 |
| H  | -2.08959800 | -2.06185300 | -3.37811300 |
| H  | -1.07636100 | -3.48970800 | -3.73988900 |
| H  | -1.51998900 | -3.11636200 | -2.05024700 |
| O  | -1.57700300 | -3.38515900 | 0.70991900  |
| C  | -0.75303700 | -2.55368000 | 1.04077900  |
| C  | 0.54850200  | -2.38883900 | 0.26565200  |
| C  | -0.97400100 | -1.61267700 | 2.17058500  |
| C  | 1.62899900  | -1.68918500 | 0.90615800  |
| C  | 0.00063400  | -0.77089800 | 2.59125300  |
| C  | 1.39888000  | -0.78593200 | 2.01589800  |
| O  | 2.27811900  | -0.09141600 | 2.52158900  |
| Cl | -2.54023200 | -1.69325900 | 2.90530200  |
| Cl | -0.24711400 | 0.34391300  | 3.88152500  |
| C  | 0.90115700  | -3.59323900 | -0.46620600 |
| C  | 2.97176700  | -1.88595100 | 0.50612700  |
| N  | 1.19295200  | -4.54837900 | -1.05839700 |
| N  | 4.07939000  | -2.06466200 | 0.18256900  |
| C  | -6.66584600 | 3.46516100  | -0.10369900 |
| H  | -7.49183000 | 3.18185500  | -0.76377000 |
| H  | -7.01757300 | 3.40523400  | 0.93180200  |
| H  | -6.43307300 | 4.51938300  | -0.30503600 |
| C  | 6.00515100  | 4.05833000  | 0.53281400  |

|   |            |            |             |
|---|------------|------------|-------------|
| H | 5.68158100 | 5.09509100 | 0.66853400  |
| H | 6.40090700 | 3.71139500 | 1.49686900  |
| H | 6.83348400 | 4.04225700 | -0.18248900 |

**para-Me-Ph (TS\_D)**

E(B3LYP/BS1) = -2414.272744 au

H(B3LYP/BS1) = -2413.756051 au

G(B3LYP/BS1) = -2413.873462 au

E(M06-2X/BS2//B3LYP/BS1) = -2414.095142 au

|   |             |             |             |
|---|-------------|-------------|-------------|
| C | -0.73835500 | 0.85794300  | 2.39215000  |
| C | -2.05903100 | 0.46729800  | 1.86993800  |
| C | 0.07186400  | 1.94189900  | 1.76319500  |
| C | -2.56370400 | 1.06178600  | 0.72981300  |
| H | -2.04288000 | 1.94953500  | 0.38102800  |
| C | 0.46627000  | 1.78173300  | 0.46509200  |
| H | 0.16226500  | 0.84957900  | -0.00839800 |
| C | -3.74116800 | 0.72659900  | -0.04729500 |
| C | -4.31553500 | -0.56405100 | -0.13058800 |
| C | -4.32954800 | 1.75077000  | -0.82806000 |
| C | -5.43238000 | -0.79606600 | -0.92382900 |
| H | -3.85786600 | -1.39893700 | 0.38655900  |
| C | -5.45392600 | 1.51222100  | -1.60593700 |
| H | -3.89279900 | 2.74605000  | -0.80679300 |
| C | -6.03501700 | 0.23447000  | -1.66484200 |
| H | -5.84196000 | -1.80158900 | -0.98057400 |
| H | -5.88681700 | 2.32383900  | -2.18538500 |
| C | 1.20207700  | 2.65685900  | -0.44180100 |
| C | 1.95719900  | 3.79058000  | -0.06840100 |
| C | 1.17993200  | 2.32342900  | -1.81573000 |
| C | 2.62749700  | 4.54933000  | -1.02341900 |
| H | 2.05455700  | 4.06999600  | 0.97203400  |
| C | 1.84425000  | 3.09136500  | -2.76333500 |
| H | 0.62441100  | 1.44543200  | -2.13598200 |
| C | 2.57888900  | 4.22681300  | -2.38776500 |
| H | 3.20911500  | 5.40936600  | -0.70019800 |
| H | 1.79958500  | 2.80402100  | -3.81103400 |
| C | -2.79905000 | -0.60028400 | 2.64138500  |
| H | -3.87756000 | -0.51299400 | 2.49506700  |
| H | -2.49206500 | -1.60352300 | 2.32301900  |
| H | -2.57865600 | -0.51180100 | 3.70621700  |
| C | 0.36477600  | 3.15765400  | 2.61162000  |
| H | -0.26521300 | 3.16116800  | 3.50333500  |
| H | 1.40974300  | 3.20135400  | 2.94305900  |
| H | 0.16747900  | 4.07232700  | 2.04240300  |
| O | -0.70076700 | 0.80346800  | 3.78609600  |
| H | -0.10412800 | -0.31943400 | 1.98615100  |
| C | 0.54460200  | 0.48213600  | 4.41586900  |
| H | 0.36836100  | 0.58121500  | 5.48836700  |
| H | 0.83773300  | -0.54611700 | 4.18290800  |
| H | 1.34608700  | 1.16485200  | 4.11717900  |
| O | 0.19389700  | -1.52797700 | 1.79052300  |
| C | 0.95727000  | -1.96848500 | 0.84267300  |

|    |             |             |             |
|----|-------------|-------------|-------------|
| C  | 0.42644900  | -2.94563900 | -0.06530500 |
| C  | 2.33716400  | -1.57502700 | 0.67151200  |
| C  | 1.19268800  | -3.47051800 | -1.10506300 |
| C  | 3.10494800  | -2.08524400 | -0.34833300 |
| C  | 2.57770900  | -3.06035300 | -1.31576600 |
| O  | 3.26250200  | -3.51457400 | -2.24662400 |
| Cl | 2.99769100  | -0.47009000 | 1.83570500  |
| Cl | 4.75811600  | -1.63240400 | -0.56146200 |
| C  | -0.93200500 | -3.34489700 | 0.12431200  |
| C  | 0.65422700  | -4.42126600 | -2.01782800 |
| N  | -2.03858400 | -3.67268600 | 0.27273100  |
| N  | 0.21089200  | -5.19866000 | -2.76247500 |
| C  | 3.28047800  | 5.07730400  | -3.41746200 |
| H  | 2.60668100  | 5.84874600  | -3.81417600 |
| H  | 4.14687100  | 5.59175600  | -2.98960600 |
| H  | 3.62042600  | 4.47712700  | -4.26782800 |
| C  | -7.27016000 | -0.02215100 | -2.49038100 |
| H  | -7.33607400 | 0.66696900  | -3.33834300 |
| H  | -7.28967400 | -1.04736200 | -2.87399000 |
| H  | -8.17801900 | 0.11568800  | -1.88741700 |

**para-Me-Ph (2\_D)**

E(B3LYP/BS1) = -2414.298894 au

H(B3LYP/BS1) = -2413.775313 au

G(B3LYP/BS1) = -2413.89553 au

E(M06-2X/BS2//B3LYP/BS1) = -2414.109437 au

|   |             |             |             |
|---|-------------|-------------|-------------|
| C | -2.69596600 | 1.50781400  | 2.11597700  |
| C | -2.79124300 | 0.10601500  | 1.53151900  |
| C | -2.47140900 | 2.35160000  | 0.85626400  |
| C | -3.97055500 | -0.24650600 | 0.91382600  |
| H | -4.78409500 | 0.46774700  | 1.01184300  |
| C | -1.17322500 | 2.42549700  | 0.38671600  |
| H | -0.43223600 | 1.88563300  | 0.97388000  |
| C | -4.33245300 | -1.46200000 | 0.22276400  |
| C | -3.41319300 | -2.35515500 | -0.38528400 |
| C | -5.71533600 | -1.75504000 | 0.09395900  |
| C | -3.86336600 | -3.48649900 | -1.04869200 |
| H | -2.35093500 | -2.14266600 | -0.38910400 |
| C | -6.15179400 | -2.89729800 | -0.55584600 |
| H | -6.44044200 | -1.07127600 | 0.52703800  |
| C | -5.23420500 | -3.79340600 | -1.13555500 |
| H | -3.13950400 | -4.14444000 | -1.52196500 |
| H | -7.21663700 | -3.10162600 | -0.62791200 |
| C | -0.60335600 | 3.10521600  | -0.74673800 |
| C | -1.30439600 | 3.91178700  | -1.68540300 |
| C | 0.80017000  | 2.95610300  | -0.93407500 |
| C | -0.63609100 | 4.51975800  | -2.73329200 |
| H | -2.37040700 | 4.06286400  | -1.59781900 |
| C | 1.45540700  | 3.56888300  | -1.98805800 |
| H | 1.35289600  | 2.32640600  | -0.24325500 |
| C | 0.75492700  | 4.36807100  | -2.90941300 |
| H | -1.19613200 | 5.12805800  | -3.43839800 |

|    |             |             |             |
|----|-------------|-------------|-------------|
| H  | 2.52610400  | 3.42885600  | -2.10851200 |
| C  | -1.59078400 | -0.77614400 | 1.71440300  |
| H  | -1.86023800 | -1.83249300 | 1.65984700  |
| H  | -0.80224700 | -0.59389600 | 0.97384500  |
| H  | -1.14375000 | -0.58457800 | 2.69664200  |
| C  | -3.67507900 | 2.98531700  | 0.21912000  |
| H  | -4.57624100 | 2.76478700  | 0.79236000  |
| H  | -3.55631400 | 4.07598200  | 0.20004700  |
| H  | -3.82258800 | 2.65287400  | -0.81362100 |
| O  | -3.86250400 | 1.83575700  | 2.83437700  |
| H  | -1.81599500 | 1.57216200  | 2.76929100  |
| C  | -3.73325100 | 3.02410300  | 3.61430700  |
| H  | -4.67462600 | 3.14346800  | 4.15388600  |
| H  | -2.90891700 | 2.93236000  | 4.33430000  |
| H  | -3.56250000 | 3.90969800  | 2.98832300  |
| O  | 1.49607700  | 0.12781500  | 0.62617000  |
| C  | 2.51033100  | -0.58051200 | 0.44762100  |
| C  | 2.45648900  | -1.85835300 | -0.24018800 |
| C  | 3.84455700  | -0.17411900 | 0.91910100  |
| C  | 3.59486100  | -2.64768600 | -0.43925600 |
| C  | 4.95647900  | -0.94288600 | 0.72701900  |
| C  | 4.91185500  | -2.24149100 | 0.02733400  |
| O  | 5.92688100  | -2.93814100 | -0.15043400 |
| Cl | 3.91425100  | 1.35598600  | 1.74781600  |
| Cl | 6.52580900  | -0.45323600 | 1.29425600  |
| C  | 1.17953300  | -2.27701400 | -0.71037000 |
| C  | 3.51531300  | -3.89696500 | -1.11739400 |
| N  | 0.13358800  | -2.61849700 | -1.09472800 |
| N  | 3.44186000  | -4.91855700 | -1.67311700 |
| C  | -5.70461900 | -5.04750000 | -1.82172600 |
| H  | -6.70158400 | -4.91856300 | -2.25455600 |
| H  | -5.01435100 | -5.35464700 | -2.61342500 |
| H  | -5.76638600 | -5.87742400 | -1.10431300 |
| C  | 1.46593300  | 5.06098500  | -4.03881700 |
| H  | 0.85516700  | 5.07301300  | -4.94759100 |
| H  | 1.67220900  | 6.10787800  | -3.77660700 |
| H  | 2.42374000  | 4.58354900  | -4.26437100 |

**para-Me-Ph (2\_A)**

E(B3LYP/BS1) = -2414.331407 au

H(B3LYP/BS1) = -2413.806346 au

G(B3LYP/BS1) = -2413.917727 au

E(M06-2X/BS2//B3LYP/BS1) = -2414.184597 au

|   |             |             |             |
|---|-------------|-------------|-------------|
| C | -0.61379900 | -0.38697600 | 2.00150000  |
| C | -2.00563000 | -0.62935200 | 1.39676300  |
| C | 0.05335100  | 0.94995900  | 1.67329200  |
| C | -2.62147600 | 0.32697700  | 0.66979800  |
| H | -2.09676100 | 1.26729100  | 0.53470200  |
| C | 0.39381100  | 1.22003500  | 0.39292800  |
| H | 0.13644000  | 0.47725900  | -0.35889600 |
| C | -3.95937700 | 0.31940200  | 0.05616700  |
| C | -4.64093300 | -0.83126900 | -0.38329900 |

|    |             |             |             |
|----|-------------|-------------|-------------|
| C  | -4.59265100 | 1.56182100  | -0.15226000 |
| C  | -5.90183800 | -0.73864400 | -0.97157200 |
| H  | -4.17443200 | -1.80562700 | -0.30013400 |
| C  | -5.85543500 | 1.64752000  | -0.72942900 |
| H  | -4.08139500 | 2.47254000  | 0.15129500  |
| C  | -6.54072200 | 0.49608500  | -1.14563100 |
| H  | -6.39568400 | -1.64693000 | -1.30964300 |
| H  | -6.31502000 | 2.62370800  | -0.86734100 |
| C  | 1.02336800  | 2.42064100  | -0.17831300 |
| C  | 1.92654800  | 3.24949300  | 0.51320200  |
| C  | 0.74598400  | 2.74140400  | -1.52227300 |
| C  | 2.49482600  | 4.36184500  | -0.10572300 |
| H  | 2.22151000  | 3.00512100  | 1.52731500  |
| C  | 1.30730500  | 3.85968300  | -2.13028900 |
| H  | 0.07435400  | 2.10327600  | -2.09194000 |
| C  | 2.18896600  | 4.69815800  | -1.43132500 |
| H  | 3.19874300  | 4.97553900  | 0.45162900  |
| H  | 1.06512900  | 4.08219300  | -3.16700200 |
| C  | -2.65537800 | -1.93477800 | 1.80255900  |
| H  | -3.72818300 | -1.79690400 | 1.96939300  |
| H  | -2.53642000 | -2.70994600 | 1.03939600  |
| H  | -2.21012100 | -2.31093400 | 2.72430600  |
| C  | 0.15580300  | 1.95342000  | 2.79917100  |
| H  | -0.64667800 | 1.79374800  | 3.52342200  |
| H  | 1.10571100  | 1.88280200  | 3.34307500  |
| H  | 0.07782000  | 2.97227900  | 2.41037900  |
| O  | -0.79926300 | -0.60397000 | 3.36233600  |
| H  | 3.94253400  | -2.59582000 | -3.04901100 |
| C  | 0.29954200  | -0.90880900 | 4.22954300  |
| H  | 0.80422800  | -1.82253400 | 3.90806200  |
| H  | 1.02401300  | -0.09490800 | 4.29100800  |
| H  | -0.15473300 | -1.06577900 | 5.20983700  |
| O  | 4.24819600  | -2.09903300 | -2.26773300 |
| C  | 3.25157600  | -1.97892000 | -1.37509700 |
| C  | 3.52130400  | -1.29593700 | -0.18131200 |
| C  | 1.96171100  | -2.50611500 | -1.56723700 |
| C  | 2.51222800  | -1.13762700 | 0.80192700  |
| C  | 0.96367000  | -2.34165900 | -0.60275400 |
| C  | 1.20888900  | -1.64205100 | 0.60748100  |
| O  | 0.25792600  | -1.59525400 | 1.55783800  |
| Cl | 1.66493500  | -3.36852100 | -3.05261600 |
| Cl | -0.60348100 | -3.02499500 | -0.87879500 |
| C  | 4.83303800  | -0.77102600 | 0.02551400  |
| C  | 2.87074200  | -0.46323700 | 2.00902400  |
| N  | 5.90176200  | -0.34356500 | 0.19321500  |
| N  | 3.23594400  | 0.08296100  | 2.96907800  |
| C  | 2.78033900  | 5.92462300  | -2.08395400 |
| H  | 2.10199000  | 6.78404300  | -1.99697900 |
| H  | 3.72802200  | 6.20962500  | -1.61584500 |
| H  | 2.95998500  | 5.76286500  | -3.15219500 |
| C  | -7.92174900 | 0.58610800  | -1.74980000 |

|   |             |             |             |
|---|-------------|-------------|-------------|
| H | -8.03783800 | 1.49446500  | -2.35080800 |
| H | -8.13690200 | -0.27702100 | -2.38802200 |
| H | -8.69391400 | 0.61506400  | -0.96920900 |

**para-OMe-Ph (TS\_A)**

E(B3LYP/BS1) = -2564.705785 au

H(B3LYP/BS1) = -2564.175125 au

G(B3LYP/BS1) = -2564.287812 au

E(M06-2X/BS2//B3LYP/BS1) = -2564.543547 au

|   |             |             |             |
|---|-------------|-------------|-------------|
| C | -0.93796200 | 2.19087300  | -1.05205100 |
| C | -2.26449600 | 1.77526200  | -0.48478300 |
| C | 0.00554200  | 1.22860600  | -1.63050600 |
| C | -2.87014300 | 0.64185300  | -0.93069400 |
| H | -2.37919300 | 0.11314000  | -1.74558900 |
| C | 0.20623800  | 0.03210900  | -0.94774500 |
| H | -0.49956700 | -0.16631800 | -0.14872300 |
| C | -4.13686900 | 0.04608000  | -0.51458300 |
| C | -4.67933800 | 0.15616400  | 0.78706400  |
| C | -4.84796000 | -0.73604200 | -1.44618700 |
| C | -5.87820300 | -0.45437800 | 1.11836200  |
| H | -4.13535500 | 0.68927900  | 1.55817000  |
| C | -6.05943900 | -1.34427000 | -1.13154800 |
| H | -4.44406200 | -0.86172900 | -2.44771100 |
| C | -6.58798200 | -1.19977000 | 0.16046700  |
| H | -6.28453200 | -0.37761700 | 2.12212000  |
| H | -6.57524300 | -1.92749500 | -1.88512900 |
| C | 1.14836100  | -1.03619200 | -1.14949500 |
| C | 2.35549900  | -0.94786200 | -1.88884900 |
| C | 0.89236600  | -2.26643700 | -0.47767700 |
| C | 3.24250800  | -2.01062700 | -1.96378400 |
| H | 2.62791900  | -0.02468500 | -2.38242200 |
| C | 1.75925000  | -3.33516800 | -0.55801800 |
| H | -0.02092700 | -2.36842100 | 0.10148400  |
| C | 2.95347400  | -3.21757800 | -1.29755500 |
| H | 4.16148900  | -1.89330500 | -2.52476100 |
| H | 1.55118400  | -4.26968100 | -0.04779300 |
| C | -2.86960000 | 2.74784700  | 0.49884200  |
| H | -3.96152700 | 2.70900500  | 0.48294600  |
| H | -2.53762700 | 2.54195600  | 1.52416700  |
| H | -2.56053800 | 3.76769100  | 0.25215900  |
| C | 0.74785000  | 1.61620100  | -2.88195800 |
| H | 0.16307200  | 2.34578400  | -3.44667900 |
| H | 1.72815900  | 2.06416200  | -2.67556700 |
| H | 0.91489000  | 0.73763800  | -3.51100700 |
| O | -1.07928400 | 3.42107600  | -1.70399100 |
| H | -0.24829400 | 2.43935400  | 0.05734600  |
| C | -0.07360800 | 4.42907800  | -1.53167800 |
| H | -0.41397400 | 5.28324100  | -2.11981000 |
| H | 0.00933000  | 4.71608900  | -0.47907200 |
| H | 0.90558200  | 4.10682700  | -1.89609300 |
| O | 0.45194800  | 2.61503000  | 1.13701100  |
| C | 1.29965100  | 1.65435500  | 1.30469300  |



|    |             |             |             |
|----|-------------|-------------|-------------|
| C  | 0.95041600  | 0.49824900  | 2.09084400  |
| C  | 2.65151200  | 1.71035800  | 0.78109600  |
| C  | 1.82718800  | -0.56340300 | 2.25995900  |
| C  | 3.53140200  | 0.67256100  | 0.94014500  |
| C  | 3.16621500  | -0.56778500 | 1.64914900  |
| O  | 3.92936600  | -1.53216800 | 1.75177300  |
| Cl | 3.10882100  | 3.16841100  | -0.04759100 |
| Cl | 5.15685400  | 0.73843400  | 0.33861000  |
| C  | -0.34614600 | 0.48451700  | 2.69620500  |
| C  | 1.47930800  | -1.69963600 | 3.04587400  |
| N  | -1.39747200 | 0.46909500  | 3.19399600  |
| N  | 1.19628900  | -2.62859100 | 3.68805300  |
| O  | 3.74595100  | -4.30487300 | -1.30765800 |
| O  | -7.75621500 | -1.74646200 | 0.58406200  |
| C  | -8.52315600 | -2.51979700 | -0.33875600 |
| H  | -7.96500500 | -3.39886700 | -0.68128800 |
| H  | -9.40849800 | -2.84260500 | 0.21017900  |
| H  | -8.82772200 | -1.91901200 | -1.20355900 |
| C  | 4.99513600  | -4.25251400 | -2.00670500 |
| H  | 5.45245200  | -5.23080600 | -1.85980500 |
| H  | 4.83980100  | -4.07506500 | -3.07608500 |
| H  | 5.64375600  | -3.47519000 | -1.58947600 |

### para-OMe-Ph (TS\_B)

E(B3LYP/BS1) = -2564.692252 au

H(B3LYP/BS1) = -2564.161079 au

G(B3LYP/BS1) = -2564.275806 au

E(M06-2X/BS2//B3LYP/BS1) = -2564.530866 au

|   |             |             |             |
|---|-------------|-------------|-------------|
| C | 0.10931400  | -1.25753600 | -2.00505300 |
| C | 1.44192600  | -0.65480900 | -1.95880700 |
| C | -1.10514400 | -0.34706300 | -2.06707700 |
| C | 1.58720700  | 0.44796800  | -1.13554700 |
| H | 0.66275000  | 0.82040900  | -0.70010800 |
| C | -1.89894900 | -0.09272800 | -1.00963300 |
| H | -1.61269700 | -0.52102700 | -0.05368400 |
| C | 2.73487500  | 1.24985100  | -0.79156300 |
| C | 4.08763600  | 0.94179600  | -1.07558500 |
| C | 2.48265300  | 2.45645000  | -0.08183700 |
| C | 5.12000600  | 1.79191900  | -0.70318000 |
| H | 4.34875900  | 0.01745200  | -1.56973900 |
| C | 3.49931400  | 3.31310400  | 0.28487700  |
| H | 1.45735700  | 2.71447400  | 0.16822600  |
| C | 4.83516400  | 2.99142000  | -0.02687800 |
| H | 6.14109800  | 1.51438800  | -0.93491100 |
| H | 3.29529800  | 4.23586300  | 0.81806300  |
| C | -3.10764200 | 0.74499600  | -0.93917600 |
| C | -4.04958100 | 0.85374400  | -1.98346500 |
| C | -3.37931700 | 1.44212500  | 0.25041700  |
| C | -5.18264000 | 1.64431800  | -1.85161500 |
| H | -3.91469300 | 0.28649600  | -2.89788700 |
| C | -4.50717700 | 2.24865800  | 0.39445100  |
| H | -2.68538900 | 1.36419600  | 1.08347200  |

|    |             |             |             |
|----|-------------|-------------|-------------|
| C  | -5.41799100 | 2.35795100  | -0.66551600 |
| H  | -5.90893900 | 1.71537600  | -2.65545700 |
| H  | -4.66778600 | 2.77590400  | 1.32746300  |
| C  | 2.55937200  | -1.30184200 | -2.73711400 |
| H  | 3.15404900  | -0.53439000 | -3.24289200 |
| H  | 3.23763600  | -1.87173400 | -2.09057400 |
| H  | 2.16232800  | -1.98239500 | -3.48978900 |
| C  | -1.27618400 | 0.26119900  | -3.44796000 |
| H  | -0.29942100 | 0.49835100  | -3.88189900 |
| H  | -1.78198500 | -0.41589900 | -4.14748300 |
| H  | -1.86065000 | 1.18262200  | -3.39413300 |
| O  | 0.05151500  | -2.34761600 | -2.83395800 |
| H  | 0.13240200  | -1.86531800 | -0.70147300 |
| C  | -1.17692100 | -3.09346500 | -2.89399000 |
| H  | -1.98683300 | -2.49707000 | -3.32091700 |
| H  | -0.96230700 | -3.94518100 | -3.53920000 |
| H  | -1.46380800 | -3.44681600 | -1.89939200 |
| O  | -1.63129900 | -3.54448800 | 0.84681100  |
| C  | -0.81132900 | -2.69987100 | 1.15677800  |
| C  | 0.51667800  | -2.58897700 | 0.42327700  |
| C  | -1.06444600 | -1.69238100 | 2.22050300  |
| C  | 1.57784700  | -1.85031000 | 1.05351300  |
| C  | -0.10047200 | -0.82931100 | 2.62260800  |
| C  | 1.31487800  | -0.87815000 | 2.09374900  |
| O  | 2.17803300  | -0.14927800 | 2.58052100  |
| Cl | -2.65499900 | -1.72427100 | 2.90651500  |
| Cl | -0.38711000 | 0.36137400  | 3.83588100  |
| C  | 0.89004400  | -3.83527300 | -0.22116900 |
| C  | 2.93180400  | -2.06434000 | 0.70523500  |
| N  | 1.20085900  | -4.82512800 | -0.74281000 |
| N  | 4.04987400  | -2.25398300 | 0.42590800  |
| O  | 5.76229500  | 3.88764300  | 0.36903800  |
| O  | -6.55307800 | 3.10821600  | -0.63922900 |
| C  | -6.85225800 | 3.84457100  | 0.54517000  |
| H  | -7.79018600 | 4.36345300  | 0.34312100  |
| H  | -6.98179200 | 3.17882000  | 1.40669900  |
| H  | -6.06913900 | 4.57941800  | 0.76648400  |
| C  | 7.14285100  | 3.62613300  | 0.09582500  |
| H  | 7.32315500  | 3.55144300  | -0.98193800 |
| H  | 7.68763600  | 4.47927400  | 0.50024100  |
| H  | 7.47505900  | 2.70822300  | 0.59240900  |

**para-OMe-Ph (TS\_D)**

E(B3LYP/BS1) = -2564.688141 au

H(B3LYP/BS1) = -2564.159368 au

G(B3LYP/BS1) = -2564.278339 au

E(M06-2X/BS2//B3LYP/BS1) = -2564.517583 au

|   |             |             |            |
|---|-------------|-------------|------------|
| C | 0.45131400  | -0.50342900 | 2.63796400 |
| C | 1.82843500  | -0.46265000 | 2.12190100 |
| C | -0.56859500 | -1.45330800 | 2.11235600 |
| C | 2.21707300  | -1.29986700 | 1.09375800 |
| H | 1.52712900  | -2.10243900 | 0.84603600 |

|    |             |             |             |
|----|-------------|-------------|-------------|
| C  | -0.89011900 | -1.39183700 | 0.78432700  |
| H  | -0.36712300 | -0.62872900 | 0.20994200  |
| C  | 3.44437000  | -1.32573700 | 0.32815800  |
| C  | 4.29550700  | -0.21647800 | 0.11589400  |
| C  | 3.80279000  | -2.54392200 | -0.30851800 |
| C  | 5.44998300  | -0.31749900 | -0.65222600 |
| H  | 4.03291300  | 0.75483200  | 0.51677900  |
| C  | 4.95373600  | -2.66066500 | -1.06259600 |
| H  | 3.15801900  | -3.41035800 | -0.18659500 |
| C  | 5.79710000  | -1.54608900 | -1.23857800 |
| H  | 6.06479100  | 0.56238100  | -0.79983700 |
| H  | 5.22566400  | -3.59956400 | -1.53448900 |
| C  | -1.79147100 | -2.18743000 | -0.03771800 |
| C  | -2.77230600 | -3.08716100 | 0.43166400  |
| C  | -1.69266600 | -2.02855800 | -1.44358500 |
| C  | -3.59202100 | -3.79996100 | -0.44035700 |
| H  | -2.92943100 | -3.22525900 | 1.49260400  |
| C  | -2.49401500 | -2.73581000 | -2.32076100 |
| H  | -0.95866500 | -1.33421600 | -1.84451400 |
| C  | -3.45455800 | -3.63637400 | -1.82660200 |
| H  | -4.33614900 | -4.47273900 | -0.03063100 |
| H  | -2.40093600 | -2.60763800 | -3.39464800 |
| C  | 2.76293400  | 0.53217000  | 2.77157200  |
| H  | 3.79819200  | 0.18684800  | 2.72101000  |
| H  | 2.70740300  | 1.51079600  | 2.28021200  |
| H  | 2.49006500  | 0.67369900  | 3.81823700  |
| C  | -1.15777400 | -2.44155900 | 3.09260800  |
| H  | -0.58383700 | -2.44646600 | 4.02117800  |
| H  | -2.20123700 | -2.21676600 | 3.34682300  |
| H  | -1.13825800 | -3.45174600 | 2.66888900  |
| O  | 0.41053500  | -0.27092500 | 4.01620000  |
| H  | 0.07980700  | 0.74380800  | 2.05877000  |
| C  | -0.73105900 | 0.40684200  | 4.55074500  |
| H  | -0.59386300 | 0.41090200  | 5.63374600  |
| H  | -0.77758200 | 1.43599900  | 4.18135100  |
| H  | -1.66685700 | -0.10712200 | 4.30877300  |
| O  | 0.03718200  | 1.92646900  | 1.71002200  |
| C  | -0.60713400 | 2.36802800  | 0.67536300  |
| C  | 0.12715700  | 3.05865500  | -0.34557600 |
| C  | -2.03795000 | 2.25554800  | 0.51334500  |
| C  | -0.50292100 | 3.57414200  | -1.47761700 |
| C  | -2.67299500 | 2.75806200  | -0.59775400 |
| C  | -1.94326000 | 3.44271000  | -1.67640400 |
| O  | -2.50976100 | 3.88885100  | -2.68719400 |
| Cl | -2.92630600 | 1.50463600  | 1.80127100  |
| Cl | -4.38381600 | 2.64021400  | -0.80336400 |
| C  | 1.53923900  | 3.18268800  | -0.16746600 |
| C  | 0.23234800  | 4.24130100  | -2.49795100 |
| N  | 2.69006000  | 3.28584400  | -0.03004900 |
| N  | 0.83641000  | 4.78654600  | -3.33056000 |
| O  | -4.19556000 | -4.28450600 | -2.76045500 |

|   |             |             |             |
|---|-------------|-------------|-------------|
| C | -5.19397200 | -5.20631900 | -2.32183100 |
| H | -5.65147700 | -5.60070000 | -3.22979200 |
| H | -4.75067000 | -6.02857800 | -1.74842900 |
| H | -5.95735500 | -4.70575100 | -1.71512400 |
| O | 6.90022700  | -1.75564500 | -1.99471500 |
| C | 7.79576700  | -0.66507400 | -2.22299000 |
| H | 8.21008400  | -0.28995500 | -1.28052800 |
| H | 8.59887200  | -1.06810400 | -2.84054900 |
| H | 7.29668700  | 0.15122100  | -2.75698900 |

**para-OMe-Ph (2\_D)**

E(B3LYP/BS1) = -2564.718045 au

H(B3LYP/BS1) = -2564.18256 au

G(B3LYP/BS1) = -2564.306933 au

E(M06-2X/BS2//B3LYP/BS1) = -2564.535983 au

|   |             |             |             |
|---|-------------|-------------|-------------|
| C | -1.27825000 | 0.82693700  | 2.65818600  |
| C | -2.12742100 | -0.23565600 | 1.97150400  |
| C | -1.23527100 | 2.14472800  | 1.89685900  |
| C | -3.11394500 | 0.13410000  | 1.10399400  |
| H | -3.31832100 | 1.19986800  | 1.02352800  |
| C | -0.31572600 | 2.20877000  | 0.87084500  |
| H | 0.27955700  | 1.30655300  | 0.73383700  |
| C | -3.98932900 | -0.69107600 | 0.29397700  |
| C | -3.65028600 | -1.98002500 | -0.19464200 |
| C | -5.24558500 | -0.16042500 | -0.08464600 |
| C | -4.53301700 | -2.69830500 | -0.97691100 |
| H | -2.67029900 | -2.39985000 | -0.00073400 |
| C | -6.14687900 | -0.87689100 | -0.85733200 |
| H | -5.51924500 | 0.83515900  | 0.25434200  |
| C | -5.79635700 | -2.16361200 | -1.30729900 |
| H | -4.26808700 | -3.67707500 | -1.36356000 |
| H | -7.10425900 | -0.43798400 | -1.11080600 |
| C | -0.00528500 | 3.24730600  | -0.07026700 |
| C | -0.54152500 | 4.56797100  | -0.08218200 |
| C | 0.94183500  | 2.92334700  | -1.08312800 |
| C | -0.16305400 | 5.47874300  | -1.04228700 |
| H | -1.24571400 | 4.88299900  | 0.67474800  |
| C | 1.32547700  | 3.82627300  | -2.05572400 |
| H | 1.37060900  | 1.92558500  | -1.08910500 |
| C | 0.77040800  | 5.12276000  | -2.04531300 |
| H | -0.56598300 | 6.48605200  | -1.04988100 |
| H | 2.04522200  | 3.53238700  | -2.80977100 |
| C | -1.76986200 | -1.64121700 | 2.36196800  |
| H | -2.60642300 | -2.33298300 | 2.24214200  |
| H | -0.92771100 | -2.00752900 | 1.76094600  |
| H | -1.45408100 | -1.65597200 | 3.41078600  |
| C | -2.18823600 | 3.22449300  | 2.31910200  |
| H | -2.87240900 | 2.84775300  | 3.08160000  |
| H | -1.64978000 | 4.07745500  | 2.75437200  |
| H | -2.77081800 | 3.60957700  | 1.47471800  |
| O | -1.72642200 | 0.95275000  | 4.00048300  |
| H | -0.25217700 | 0.42170400  | 2.65847000  |

|    |             |             |             |
|----|-------------|-------------|-------------|
| C  | -0.73696500 | 1.46163400  | 4.89298200  |
| H  | -1.18888200 | 1.46855600  | 5.88712700  |
| H  | 0.15433500  | 0.81947700  | 4.90292400  |
| H  | -0.43405000 | 2.48434200  | 4.63091600  |
| O  | 1.18255400  | -0.76664600 | 0.64597000  |
| C  | 2.18145200  | -1.42096300 | 0.27684700  |
| C  | 2.06083900  | -2.70710500 | -0.38619500 |
| C  | 3.55865100  | -0.94385800 | 0.48164100  |
| C  | 3.17691500  | -3.44144200 | -0.80120100 |
| C  | 4.65002200  | -1.65850900 | 0.07769000  |
| C  | 4.53716000  | -2.96646000 | -0.59649400 |
| O  | 5.53291200  | -3.61570000 | -0.96301500 |
| Cl | 3.70875800  | 0.59721000  | 1.27898200  |
| Cl | 6.27240600  | -1.08257900 | 0.32510500  |
| C  | 0.73811300  | -3.19165200 | -0.59435700 |
| C  | 3.03083900  | -4.69995000 | -1.45067500 |
| N  | -0.34648000 | -3.58542700 | -0.75889600 |
| N  | 2.90342700  | -5.72897500 | -1.98233800 |
| O  | -6.58328600 | -2.95139300 | -2.06750700 |
| C  | -7.87473000 | -2.47479900 | -2.46038400 |
| H  | -7.78977200 | -1.56682700 | -3.06690500 |
| H  | -8.31271100 | -3.27498000 | -3.05686900 |
| H  | -8.50413600 | -2.28010700 | -1.58551300 |
| O  | 1.06221800  | 6.08600500  | -2.92951700 |
| C  | 2.00366000  | 5.82132100  | -3.98076000 |
| H  | 2.98625000  | 5.57340800  | -3.56774300 |
| H  | 1.64932700  | 5.00955200  | -4.62344900 |
| H  | 2.06543800  | 6.74619400  | -4.55307500 |

### para-OMe-Ph (2\_A)

E(B3LYP/BS1) = -2564.744513 au

H(B3LYP/BS1) = -2564.207454 au

G(B3LYP/BS1) = -2564.321363 au

E(M06-2X/BS2//B3LYP/BS1) = -2564.604151 au

|   |             |             |             |
|---|-------------|-------------|-------------|
| C | -0.48888000 | -0.67363600 | 2.07044000  |
| C | -1.91198400 | -0.70054500 | 1.49861900  |
| C | 0.33073400  | 0.59230400  | 1.82602900  |
| C | -2.43015200 | 0.38340800  | 0.88039500  |
| H | -1.79039300 | 1.25625000  | 0.80049500  |
| C | 0.65987100  | 0.92769200  | 0.55713400  |
| H | 0.28236600  | 0.28789500  | -0.23768400 |
| C | -3.77006800 | 0.61215900  | 0.32289100  |
| C | -4.68539700 | -0.38439100 | -0.06196300 |
| C | -4.16759000 | 1.95432700  | 0.12091200  |
| C | -5.93605600 | -0.06977100 | -0.59689300 |
| H | -4.42324500 | -1.43079700 | 0.02538900  |
| C | -5.40868900 | 2.28346200  | -0.39944800 |
| H | -3.48044500 | 2.75344900  | 0.38845400  |
| C | -6.31066300 | 1.26950500  | -0.76185700 |
| H | -6.60220400 | -0.87465000 | -0.88518000 |
| H | -5.70139000 | 3.31946800  | -0.54087100 |
| C | 1.42000300  | 2.07791100  | 0.05085200  |

|    |             |             |             |
|----|-------------|-------------|-------------|
| C  | 2.42268700  | 2.75311700  | 0.76844000  |
| C  | 1.16513100  | 2.51551300  | -1.26824300 |
| C  | 3.11933600  | 3.83081100  | 0.21944100  |
| H  | 2.70002700  | 2.41774000  | 1.76092300  |
| C  | 1.83971500  | 3.59127500  | -1.82272100 |
| H  | 0.41316600  | 2.00070100  | -1.86136800 |
| C  | 2.82363400  | 4.26481600  | -1.07925600 |
| H  | 3.89186400  | 4.31310000  | 0.80678700  |
| H  | 1.62822000  | 3.92571500  | -2.83377500 |
| C  | -2.69956600 | -1.95347900 | 1.81674300  |
| H  | -3.70218700 | -1.69874300 | 2.17789900  |
| H  | -2.81994500 | -2.59766800 | 0.94020000  |
| H  | -2.19882500 | -2.53854700 | 2.58813300  |
| C  | 0.59924400  | 1.47536800  | 3.02324100  |
| H  | -0.17981200 | 1.34015000  | 3.77738400  |
| H  | 1.56132800  | 1.25855700  | 3.50391500  |
| H  | 0.61447500  | 2.52718000  | 2.72376300  |
| O  | -0.66177000 | -0.98685700 | 3.41333000  |
| H  | 3.57124000  | -2.91725000 | -3.36524100 |
| C  | 0.42049200  | -1.48315700 | 4.21057000  |
| H  | 0.79805300  | -2.42465500 | 3.80580800  |
| H  | 1.24105900  | -0.76877800 | 4.29593900  |
| H  | -0.01574000 | -1.65525300 | 5.19654600  |
| O  | 3.96365500  | -2.53098300 | -2.56080300 |
| C  | 3.02767500  | -2.39233300 | -1.60676100 |
| C  | 3.42401400  | -1.85237300 | -0.37556800 |
| C  | 1.68185100  | -2.76786900 | -1.77008900 |
| C  | 2.48321200  | -1.67769800 | 0.67062800  |
| C  | 0.75177100  | -2.58500700 | -0.74320000 |
| C  | 1.12407000  | -2.01959200 | 0.50438800  |
| O  | 0.22666400  | -1.94431400 | 1.50090900  |
| Cl | 1.22788300  | -3.47072800 | -3.29954400 |
| Cl | -0.88969900 | -3.08146400 | -0.98444900 |
| C  | 4.79325100  | -1.48943000 | -0.19587300 |
| C  | 2.96574400  | -1.16170700 | 1.91212400  |
| N  | 5.90873000  | -1.19378400 | -0.04958500 |
| N  | 3.42930600  | -0.75370500 | 2.89813300  |
| O  | 3.43438800  | 5.30602600  | -1.70824000 |
| O  | -7.50464400 | 1.68706800  | -1.26685000 |
| C  | -8.45584100 | 0.70021500  | -1.65970200 |
| H  | -8.75295000 | 0.07212700  | -0.81135800 |
| H  | -9.32350300 | 1.25183200  | -2.02421300 |
| H  | -8.06382600 | 0.06502500  | -2.46306800 |
| C  | 4.45082500  | 6.01964600  | -1.00689800 |
| H  | 4.79053400  | 6.80001600  | -1.68914600 |
| H  | 4.05670200  | 6.47994700  | -0.09306200 |
| H  | 5.29344800  | 5.36611400  | -0.75164400 |

**para-NH<sub>2</sub>-Ph (TS\_A)**

E(B3LYP/BS1) = -2446.379242 au

H(B3LYP/BS1) = -2445.883208 au

G(B3LYP/BS1) = -2445.989909 au

E(M06-2X/BS2//B3LYP/BS1) = -2446.233806 au

|    |             |             |             |
|----|-------------|-------------|-------------|
| C  | -1.04933200 | 2.12124800  | -0.83055300 |
| C  | -2.36660900 | 1.63365700  | -0.30227600 |
| C  | -0.12002900 | 1.24445000  | -1.54758200 |
| C  | -2.97996700 | 0.56402100  | -0.88029200 |
| H  | -2.50070100 | 0.15265000  | -1.76733100 |
| C  | 0.09232900  | -0.03809000 | -1.03758600 |
| H  | -0.59574400 | -0.33607900 | -0.25403300 |
| C  | -4.23077200 | -0.09304100 | -0.52651500 |
| C  | -4.77080800 | -0.14214500 | 0.77892400  |
| C  | -4.94205200 | -0.77806800 | -1.53864300 |
| C  | -5.95937000 | -0.80366500 | 1.04794500  |
| H  | -4.23230900 | 0.30970900  | 1.60408500  |
| C  | -6.13625800 | -1.43147400 | -1.28426100 |
| H  | -4.54539200 | -0.78044300 | -2.55120600 |
| C  | -6.67592000 | -1.45264900 | 0.02013700  |
| H  | -6.34132500 | -0.83560300 | 2.06527500  |
| H  | -6.66126000 | -1.94054200 | -2.08866400 |
| C  | 1.02271500  | -1.06451100 | -1.38847900 |
| C  | 2.19409300  | -0.90605100 | -2.18730100 |
| C  | 0.80311200  | -2.36196800 | -0.83290400 |
| C  | 3.06065100  | -1.95109900 | -2.41213900 |
| H  | 2.44357100  | 0.05987000  | -2.60505200 |
| C  | 1.65432100  | -3.41753500 | -1.06159400 |
| H  | -0.07941000 | -2.52244100 | -0.22000000 |
| C  | 2.81613400  | -3.23662600 | -1.85556700 |
| H  | 3.95368800  | -1.79598000 | -3.01087600 |
| H  | 1.45024300  | -4.39153900 | -0.62674000 |
| C  | -2.95473500 | 2.46716200  | 0.81063700  |
| H  | -4.04725400 | 2.43562900  | 0.80166800  |
| H  | -2.61361900 | 2.12412000  | 1.79555600  |
| H  | -2.64215400 | 3.50971800  | 0.70015400  |
| C  | 0.60035900  | 1.79754100  | -2.74809600 |
| H  | 0.01699700  | 2.61008500  | -3.18631400 |
| H  | 1.59376400  | 2.19518400  | -2.50301700 |
| H  | 0.73633500  | 1.01737300  | -3.50218400 |
| O  | -1.20419900 | 3.42659000  | -1.32665700 |
| H  | -0.35136100 | 2.23523200  | 0.28178200  |
| C  | -0.20001800 | 4.40566300  | -1.03225500 |
| H  | -0.54872400 | 5.33075600  | -1.49570400 |
| H  | -0.10106000 | 4.54904700  | 0.04795700  |
| H  | 0.77547100  | 4.13927600  | -1.44951000 |
| O  | 0.36792500  | 2.29246300  | 1.38437300  |
| C  | 1.22178900  | 1.32065400  | 1.41510300  |
| C  | 0.89074700  | 0.07025000  | 2.04136500  |
| C  | 2.55987200  | 1.44370600  | 0.87145400  |
| C  | 1.76553600  | -1.01234600 | 2.02894200  |
| C  | 3.43331300  | 0.38721000  | 0.85009600  |
| C  | 3.07838000  | -0.94131800 | 1.37659500  |
| O  | 3.83314000  | -1.91882600 | 1.30373200  |
| Cl | 3.01432200  | 3.00704000  | 0.25592700  |

|    |             |             |             |
|----|-------------|-------------|-------------|
| Cl | 5.04271500  | 0.53314000  | 0.21247700  |
| C  | -0.38673200 | -0.02673600 | 2.67736900  |
| C  | 1.43101600  | -2.24566200 | 2.65724200  |
| N  | -1.42215100 | -0.11133400 | 3.20185600  |
| N  | 1.15968500  | -3.25574700 | 3.16982200  |
| N  | -7.83556800 | -2.15130500 | 0.29666500  |
| H  | -8.32889400 | -1.89404500 | 1.14231300  |
| H  | -8.45821300 | -2.32414100 | -0.48250800 |
| N  | 3.65675900  | -4.26816900 | -2.10544100 |
| H  | 4.54980800  | -4.10409800 | -2.54845100 |
| H  | 3.56132500  | -5.13821200 | -1.60055100 |

**para-NH<sub>2</sub>-Ph (TS\_B)**

E(B3LYP/BS1) = -2446.363605 au

H(B3LYP/BS1) = -2445.866991 au

G(B3LYP/BS1) = -2445.975649 au

E(M06-2X/BS2//B3LYP/BS1) = -2446.219545 au

|   |             |             |             |
|---|-------------|-------------|-------------|
| C | 0.10274100  | -0.85805400 | -2.07377500 |
| C | 1.43686400  | -0.27609500 | -1.99083900 |
| C | -1.10489700 | 0.06373900  | -2.03609900 |
| C | 1.60187500  | 0.77144200  | -1.09064400 |
| H | 0.68202300  | 1.11607300  | -0.62420200 |
| C | -1.87826500 | 0.23315600  | -0.94540600 |
| H | -1.57395400 | -0.27889300 | -0.03679800 |
| C | 2.75016800  | 1.52450400  | -0.69069600 |
| C | 4.10343000  | 1.27213900  | -1.05756300 |
| C | 2.52202700  | 2.63230300  | 0.17744500  |
| C | 5.13181900  | 2.07338300  | -0.61185500 |
| H | 4.35271800  | 0.42820400  | -1.68375300 |
| C | 3.54039100  | 3.44288900  | 0.62427600  |
| H | 1.50398400  | 2.84589400  | 0.49152900  |
| C | 4.87935900  | 3.18337100  | 0.23554300  |
| H | 6.15474900  | 1.85430400  | -0.90511000 |
| H | 3.32718700  | 4.28176700  | 1.28070500  |
| C | -3.07870500 | 1.06486200  | -0.77462900 |
| C | -4.02830100 | 1.30274100  | -1.78785900 |
| C | -3.33984800 | 1.62921900  | 0.49073100  |
| C | -5.15528300 | 2.08431600  | -1.56086800 |
| H | -3.90643200 | 0.84420400  | -2.76321600 |
| C | -4.45576000 | 2.42040000  | 0.72589400  |
| H | -2.64054000 | 1.45573700  | 1.30494800  |
| C | -5.38767600 | 2.66844100  | -0.30119300 |
| H | -5.87430900 | 2.23818200  | -2.36192600 |
| H | -4.61941900 | 2.84829300  | 1.71200100  |
| C | 2.54882800  | -0.88007700 | -2.81015100 |
| H | 3.09757600  | -0.08884900 | -3.33284300 |
| H | 3.26940400  | -1.42500400 | -2.18863100 |
| H | 2.15237000  | -1.57004500 | -3.55383900 |
| C | -1.30079800 | 0.78479900  | -3.35778900 |
| H | -0.33190600 | 1.02562800  | -3.80720400 |
| H | -1.85298100 | 0.18270100  | -4.09050700 |
| H | -1.85271300 | 1.71655100  | -3.21072500 |



|    |             |             |             |
|----|-------------|-------------|-------------|
| O  | 0.01728200  | -1.86274300 | -3.01238500 |
| H  | 0.13435800  | -1.58879700 | -0.84946700 |
| C  | -1.21089700 | -2.60309900 | -3.09382500 |
| H  | -2.03936600 | -1.97208200 | -3.42623900 |
| H  | -1.02517300 | -3.38693900 | -3.82849800 |
| H  | -1.45857700 | -3.05507200 | -2.12850200 |
| O  | -1.62144700 | -3.41831500 | 0.54631700  |
| C  | -0.79961900 | -2.60462000 | 0.93236100  |
| C  | 0.52447100  | -2.42312100 | 0.21886100  |
| C  | -1.05448000 | -1.70029900 | 2.08459200  |
| C  | 1.58241300  | -1.72833200 | 0.90665200  |
| C  | -0.09620800 | -0.86764700 | 2.55959400  |
| C  | 1.31402900  | -0.84544200 | 2.01855200  |
| O  | 2.16797900  | -0.13658100 | 2.55408000  |
| Cl | -2.64088900 | -1.81127000 | 2.77566800  |
| Cl | -0.38948200 | 0.20193800  | 3.88211400  |
| C  | 0.90640700  | -3.59883000 | -0.53922700 |
| C  | 2.93613300  | -1.89413600 | 0.53467700  |
| N  | 1.22513500  | -4.53189900 | -1.15338700 |
| N  | 4.05584100  | -2.04468800 | 0.23706600  |
| N  | -6.54124800 | 3.40449200  | -0.05585000 |
| N  | 5.89313800  | 3.98948900  | 0.64237300  |
| H  | -6.48357900 | 4.05893000  | 0.71533600  |
| H  | -6.97000400 | 3.82629300  | -0.87103900 |
| H  | 6.85304200  | 3.71085300  | 0.49516500  |
| H  | 5.73599100  | 4.67836300  | 1.36447600  |

**para-NH<sub>2</sub>-Ph (TS\_D)**

E(B3LYP/BS1) = -2446.358995 au

H(B3LYP/BS1) = -2445.864849 au

G(B3LYP/BS1) = -2445.977134 au

E(M06-2X/BS2//B3LYP/BS1) = -2446.207808 au

|   |             |             |             |
|---|-------------|-------------|-------------|
| C | -0.79968200 | 0.92873000  | 2.39102500  |
| C | -2.10899800 | 0.52003000  | 1.86653300  |
| C | 0.06180300  | 1.93429800  | 1.71569500  |
| C | -2.60743400 | 1.07854800  | 0.70344800  |
| H | -2.07306400 | 1.95004700  | 0.33313200  |
| C | 0.44239600  | 1.70426500  | 0.42007800  |
| H | 0.07354500  | 0.77621100  | -0.01456600 |
| C | -3.77235600 | 0.73736100  | -0.07502900 |
| C | -4.42562400 | -0.52347100 | -0.07821800 |
| C | -4.29229100 | 1.72319700  | -0.95666400 |
| C | -5.52990600 | -0.76591200 | -0.87418700 |
| H | -4.03312400 | -1.33917800 | 0.51577200  |
| C | -5.40171700 | 1.49592000  | -1.74661500 |
| H | -3.80292700 | 2.69300400  | -1.00222300 |
| C | -6.05397100 | 0.24087400  | -1.71851900 |
| H | -5.99823100 | -1.74681300 | -0.86405600 |
| H | -5.77824000 | 2.27872900  | -2.39990800 |
| C | 1.23801200  | 2.47400400  | -0.52120100 |
| C | 1.97629900  | 3.64980900  | -0.24074500 |
| C | 1.30019500  | 1.99761700  | -1.85480700 |

|    |             |             |             |
|----|-------------|-------------|-------------|
| C  | 2.70747800  | 4.30178700  | -1.22193400 |
| H  | 1.99871900  | 4.05959700  | 0.75971300  |
| C  | 2.02227200  | 2.64357000  | -2.84291500 |
| H  | 0.75344000  | 1.09390800  | -2.11341600 |
| C  | 2.74503000  | 3.81858300  | -2.54678000 |
| H  | 3.26796400  | 5.19791500  | -0.96703100 |
| H  | 2.03907700  | 2.24432000  | -3.85394600 |
| C  | -2.85650100 | -0.52683600 | 2.66184100  |
| H  | -3.93704700 | -0.38589500 | 2.57671600  |
| H  | -2.61990500 | -1.53898500 | 2.31193500  |
| H  | -2.57740200 | -0.46803200 | 3.71470600  |
| C  | 0.45264700  | 3.15851200  | 2.51302200  |
| H  | -0.10625500 | 3.19983000  | 3.44950200  |
| H  | 1.52205500  | 3.18136700  | 2.75811700  |
| H  | 0.23150300  | 4.06833200  | 1.94332700  |
| O  | -0.79039200 | 0.96354700  | 3.79242100  |
| H  | -0.14948300 | -0.33711600 | 2.04609600  |
| C  | 0.41501200  | 0.58421400  | 4.46193700  |
| H  | 0.23416100  | 0.75912700  | 5.52462700  |
| H  | 0.63643500  | -0.47507700 | 4.29670000  |
| H  | 1.27221300  | 1.18517000  | 4.14046600  |
| O  | 0.16713300  | -1.48388900 | 1.90411800  |
| C  | 0.92843000  | -1.88624400 | 0.92956800  |
| C  | 0.38713400  | -2.78971200 | -0.04196400 |
| C  | 2.31827600  | -1.51713400 | 0.80467200  |
| C  | 1.15711900  | -3.26949200 | -1.10195200 |
| C  | 3.08979900  | -1.98029700 | -0.23506500 |
| C  | 2.55426200  | -2.88046000 | -1.26829700 |
| O  | 3.24206100  | -3.29329000 | -2.21615300 |
| Cl | 2.98502900  | -0.50235800 | 2.04448600  |
| Cl | 4.75596900  | -1.55443200 | -0.39725300 |
| C  | -0.98006900 | -3.17656800 | 0.10745800  |
| C  | 0.61177200  | -4.15261700 | -2.07607000 |
| N  | -2.09200500 | -3.49977000 | 0.22127900  |
| N  | 0.16258200  | -4.87446100 | -2.87156100 |
| N  | 3.51805400  | 4.44007900  | -3.50892400 |
| N  | -7.18422700 | 0.01685200  | -2.46412100 |
| H  | -7.46286800 | -0.94173700 | -2.62754700 |
| H  | -7.37340200 | 0.63940900  | -3.23865000 |
| H  | 3.27498900  | 4.25528400  | -4.47409300 |
| H  | 3.75332000  | 5.41073000  | -3.34401500 |

**para-NH<sub>2</sub>-Ph (2\_D)**

E(B3LYP/BS1) = -2446.396866 au

H(B3LYP/BS1) = -2445.89612 au

G(B3LYP/BS1) = -2446.015414 au

E(M06-2X/BS2//B3LYP/BS1) = -2446.234186 au

|   |             |             |            |
|---|-------------|-------------|------------|
| C | -1.75877900 | 0.85301600  | 2.25297200 |
| C | -2.38855000 | -0.41319900 | 1.68628100 |
| C | -1.89491700 | 2.08195000  | 1.36555300 |
| C | -3.27338900 | -0.34380100 | 0.65352800 |
| H | -3.57502200 | 0.65331200  | 0.33762900 |

|    |             |             |             |
|----|-------------|-------------|-------------|
| C  | -0.89346000 | 2.28705400  | 0.44962200  |
| H  | -0.10720000 | 1.53210300  | 0.45383400  |
| C  | -3.92677500 | -1.40856900 | -0.08289700 |
| C  | -3.39086300 | -2.70938600 | -0.26733100 |
| C  | -5.16585500 | -1.12683700 | -0.71535500 |
| C  | -4.06539200 | -3.67062200 | -0.99433000 |
| H  | -2.40953400 | -2.95448700 | 0.12158800  |
| C  | -5.85706600 | -2.08053800 | -1.43362600 |
| H  | -5.58875300 | -0.13013800 | -0.61825700 |
| C  | -5.32337600 | -3.38570200 | -1.58315100 |
| H  | -3.62490300 | -4.65427800 | -1.13298900 |
| H  | -6.81120900 | -1.83760000 | -1.89321900 |
| C  | -0.69896400 | 3.30881500  | -0.54397100 |
| C  | -1.48556200 | 4.48465900  | -0.71129300 |
| C  | 0.39688400  | 3.13939400  | -1.44103800 |
| C  | -1.21076900 | 5.40221800  | -1.70031800 |
| H  | -2.31284300 | 4.68726700  | -0.04546500 |
| C  | 0.68104600  | 4.04266500  | -2.43756800 |
| H  | 1.02292200  | 2.25850000  | -1.33159200 |
| C  | -0.12387400 | 5.20357000  | -2.59606400 |
| H  | -1.82347000 | 6.29333000  | -1.80241600 |
| H  | 1.51997300  | 3.87831900  | -3.10753800 |
| C  | -1.92427200 | -1.67024300 | 2.37007000  |
| H  | -2.65709800 | -2.47742200 | 2.29845200  |
| H  | -0.97917700 | -2.02165500 | 1.93639700  |
| H  | -1.74220300 | -1.46163700 | 3.42932400  |
| C  | -3.10920600 | 2.94465100  | 1.57768800  |
| H  | -3.80176400 | 2.45902900  | 2.26781700  |
| H  | -2.83752800 | 3.91238800  | 2.02122200  |
| H  | -3.63306200 | 3.15574200  | 0.63875800  |
| O  | -2.29065900 | 1.05410900  | 3.56263200  |
| H  | -0.68296800 | 0.62703200  | 2.33903400  |
| C  | -1.44937800 | 1.83046000  | 4.40918200  |
| H  | -1.94376200 | 1.87999700  | 5.38219000  |
| H  | -0.46250100 | 1.36125200  | 4.52779800  |
| H  | -1.30971500 | 2.85146900  | 4.02803800  |
| O  | 1.08638800  | -0.54907300 | 0.87028300  |
| C  | 2.18372100  | -0.99376000 | 0.47300000  |
| C  | 2.31858700  | -2.31546900 | -0.11478100 |
| C  | 3.43150800  | -0.21657900 | 0.56462300  |
| C  | 3.54585300  | -2.80941800 | -0.57123100 |
| C  | 4.63042700  | -0.69789100 | 0.12278700  |
| C  | 4.77449600  | -2.03481200 | -0.48478700 |
| O  | 5.86752100  | -2.46756000 | -0.89208000 |
| Cl | 3.28153400  | 1.36463700  | 1.27907500  |
| Cl | 6.09616000  | 0.23192200  | 0.23890600  |
| C  | 1.13100400  | -3.09569500 | -0.20521400 |
| C  | 3.64846700  | -4.10617800 | -1.15008600 |
| N  | 0.15978800  | -3.73637300 | -0.27474500 |
| N  | 3.72423500  | -5.16820200 | -1.62369300 |
| N  | -6.00833500 | -4.34701500 | -2.26192600 |

|   |             |             |             |
|---|-------------|-------------|-------------|
| H | -6.81207400 | -4.09688200 | -2.82089600 |
| H | -5.55087100 | -5.21373700 | -2.50815700 |
| N | 0.13815900  | 6.10125700  | -3.57059300 |
| H | -0.42404900 | 6.93281700  | -3.68482700 |
| H | 0.91381700  | 5.97777800  | -4.20597200 |

**para-NH<sub>2</sub>-Ph (2\_A)**

E(B3LYP/BS1) = -2446.412822 au

H(B3LYP/BS1) = -2445.910273 au

G(B3LYP/BS1) = -2446.017046 au

E(M06-2X/BS2//B3LYP/BS1) = -2446.291813 au

|   |             |             |             |
|---|-------------|-------------|-------------|
| C | -0.60771800 | -0.37942200 | 2.05337100  |
| C | -1.99933900 | -0.56062600 | 1.44401400  |
| C | 0.12206700  | 0.93036700  | 1.76578500  |
| C | -2.56941100 | 0.40635100  | 0.69202100  |
| H | -1.96167700 | 1.27889700  | 0.47513500  |
| C | 0.48216300  | 1.22228700  | 0.49311500  |
| H | 0.19139600  | 0.51056900  | -0.27659600 |
| C | -3.90016200 | 0.47538200  | 0.07453600  |
| C | -5.04886100 | -0.22138900 | 0.50422400  |
| C | -4.06616700 | 1.34797100  | -1.02290100 |
| C | -6.27294600 | -0.07785800 | -0.13941100 |
| H | -5.00281000 | -0.86607700 | 1.37316600  |
| C | -5.27995500 | 1.49097100  | -1.68035800 |
| H | -3.20972700 | 1.91950200  | -1.37391200 |
| C | -6.41320700 | 0.77302600  | -1.25172100 |
| H | -7.13946800 | -0.62359400 | 0.22685300  |
| H | -5.36247700 | 2.16740400  | -2.52791300 |
| C | 1.17214600  | 2.39487400  | -0.05414200 |
| C | 2.05928400  | 3.22210900  | 0.66543100  |
| C | 0.97554000  | 2.70689000  | -1.41652000 |
| C | 2.68507400  | 4.31025500  | 0.06927600  |
| H | 2.29481800  | 2.99709000  | 1.69891700  |
| C | 1.58478800  | 3.79831800  | -2.01867000 |
| H | 0.31560300  | 2.07949200  | -2.01165300 |
| C | 2.45293000  | 4.62884600  | -1.28256800 |
| H | 3.37276600  | 4.91981100  | 0.65062600  |
| H | 1.40079800  | 4.01297500  | -3.06867600 |
| C | -2.68351400 | -1.84816500 | 1.84602100  |
| H | -3.31620800 | -1.70888300 | 2.73158200  |
| H | -3.31825500 | -2.22337500 | 1.03796500  |
| H | -1.94895300 | -2.61669600 | 2.08935300  |
| C | 0.27273100  | 1.89727100  | 2.91860400  |
| H | -0.50647600 | 1.72575200  | 3.66499300  |
| H | 1.24024200  | 1.80544100  | 3.42857900  |
| H | 0.19031400  | 2.92841500  | 2.56251600  |
| O | -0.80543400 | -0.63959500 | 3.40406700  |
| H | 3.57758800  | -2.65229200 | -3.25844400 |
| C | 0.29454400  | -0.98305500 | 4.25677600  |
| H | 0.71435900  | -1.95023600 | 3.97125400  |
| H | 1.08446000  | -0.23017400 | 4.24940500  |
| H | -0.13617300 | -1.04914700 | 5.25795400  |

|    |             |             |             |
|----|-------------|-------------|-------------|
| O  | 3.95292900  | -2.19247900 | -2.48506700 |
| C  | 3.02067600  | -2.06056800 | -1.52596000 |
| C  | 3.39649800  | -1.43087700 | -0.33104000 |
| C  | 1.69933900  | -2.52836700 | -1.65092000 |
| C  | 2.45667100  | -1.25861800 | 0.71563800  |
| C  | 0.77098200  | -2.35475000 | -0.62095900 |
| C  | 1.12157000  | -1.69653900 | 0.58667200  |
| O  | 0.24528400  | -1.61948600 | 1.59828000  |
| Cl | 1.27416000  | -3.33490400 | -3.13729400 |
| Cl | -0.83447800 | -2.97966300 | -0.80047000 |
| C  | 4.74240400  | -0.97618900 | -0.18838700 |
| C  | 2.90502300  | -0.64874600 | 1.92729800  |
| N  | 5.83885800  | -0.60582000 | -0.07091100 |
| N  | 3.33221200  | -0.16437100 | 2.89502600  |
| N  | 3.11939300  | 5.68442500  | -1.89347600 |
| N  | -7.65091700 | 0.95800100  | -1.86084600 |
| H  | -8.30565500 | 0.19275400  | -1.74956700 |
| H  | -7.61604300 | 1.27691000  | -2.82195500 |
| H  | 3.43871700  | 6.41740400  | -1.27136800 |
| H  | 2.67032800  | 6.06405000  | -2.71835800 |

**para-NMe<sub>2</sub>-Ph (TS\_A)**

E(B3LYP/BS1) = -2603.606008 au

H(B3LYP/BS1) = -2602.990086 au

G(B3LYP/BS1) = -2603.112138 au

E(M06-2X/BS2//B3LYP/BS1) = -2603.411289 au

|   |             |             |             |
|---|-------------|-------------|-------------|
| C | 0.77455600  | -2.39274800 | -1.16329600 |
| C | 2.12361700  | -1.97893000 | -0.66109500 |
| C | -0.19151900 | -1.42787400 | -1.70124900 |
| C | 2.69714200  | -0.82318100 | -1.10402200 |
| H | 2.16500000  | -0.29239600 | -1.89214400 |
| C | -0.36997700 | -0.22835500 | -1.01110000 |
| H | 0.35705200  | -0.03971400 | -0.22876400 |
| C | 3.95541600  | -0.20452200 | -0.72534500 |
| C | 4.58825300  | -0.35769300 | 0.53005500  |
| C | 4.58269300  | 0.67032500  | -1.64281200 |
| C | 5.77454300  | 0.28786600  | 0.83576300  |
| H | 4.11924600  | -0.95745100 | 1.30152200  |
| C | 5.77400500  | 1.31344600  | -1.36054000 |
| H | 4.11542400  | 0.83964800  | -2.61028100 |
| C | 6.41888500  | 1.13371100  | -0.10664900 |
| H | 6.20078600  | 0.14723600  | 1.82156700  |
| H | 6.20491800  | 1.96706100  | -2.10907100 |
| C | -1.31830700 | 0.82979200  | -1.16142700 |
| C | -2.52796800 | 0.78561800  | -1.91368700 |
| C | -1.08037100 | 2.03089900  | -0.42901200 |
| C | -3.41332600 | 1.83905800  | -1.92890400 |
| H | -2.79631000 | -0.10616200 | -2.46370400 |
| C | -1.94847100 | 3.09683000  | -0.44355800 |
| H | -0.16781400 | 2.11100400  | 0.15501500  |
| C | -3.16060300 | 3.03646700  | -1.19154900 |
| H | -4.32792200 | 1.73771400  | -2.49911000 |

|    |             |             |             |
|----|-------------|-------------|-------------|
| H  | -1.70428700 | 3.97868200  | 0.13432000  |
| C  | 2.78540500  | -2.96259800 | 0.27363000  |
| H  | 3.87463700  | -2.92754400 | 0.18750300  |
| H  | 2.52197700  | -2.76532000 | 1.32052900  |
| H  | 2.45693200  | -3.97916600 | 0.03849600  |
| C  | -0.98331200 | -1.81638900 | -2.92160600 |
| H  | -0.43905400 | -2.57326000 | -3.49024600 |
| H  | -1.96962400 | -2.23046500 | -2.67476400 |
| H  | -1.14489500 | -0.94545900 | -3.56299500 |
| O  | 0.88238600  | -3.62179100 | -1.83907800 |
| H  | 0.15386400  | -2.65315700 | -0.03719600 |
| C  | -0.10246500 | -4.63274600 | -1.59425400 |
| H  | 0.18251400  | -5.47820100 | -2.22391100 |
| H  | -0.09527200 | -4.93774000 | -0.54322600 |
| H  | -1.11093800 | -4.30580100 | -1.86460200 |
| O  | -0.49593600 | -2.87668800 | 1.09873600  |
| C  | -1.33157700 | -1.91718200 | 1.33677500  |
| C  | -0.93760800 | -0.77141200 | 2.10675300  |
| C  | -2.70719400 | -1.95262700 | 0.88237700  |
| C  | -1.79640800 | 0.30585800  | 2.31805200  |
| C  | -3.56575100 | -0.90206700 | 1.08351100  |
| C  | -3.15760200 | 0.33152600  | 1.77456400  |
| O  | -3.90840500 | 1.30662700  | 1.91316700  |
| Cl | -3.22628400 | -3.40385200 | 0.07144300  |
| Cl | -5.21845600 | -0.94648100 | 0.54721100  |
| C  | 0.38564700  | -0.76955300 | 2.64914500  |
| C  | -1.39280200 | 1.43734700  | 3.08194500  |
| N  | 1.45781200  | -0.76315800 | 3.10221900  |
| N  | -1.06407600 | 2.36594300  | 3.70388600  |
| N  | -4.03940700 | 4.07201000  | -1.20166900 |
| N  | 7.60353900  | 1.76011500  | 0.18553500  |
| C  | 8.20769700  | 1.61029000  | 1.50338100  |
| H  | 8.42884700  | 0.55873300  | 1.72462700  |
| H  | 9.14553000  | 2.16520500  | 1.53040500  |
| H  | 7.55636200  | 1.99799100  | 2.29850400  |
| C  | 8.21108800  | 2.66738000  | -0.77930700 |
| H  | 7.56473300  | 3.52922500  | -0.99463400 |
| H  | 9.15199700  | 3.04025500  | -0.37449600 |
| H  | 8.42794500  | 2.15683400  | -1.72585300 |
| C  | -5.29304200 | 3.97774800  | -1.94806500 |
| H  | -5.92957400 | 3.17168400  | -1.56264300 |
| H  | -5.83354700 | 4.91853000  | -1.85219800 |
| H  | -5.10606800 | 3.79814600  | -3.01248500 |
| C  | -3.79406900 | 5.25369300  | -0.37649500 |
| H  | -2.86189500 | 5.75202700  | -0.66589400 |
| H  | -4.61362000 | 5.95811500  | -0.51208700 |
| H  | -3.73524700 | 4.98999000  | 0.68642600  |

**para-NMe<sub>2</sub>-Ph (TS\_B)**

E(B3LYP/BS1) = -2603.589351 au

H(B3LYP/BS1) = -2602.972915 au

G(B3LYP/BS1) = -2603.095936 au

E(M06-2X/BS2//B3LYP/BS1) = -2603.396663 au

|    |             |             |             |
|----|-------------|-------------|-------------|
| C  | -0.07649400 | 1.50740900  | -1.98640100 |
| C  | -1.41690000 | 0.93534500  | -1.99499600 |
| C  | 1.12189900  | 0.57479000  | -2.01985100 |
| C  | -1.61062800 | -0.20804900 | -1.22524200 |
| H  | -0.70416300 | -0.61375000 | -0.78229600 |
| C  | 1.85367800  | 0.26505700  | -0.93034300 |
| H  | 1.51839700  | 0.66731400  | 0.02185900  |
| C  | -2.77289200 | -0.98644500 | -0.93644600 |
| C  | -4.11592000 | -0.68937600 | -1.30528400 |
| C  | -2.57915100 | -2.18236900 | -0.18574000 |
| C  | -5.16152400 | -1.52149200 | -0.97205400 |
| H  | -4.34707100 | 0.21541600  | -1.84824200 |
| C  | -3.61173700 | -3.02613400 | 0.15056400  |
| H  | -1.57151300 | -2.44097400 | 0.12871000  |
| C  | -4.95066800 | -2.72558900 | -0.23653600 |
| H  | -6.16209000 | -1.24038700 | -1.27509500 |
| H  | -3.39449500 | -3.92078500 | 0.71994700  |
| C  | 3.03741600  | -0.59600900 | -0.81594000 |
| C  | 4.01173400  | -0.75380200 | -1.82068100 |
| C  | 3.26842700  | -1.28054500 | 0.39392200  |
| C  | 5.12273100  | -1.56951600 | -1.64726100 |
| H  | 3.92887000  | -0.19683800 | -2.74784600 |
| C  | 4.36543500  | -2.10846400 | 0.58156500  |
| H  | 2.55972700  | -1.16751100 | 1.21100800  |
| C  | 5.32436400  | -2.29400000 | -0.44627000 |
| H  | 5.84671100  | -1.63079100 | -2.45074700 |
| H  | 4.48089100  | -2.60805400 | 1.53577000  |
| C  | -2.50761300 | 1.64125000  | -2.75955500 |
| H  | -3.04166800 | 0.92387100  | -3.39273700 |
| H  | -3.24468300 | 2.10355500  | -2.09225800 |
| H  | -2.09295300 | 2.41910500  | -3.39921300 |
| C  | 1.35678800  | 0.01118500  | -3.41005200 |
| H  | 0.40280100  | -0.14238200 | -3.92494400 |
| H  | 1.95886100  | 0.67571500  | -4.04277700 |
| H  | 1.87489400  | -0.94962800 | -3.35298300 |
| O  | 0.04009300  | 2.60450200  | -2.81379500 |
| H  | -0.12826500 | 2.10644600  | -0.69577000 |
| C  | 1.27446200  | 3.33754500  | -2.78343300 |
| H  | 2.10813100  | 2.73777600  | -3.15810400 |
| H  | 1.11468600  | 4.19633200  | -3.43600400 |
| H  | 1.49883000  | 3.68340100  | -1.76984800 |
| O  | 1.62750800  | 3.75533900  | 0.91208200  |
| C  | 0.78257200  | 2.92340600  | 1.19873800  |
| C  | -0.52825900 | 2.83925900  | 0.44631600  |
| C  | 0.99662600  | 1.90480000  | 2.25990400  |
| C  | -1.61288300 | 2.09848200  | 1.04006100  |
| C  | 0.01345400  | 1.04928300  | 2.63259800  |
| C  | -1.38483100 | 1.10733300  | 2.06502200  |
| O  | -2.26232100 | 0.36615100  | 2.51296200  |
| Cl | 2.57038400  | 1.91474000  | 2.98882100  |

|    |             |             |             |
|----|-------------|-------------|-------------|
| Cl | 0.25980600  | -0.15065400 | 3.84939600  |
| C  | -0.87604200 | 4.09173500  | -0.19591900 |
| C  | -2.95454800 | 2.32129900  | 0.65503700  |
| N  | -1.16898200 | 5.08772700  | -0.71731400 |
| N  | -4.06453900 | 2.51815700  | 0.34768200  |
| N  | -5.98416500 | -3.54867200 | 0.08577100  |
| N  | 6.40592600  | -3.13584000 | -0.28195100 |
| C  | 6.67879300  | -3.71348400 | 1.02660900  |
| H  | 5.83470900  | -4.32110800 | 1.37332600  |
| H  | 7.54915100  | -4.36675500 | 0.95247900  |
| H  | 6.88528300  | -2.94873900 | 1.79058100  |
| C  | 7.45655400  | -3.16704000 | -1.28951500 |
| H  | 8.19781400  | -3.91606300 | -1.00763600 |
| H  | 7.05367100  | -3.44913300 | -2.26922500 |
| H  | 7.96808800  | -2.19842700 | -1.39696500 |
| C  | -7.35118400 | -3.21362500 | -0.30887700 |
| H  | -8.02189000 | -4.00090100 | 0.03300200  |
| H  | -7.67572800 | -2.26645800 | 0.13839400  |
| H  | -7.44217800 | -3.13425400 | -1.39846600 |
| C  | -5.74571300 | -4.76972000 | 0.85281400  |
| H  | -6.69233500 | -5.28899100 | 0.99695400  |
| H  | -5.06116800 | -5.44362600 | 0.32441200  |
| H  | -5.32214500 | -4.54548800 | 1.83918700  |

#### para-NMe<sub>2</sub>-Ph (TS\_D)

E(B3LYP/BS1) = -2603.585108 au

H(B3LYP/BS1) = -2602.971353 au

G(B3LYP/BS1) = -2603.099752 au

E(M06-2X/BS2//B3LYP/BS1) = -2603.385776 au

|   |             |             |             |
|---|-------------|-------------|-------------|
| C | 0.45303300  | 0.76827500  | 2.77754600  |
| C | 1.81993200  | 0.68137800  | 2.24600300  |
| C | -0.55557300 | -0.30641700 | 2.60176600  |
| C | 2.24616800  | -0.45120600 | 1.57757700  |
| H | 1.58484000  | -1.31201200 | 1.64184100  |
| C | -0.86257800 | -0.71781900 | 1.33057500  |
| H | -0.32031300 | -0.20909500 | 0.53466500  |
| C | 3.46545100  | -0.70946100 | 0.85422800  |
| C | 4.32164800  | 0.27122200  | 0.28857100  |
| C | 3.83573300  | -2.06307100 | 0.63349300  |
| C | 5.46682200  | -0.06967900 | -0.40520600 |
| H | 4.06069300  | 1.31997700  | 0.35235600  |
| C | 4.98177900  | -2.42104600 | -0.04613100 |
| H | 3.19506600  | -2.84907700 | 1.02600500  |
| C | 5.84904400  | -1.42878100 | -0.58357300 |
| H | 6.06889700  | 0.72404100  | -0.83008300 |
| H | 5.21013900  | -3.47241500 | -0.17038300 |
| C | -1.76563000 | -1.73205500 | 0.81817100  |
| C | -2.70832100 | -2.48489600 | 1.55946300  |
| C | -1.72574700 | -1.99447300 | -0.57366600 |
| C | -3.52814300 | -3.42961500 | 0.96319600  |
| H | -2.82680700 | -2.32286300 | 2.62226000  |
| C | -2.53248000 | -2.93678900 | -1.18490800 |



|    |             |             |             |
|----|-------------|-------------|-------------|
| H  | -1.02822000 | -1.43294000 | -1.19110200 |
| C  | -3.46303800 | -3.69768300 | -0.42928100 |
| H  | -4.23537100 | -3.96308700 | 1.58681400  |
| H  | -2.44529800 | -3.08296900 | -2.25472200 |
| C  | 2.70728700  | 1.88456900  | 2.47518400  |
| H  | 3.75323600  | 1.58652300  | 2.58465200  |
| H  | 2.64455500  | 2.59181700  | 1.63905400  |
| H  | 2.39767300  | 2.41249800  | 3.37822900  |
| C  | -1.17936900 | -0.88499800 | 3.85256300  |
| H  | -0.65789500 | -0.52623200 | 4.74163400  |
| H  | -2.24052800 | -0.62546400 | 3.95722900  |
| H  | -1.11426900 | -1.97899000 | 3.83744000  |
| O  | 0.41826200  | 1.44017400  | 4.00871200  |
| H  | 0.01637100  | 1.77537800  | 1.77922500  |
| C  | -0.70840700 | 2.27785000  | 4.27926200  |
| H  | -0.57894100 | 2.63167400  | 5.30446000  |
| H  | -0.73331700 | 3.13310600  | 3.59633300  |
| H  | -1.65523800 | 1.73243000  | 4.20543300  |
| O  | -0.14554400 | 2.70447000  | 1.06986500  |
| C  | -0.81340800 | 2.59246800  | -0.04465800 |
| C  | -0.11808300 | 2.70800500  | -1.28967400 |
| C  | -2.24488400 | 2.41842200  | -0.08706200 |
| C  | -0.78757200 | 2.61561600  | -2.51198900 |
| C  | -2.91910900 | 2.32446800  | -1.28196900 |
| C  | -2.22996600 | 2.40370600  | -2.57924600 |
| O  | -2.83053400 | 2.30769700  | -3.66222800 |
| Cl | -3.08338900 | 2.37121500  | 1.43218400  |
| Cl | -4.63411500 | 2.12132500  | -1.35103400 |
| C  | 1.29346800  | 2.92370600  | -1.24158900 |
| C  | -0.09153200 | 2.71717300  | -3.74907700 |
| N  | 2.44235700  | 3.10621300  | -1.21613300 |
| N  | 0.48059800  | 2.79958500  | -4.75997700 |
| N  | -4.26487400 | -4.64419400 | -1.01814400 |
| N  | 6.99263400  | -1.76657400 | -1.25459400 |
| C  | 7.84880200  | -0.73021600 | -1.82203400 |
| H  | 8.20725000  | -0.04166900 | -1.04734700 |
| H  | 8.71523900  | -1.19954500 | -2.28711200 |
| H  | 7.32232900  | -0.14537300 | -2.58718400 |
| C  | 7.34270900  | -3.16861700 | -1.45466400 |
| H  | 6.58122500  | -3.69466000 | -2.04470000 |
| H  | 8.28982500  | -3.22633900 | -1.99035400 |
| H  | 7.45890900  | -3.69089300 | -0.49715600 |
| C  | -5.24815800 | -5.36863300 | -0.22442200 |
| H  | -5.99966800 | -4.69626800 | 0.21223600  |
| H  | -5.76374900 | -6.08584700 | -0.86336100 |
| H  | -4.77173100 | -5.92455200 | 0.59296500  |
| C  | -4.21705600 | -4.84926800 | -2.45958600 |
| H  | -3.21353500 | -5.14746800 | -2.78871100 |
| H  | -4.91047600 | -5.64590700 | -2.72981000 |
| H  | -4.50273100 | -3.94370100 | -3.01237500 |

**para-NMe<sub>2</sub>-Ph (2\_D)**

E(B3LYP/BS1) = -2603.626437 au  
H(B3LYP/BS1) = -2603.005632 au  
G(B3LYP/BS1) = -2603.138777 au  
E(M06-2X/BS2//B3LYP/BS1) = -2603.412358 au

|   |             |             |             |
|---|-------------|-------------|-------------|
| C | 0.57017300  | -1.01785400 | 2.74851500  |
| C | 1.87893400  | -0.52535900 | 2.14251000  |
| C | -0.04503600 | -2.23384700 | 2.07262400  |
| C | 2.53988200  | -1.26935100 | 1.21446300  |
| H | 2.15022200  | -2.26737100 | 1.02217000  |
| C | -0.96583000 | -1.99433700 | 1.09160700  |
| H | -1.14560600 | -0.94119800 | 0.87427400  |
| C | 3.72881300  | -0.94958500 | 0.44861500  |
| C | 4.12767900  | 0.36188300  | 0.08618200  |
| C | 4.53231600  | -2.01481500 | -0.03291100 |
| C | 5.26568400  | 0.59524400  | -0.65934100 |
| H | 3.50861300  | 1.21119300  | 0.34971800  |
| C | 5.67935200  | -1.80120600 | -0.76764400 |
| H | 4.24146600  | -3.03632200 | 0.19849700  |
| C | 6.09451900  | -0.47809100 | -1.09681600 |
| H | 5.51002100  | 1.61604600  | -0.92535500 |
| H | 6.26050500  | -2.65428400 | -1.09458000 |
| C | -1.72936900 | -2.89117300 | 0.25462600  |
| C | -1.85255900 | -4.29606700 | 0.41930700  |
| C | -2.45288600 | -2.31937300 | -0.82690600 |
| C | -2.61307000 | -5.06691500 | -0.43585000 |
| H | -1.36356100 | -4.79375100 | 1.24583400  |
| C | -3.21036600 | -3.07308200 | -1.69618400 |
| H | -2.39955600 | -1.24429800 | -0.97582800 |
| C | -3.31269200 | -4.48499800 | -1.53282400 |
| H | -2.67812800 | -6.13233500 | -0.25426900 |
| H | -3.73119700 | -2.57614600 | -2.50488300 |
| C | 2.29964600  | 0.82727200  | 2.65100700  |
| H | 3.37962200  | 0.98036900  | 2.58681800  |
| H | 1.80536700  | 1.62502900  | 2.08152000  |
| H | 1.99630000  | 0.93270300  | 3.69715500  |
| C | 0.42698900  | -3.58159800 | 2.55302700  |
| H | 1.31453100  | -3.47218600 | 3.18002800  |
| H | -0.33666500 | -4.07879800 | 3.16699400  |
| H | 0.66188100  | -4.25494700 | 1.72164200  |
| O | 0.79282900  | -1.22973300 | 4.14539000  |
| H | -0.13311500 | -0.17723500 | 2.62646200  |
| C | -0.39182000 | -1.15269400 | 4.92965600  |
| H | -0.09181000 | -1.31149300 | 5.96826800  |
| H | -0.86739700 | -0.16575300 | 4.83750600  |
| H | -1.12409600 | -1.92196200 | 4.64812000  |
| O | -0.70934900 | 1.49108300  | 0.74151300  |
| C | -1.27080500 | 2.50854000  | 0.28492500  |
| C | -0.52523800 | 3.60688600  | -0.30622700 |
| C | -2.73382800 | 2.68252100  | 0.30472700  |
| C | -1.15357900 | 4.74448900  | -0.82561700 |
| C | -3.34832300 | 3.79258300  | -0.19967400 |

|    |             |             |             |
|----|-------------|-------------|-------------|
| C  | -2.59896900 | 4.90893500  | -0.80750100 |
| O  | -3.16309700 | 5.91694800  | -1.26972700 |
| Cl | -3.63789100 | 1.37578600  | 1.01749900  |
| Cl | -5.07739100 | 3.98405100  | -0.16811000 |
| C  | 0.89199700  | 3.47354300  | -0.33248300 |
| C  | -0.39795100 | 5.80397300  | -1.40323100 |
| N  | 2.05266800  | 3.36750900  | -0.35068000 |
| N  | 0.22702200  | 6.66694100  | -1.87513000 |
| N  | 7.23193100  | -0.24848800 | -1.81499900 |
| N  | -4.05622300 | -5.24712600 | -2.38475500 |
| C  | -4.15580400 | -6.69240900 | -2.19322800 |
| C  | -4.77994200 | -4.62736500 | -3.49272200 |
| C  | 8.04539400  | -1.36431900 | -2.29212900 |
| C  | 7.63709200  | 1.11581900  | -2.14620900 |
| H  | -5.52126700 | -3.90587600 | -3.12921600 |
| H  | -4.09371400 | -4.10989400 | -4.17312300 |
| H  | -4.77625100 | -7.11341300 | -2.98305200 |
| H  | -3.16876000 | -7.16681200 | -2.24032200 |
| H  | 7.47426900  | -2.01281000 | -2.96717000 |
| H  | 8.90259900  | -0.97161900 | -2.83720800 |
| H  | 6.90101600  | 1.60489600  | -2.79582800 |
| H  | 7.75928500  | 1.72020300  | -1.24052800 |
| H  | 8.59183000  | 1.08587800  | -2.66944000 |
| H  | 8.41534600  | -1.96991800 | -1.45654200 |
| H  | -4.61434500 | -6.93531000 | -1.22720000 |
| H  | -5.30087500 | -5.40155500 | -4.05430000 |

**para-NMe<sub>2</sub>-Ph (2\_A)**

E(B3LYP/BS1) = -2603.636711 au

H(B3LYP/BS1) = -2603.014759 au

G(B3LYP/BS1) = -2603.13712 au

E(M06-2X/BS2//B3LYP/BS1) = -2603.466709 au

|   |             |             |             |
|---|-------------|-------------|-------------|
| C | -0.35268400 | -1.27815800 | 2.05622000  |
| C | -1.77829900 | -1.15165200 | 1.52110700  |
| C | 0.51753200  | -0.02594100 | 2.05423700  |
| C | -2.26254500 | 0.03242500  | 1.08343300  |
| H | -1.56434300 | 0.86283600  | 1.05383600  |
| C | 0.85255600  | 0.54542100  | 0.87169400  |
| H | 0.44211800  | 0.08932300  | -0.02683200 |
| C | -3.59887100 | 0.40203100  | 0.60498300  |
| C | -4.80475000 | -0.26894000 | 0.89526600  |
| C | -3.71274900 | 1.56220300  | -0.19038100 |
| C | -6.02920700 | 0.16891500  | 0.40577000  |
| H | -4.80367700 | -1.13803800 | 1.54154300  |
| C | -4.92359800 | 2.00836300  | -0.69835300 |
| H | -2.81261800 | 2.12549500  | -0.42789000 |
| C | -6.12988000 | 1.32109500  | -0.41234300 |
| H | -6.91841700 | -0.39018800 | 0.67167800  |
| H | -4.93266100 | 2.89871900  | -1.31569000 |
| C | 1.65183000  | 1.73774400  | 0.58216800  |
| C | 2.64857000  | 2.27808600  | 1.42046700  |
| C | 1.45924500  | 2.38633000  | -0.65573400 |

|    |             |             |             |
|----|-------------|-------------|-------------|
| C  | 3.37551100  | 3.40680600  | 1.06572000  |
| H  | 2.89719700  | 1.78812900  | 2.35460000  |
| C  | 2.16607700  | 3.52166700  | -1.02149600 |
| H  | 0.72477700  | 1.98602600  | -1.35156800 |
| C  | 3.14156000  | 4.08208100  | -0.15828300 |
| H  | 4.14198200  | 3.75899300  | 1.74543900  |
| H  | 1.96577900  | 3.96998300  | -1.98711500 |
| C  | -2.59278800 | -2.42143300 | 1.62977700  |
| H  | -3.17849200 | -2.44757700 | 2.55741600  |
| H  | -3.29083500 | -2.51175100 | 0.79228600  |
| H  | -1.94407900 | -3.29809200 | 1.62977800  |
| C  | 0.83751600  | 0.58904600  | 3.39811600  |
| H  | 0.08515300  | 0.30488900  | 4.13768600  |
| H  | 1.81493900  | 0.27741200  | 3.78842700  |
| H  | 0.85197800  | 1.68044200  | 3.32182600  |
| O  | -0.51864500 | -1.86152500 | 3.30562200  |
| H  | 3.30977500  | -2.52065600 | -3.94568000 |
| C  | 0.57155600  | -2.52141100 | 3.96202300  |
| H  | 0.86538000  | -3.41740500 | 3.41066900  |
| H  | 1.44092700  | -1.87425400 | 4.08890300  |
| H  | 0.18077800  | -2.80283400 | 4.94203700  |
| O  | 3.76882300  | -2.31521000 | -3.11056200 |
| C  | 2.89979500  | -2.34298800 | -2.08516200 |
| C  | 3.39599500  | -2.08278200 | -0.80023700 |
| C  | 1.52981400  | -2.63063200 | -2.22959200 |
| C  | 2.52835500  | -2.09499700 | 0.32055700  |
| C  | 0.67248400  | -2.63566700 | -1.12633100 |
| C  | 1.14717400  | -2.35012200 | 0.18112600  |
| O  | 0.32911000  | -2.44758100 | 1.23642700  |
| Cl | 0.95310100  | -2.98516400 | -3.83704600 |
| Cl | -1.00082000 | -3.02808300 | -1.34293900 |
| C  | 4.78959300  | -1.81430400 | -0.64423200 |
| C  | 3.09664600  | -1.86824100 | 1.61152900  |
| N  | 5.92492000  | -1.59538200 | -0.51623100 |
| N  | 3.62085000  | -1.69853700 | 2.63632500  |
| N  | 3.83401200  | 5.22671800  | -0.49643700 |
| N  | -7.34601700 | 1.76408500  | -0.89185700 |
| C  | -8.53918800 | 0.95359800  | -0.69649700 |
| H  | -8.74834200 | 0.80489600  | 0.36995600  |
| H  | -9.39546600 | 1.46839300  | -1.13405500 |
| H  | -8.45508700 | -0.03726500 | -1.16761100 |
| C  | -7.39061900 | 2.86532700  | -1.84256600 |
| H  | -6.85168900 | 2.63763600  | -2.77459900 |
| H  | -8.43064700 | 3.07840900  | -2.09282400 |
| H  | -6.95678900 | 3.77730700  | -1.41455300 |
| C  | 3.68805400  | 5.79236700  | -1.83011500 |
| H  | 4.27788000  | 6.70762200  | -1.89490900 |
| H  | 4.02895000  | 5.10548500  | -2.61953800 |
| H  | 2.64326700  | 6.05393700  | -2.03492000 |
| C  | 4.94852200  | 5.66840300  | 0.33023600  |
| H  | 5.76544600  | 4.93190100  | 0.36470300  |

H 5.34495300 6.60024100 -0.07518300  
H 4.62318200 5.86368500 1.35879200

**meta-CN-Ph (TS\_A)**

E(B3LYP/BS1) = -2704.619659 au

H(B3LYP/BS1) = -2704.158766 au

G(B3LYP/BS1) = -2704.279529 au

E(M06-2X/BS2//B3LYP/BS1) = -2704.462108 au

C 0.74087300 -2.17252900 -1.27322300  
C 2.08978300 -1.82611200 -0.70504000  
C -0.18706900 -1.14600800 -1.77949500  
C 2.69327000 -0.66527400 -1.06083900  
H 2.20339700 -0.04467100 -1.80640100  
C -0.36718800 -0.01916100 -1.00432300  
H 0.31569000 0.10657200 -0.17208200  
C 3.99065700 -0.14854700 -0.60295400  
C 4.44614900 -0.28805600 0.71850200  
C 4.78535300 0.56926800 -1.51282200  
C 5.68470300 0.24683200 1.10471100  
H 3.82592400 -0.77308000 1.46289400  
C 6.02482400 1.09516500 -1.12545800  
H 4.44095200 0.71182400 -2.53194300  
C 6.48858600 0.93407200 0.18705000  
H 7.44495300 1.34420200 0.48878500  
C -1.26253600 1.11836500 -1.19342300  
C -2.47208900 1.07451800 -1.91392500  
C -0.91266100 2.32810300 -0.55917600  
C -3.27942600 2.21478500 -2.02234600  
H -2.81333000 0.15557800 -2.36950100  
C -1.71762300 3.46708000 -0.67909600  
H 0.00286100 2.38525200 0.01990400  
C -2.90850600 3.42169300 -1.41537600  
H -3.53592500 4.30033200 -1.50556500  
C 2.70827900 -2.89067300 0.16823900  
H 3.79657100 -2.80778500 0.20034000  
H 2.32958200 -2.83006800 1.19549300  
H 2.45098400 -3.87992500 -0.21930200  
C -0.90695000 -1.40828400 -3.07694200  
H -0.31401000 -2.08247800 -3.69906100  
H -1.89273100 -1.86698100 -2.93431400  
H -1.05481200 -0.47259700 -3.62307400  
O 0.82536800 -3.37272800 -1.95459300  
H 0.04970900 -2.44457200 -0.12191500  
C -0.26569000 -4.31070300 -1.92139400  
H 0.08041400 -5.17185800 -2.49376700  
H -0.47438700 -4.60861300 -0.89063200  
H -1.17191700 -3.90961400 -2.38008800  
O -0.58016000 -2.64590000 0.92607500  
C -1.39453900 -1.69389000 1.24231500  
C -0.96338400 -0.64565800 2.14086600  
C -2.78535900 -1.69198500 0.82379800  
C -1.82805000 0.34082000 2.57210600

|    |             |             |             |
|----|-------------|-------------|-------------|
| C  | -3.65639100 | -0.72103400 | 1.23820100  |
| C  | -3.23848200 | 0.37973100  | 2.13152200  |
| O  | -4.00470600 | 1.26532000  | 2.50444400  |
| Cl | -3.29692500 | -3.00010600 | -0.19221000 |
| Cl | -5.32243200 | -0.71459900 | 0.77719500  |
| C  | 0.39529800  | -0.68604300 | 2.58997600  |
| C  | -1.41081800 | 1.36026000  | 3.47609500  |
| N  | 1.50131500  | -0.71659900 | 2.94714900  |
| N  | -1.07061200 | 2.19454400  | 4.21239200  |
| C  | -4.50870600 | 2.14146400  | -2.76014400 |
| C  | -1.32190900 | 4.68992400  | -0.04015600 |
| C  | 6.82394300  | 1.81072000  | -2.07876500 |
| C  | 6.13000300  | 0.09662200  | 2.46094700  |
| N  | -5.50226100 | 2.08033100  | -3.36056100 |
| N  | -0.99911300 | 5.68115600  | 0.47414300  |
| N  | 7.46969200  | 2.38953800  | -2.85337600 |
| N  | 6.49170200  | -0.02723300 | 3.55904000  |

**meta-CN-Ph (TS\_B)**

E(B3LYP/BS1) = -2704.65677 au

H(B3LYP/BS1) = -2704.189748 au

G(B3LYP/BS1) = -2704.319632 au

E(M06-2X/BS2//B3LYP/BS1) = -2704.49673 au

|   |             |             |             |
|---|-------------|-------------|-------------|
| C | 0.09253900  | 1.58994900  | 1.68898400  |
| C | 1.45228600  | 1.02955600  | 1.70922300  |
| C | -1.08878800 | 0.65746100  | 1.88852700  |
| C | 1.62446300  | -0.19085600 | 1.11046000  |
| H | 0.73955100  | -0.65936400 | 0.68815600  |
| C | -1.89681300 | 0.26613800  | 0.88855600  |
| H | -1.66796200 | 0.59134600  | -0.12052500 |
| C | 2.84094400  | -0.99083800 | 0.96372300  |
| C | 3.93835500  | -0.92677600 | 1.84088200  |
| C | 2.88609100  | -1.91676300 | -0.09599300 |
| C | 5.05997200  | -1.74293100 | 1.63799400  |
| H | 3.91718900  | -0.28012300 | 2.70763100  |
| C | 4.01442300  | -2.71961000 | -0.30222400 |
| H | 2.04670200  | -2.00160000 | -0.77587400 |
| C | 5.11408900  | -2.63711900 | 0.56124600  |
| H | 5.98487800  | -3.26317400 | 0.40723500  |
| C | -3.07573000 | -0.62051800 | 0.97106300  |
| C | -4.01387000 | -0.54291700 | 2.00995000  |
| C | -3.29586500 | -1.54530800 | -0.06167400 |
| C | -5.12783500 | -1.39712200 | 2.03262900  |
| H | -3.90486500 | 0.19748400  | 2.79295900  |
| C | -4.40632700 | -2.40060500 | -0.03473900 |
| H | -2.59689000 | -1.60927500 | -0.88904600 |
| C | -5.33080200 | -2.33734700 | 1.01604700  |
| H | -6.19111700 | -2.99576000 | 1.03549200  |
| C | 2.55691900  | 1.89531600  | 2.26148400  |
| H | 2.65675800  | 1.74160900  | 3.34413500  |
| H | 3.51531400  | 1.68120700  | 1.78733200  |
| H | 2.32860300  | 2.95208100  | 2.11624900  |

|    |             |             |             |
|----|-------------|-------------|-------------|
| C  | -1.20881200 | 0.21708200  | 3.33603000  |
| H  | -0.21845200 | 0.00632500  | 3.75112600  |
| H  | -1.66149700 | 0.99332000  | 3.96450900  |
| H  | -1.81382000 | -0.68767800 | 3.42383500  |
| O  | 0.00975100  | 2.78427800  | 2.32405400  |
| H  | 0.12019800  | 1.98166300  | 0.25230300  |
| C  | -1.23671100 | 3.51213900  | 2.29316600  |
| H  | -2.04543100 | 2.93515300  | 2.74624800  |
| H  | -1.04953800 | 4.41601200  | 2.87092200  |
| H  | -1.49319800 | 3.77260900  | 1.26247000  |
| O  | -1.63726000 | 3.43079500  | -1.45984700 |
| C  | -0.84642100 | 2.53254200  | -1.66629400 |
| C  | 0.50046300  | 2.49795600  | -0.93521300 |
| C  | -1.14101700 | 1.39270900  | -2.57184600 |
| C  | 1.53520800  | 1.66492400  | -1.48349300 |
| C  | -0.19778000 | 0.46687400  | -2.87162300 |
| C  | 1.22928200  | 0.56907600  | -2.38325800 |
| O  | 2.07240800  | -0.23279300 | -2.78080100 |
| Cl | -2.74620100 | 1.35468400  | -3.21509500 |
| Cl | -0.52541100 | -0.87379200 | -3.89828800 |
| C  | 0.90463800  | 3.82569400  | -0.49664100 |
| C  | 2.90430500  | 1.90294400  | -1.20633200 |
| N  | 1.23367000  | 4.87887000  | -0.13631200 |
| N  | 4.03319000  | 2.10749500  | -0.99352600 |
| C  | -4.60101100 | -3.34724800 | -1.09571900 |
| C  | -6.07357200 | -1.29636600 | 3.10721900  |
| C  | 4.03877300  | -3.64315100 | -1.40047100 |
| C  | 6.16356300  | -1.66845700 | 2.55262700  |
| N  | -6.83660200 | -1.21255800 | 3.98059200  |
| N  | -4.75724800 | -4.11429400 | -1.95544500 |
| N  | 4.05686400  | -4.39253200 | -2.28905600 |
| N  | 7.05612900  | -1.60752500 | 3.29508600  |

### meta-CN-Ph (TS\_D)

E(B3LYP/BS1) = -2704.604548 au

H(B3LYP/BS1) = -2704.14549 au

G(B3LYP/BS1) = -2704.271006 au

E(M06-2X/BS2//B3LYP/BS1) = -2704.438352 au

|   |             |             |             |
|---|-------------|-------------|-------------|
| C | 0.07663600  | -0.63899700 | 2.53940800  |
| C | 1.48121700  | -0.85945800 | 2.13745700  |
| C | -1.03461000 | -1.46358200 | 1.94418600  |
| C | 1.76296200  | -1.59598200 | 1.00567100  |
| H | 0.94986000  | -2.17069800 | 0.57281900  |
| C | -1.40736700 | -1.22211000 | 0.66340500  |
| H | -0.88368100 | -0.42850500 | 0.13489400  |
| C | 3.04279400  | -1.76487600 | 0.32818600  |
| C | 4.03104500  | -0.76282900 | 0.26402500  |
| C | 3.27184500  | -2.97553900 | -0.35559900 |
| C | 5.22676000  | -0.98926000 | -0.43009200 |
| H | 3.86087300  | 0.21065600  | 0.70739800  |
| C | 4.47352300  | -3.20051500 | -1.03657600 |
| H | 2.51247400  | -3.75030200 | -0.34417000 |

|    |             |             |             |
|----|-------------|-------------|-------------|
| C  | 5.46523800  | -2.21032300 | -1.07557200 |
| H  | 6.39387100  | -2.38045800 | -1.60717800 |
| C  | -2.40419500 | -1.91385100 | -0.16487300 |
| C  | -3.54953100 | -2.54699600 | 0.34574800  |
| C  | -2.21908900 | -1.90215900 | -1.55919000 |
| C  | -4.46135900 | -3.17779600 | -0.51417700 |
| H  | -3.76408100 | -2.52920400 | 1.40567600  |
| C  | -3.12605600 | -2.54060300 | -2.41434100 |
| H  | -1.35613300 | -1.39843600 | -1.98212400 |
| C  | -4.25594100 | -3.18931200 | -1.89882900 |
| H  | -4.96139300 | -3.67977900 | -2.55881100 |
| C  | 2.53198200  | -0.21585100 | 3.00351700  |
| H  | 3.52227200  | -0.62806400 | 2.80741000  |
| H  | 2.56375700  | 0.86726600  | 2.83692200  |
| H  | 2.28767000  | -0.37348000 | 4.05602700  |
| C  | -1.59001100 | -2.55122200 | 2.83552300  |
| H  | -0.85421700 | -2.83216600 | 3.59320100  |
| H  | -2.49648900 | -2.23865200 | 3.36816700  |
| H  | -1.84410600 | -3.43892400 | 2.24872300  |
| O  | -0.02643200 | -0.40174700 | 3.90072900  |
| H  | -0.00658200 | 0.56111500  | 2.01090000  |
| C  | -1.16684000 | 0.32575900  | 4.38053600  |
| H  | -1.12071700 | 0.26195500  | 5.46800800  |
| H  | -1.09665600 | 1.37057700  | 4.06367700  |
| H  | -2.10752100 | -0.10367000 | 4.02565200  |
| O  | 0.30750500  | 1.84716100  | 1.71421500  |
| C  | -0.11495100 | 2.57883600  | 0.74128400  |
| C  | 0.85927500  | 3.26111300  | -0.06666000 |
| C  | -1.50999300 | 2.79781200  | 0.43056300  |
| C  | 0.48504700  | 4.08396300  | -1.12759100 |
| C  | -1.89290900 | 3.60756100  | -0.61171500 |
| C  | -0.91748000 | 4.30078000  | -1.46847100 |
| O  | -1.25899500 | 5.02608700  | -2.41654200 |
| Cl | -2.68079300 | 2.03267200  | 1.46044000  |
| Cl | -3.55559100 | 3.88822300  | -0.98598000 |
| C  | 2.23317200  | 3.02653000  | 0.24503500  |
| C  | 1.45618900  | 4.73795800  | -1.93776100 |
| N  | 3.35063000  | 2.82108500  | 0.49695500  |
| N  | 2.25309400  | 5.27139600  | -2.59782100 |
| C  | 4.68899200  | -4.45070800 | -1.70784600 |
| C  | 6.21832500  | 0.04708600  | -0.49142600 |
| C  | -2.89901500 | -2.52570800 | -3.83137500 |
| C  | -5.62609700 | -3.81161100 | 0.03521300  |
| N  | -2.71259500 | -2.51399400 | -4.97894100 |
| N  | -6.56787000 | -4.32490500 | 0.48411800  |
| N  | 4.86147600  | -5.46453100 | -2.25006200 |
| N  | 7.02460100  | 0.88307600  | -0.54085100 |

**meta-CN-Ph (2\_D)**

E(B3LYP/BS1) = -2704.61722 au

H(B3LYP/BS1) = -2704.151557 au

G(B3LYP/BS1) = -2704.279425 au



E(M06-2X/BS2//B3LYP/BS1) = -2704.442688 au

|    |             |             |             |
|----|-------------|-------------|-------------|
| C  | -2.08743900 | 1.37656100  | 2.50509800  |
| C  | -2.35734900 | 0.07529400  | 1.75540200  |
| C  | -1.86544200 | 2.34516800  | 1.33804300  |
| C  | -3.57702100 | -0.03402500 | 1.12394200  |
| H  | -4.27931100 | 0.77571600  | 1.29850600  |
| C  | -0.60645500 | 2.31682100  | 0.75315200  |
| H  | 0.10005000  | 1.60739700  | 1.17788000  |
| C  | -4.12715400 | -1.12962700 | 0.34238400  |
| C  | -3.35855300 | -2.02320100 | -0.43450400 |
| C  | -5.53303100 | -1.25885000 | 0.32825800  |
| C  | -3.99002700 | -3.03535900 | -1.16772100 |
| H  | -2.28328200 | -1.91661400 | -0.52128000 |
| C  | -6.15310700 | -2.28273000 | -0.39274200 |
| H  | -6.14093000 | -0.56331400 | 0.89706600  |
| C  | -5.38486600 | -3.18308200 | -1.14472600 |
| H  | -5.86236500 | -3.97309100 | -1.71227400 |
| C  | -0.04062600 | 3.09426500  | -0.32553700 |
| C  | -0.70386700 | 4.11030600  | -1.05315400 |
| C  | 1.30579800  | 2.80063200  | -0.66048000 |
| C  | -0.04198700 | 4.79563800  | -2.07502200 |
| H  | -1.72614800 | 4.37881400  | -0.83738900 |
| C  | 1.95777300  | 3.49213300  | -1.68305200 |
| H  | 1.82344600  | 2.01550100  | -0.11759600 |
| C  | 1.29065200  | 4.49619900  | -2.40044300 |
| H  | 1.79554400  | 5.03417100  | -3.19420800 |
| C  | -1.29326500 | -0.97169800 | 1.83451200  |
| H  | -1.65344200 | -1.95451000 | 1.52965100  |
| H  | -0.41612100 | -0.72655800 | 1.22091000  |
| H  | -0.93889900 | -1.03530600 | 2.87065400  |
| C  | -3.01173600 | 3.21562500  | 0.92264900  |
| H  | -3.88645100 | 3.02485900  | 1.54457000  |
| H  | -2.73929300 | 4.27050100  | 1.05951000  |
| H  | -3.28218100 | 3.07632200  | -0.12892400 |
| O  | -3.16877400 | 1.70724300  | 3.33556500  |
| H  | -1.16410700 | 1.27287700  | 3.08888100  |
| C  | -2.86468000 | 2.72246800  | 4.29764800  |
| H  | -3.76378700 | 2.84765300  | 4.90275700  |
| H  | -2.03015400 | 2.41229000  | 4.93905800  |
| H  | -2.61532100 | 3.67745800  | 3.81820800  |
| O  | 1.76730600  | -0.00804200 | 0.76474400  |
| C  | 2.66497700  | -0.84420900 | 0.50591900  |
| C  | 2.42412700  | -2.00121300 | -0.33440000 |
| C  | 4.03071800  | -0.71454200 | 1.03179800  |
| C  | 3.42297300  | -2.93818500 | -0.61829200 |
| C  | 5.00933300  | -1.62764500 | 0.75853900  |
| C  | 4.77425400  | -2.81076200 | -0.09182000 |
| O  | 5.66650900  | -3.63974400 | -0.34120800 |
| Cl | 4.32192200  | 0.67667300  | 2.03682100  |
| Cl | 6.61876200  | -1.47098200 | 1.39308800  |
| C  | 1.10834300  | -2.13573200 | -0.86080600 |

|   |             |             |             |
|---|-------------|-------------|-------------|
| C | 3.16117500  | -4.06796500 | -1.44389200 |
| N | 0.02502900  | -2.22794400 | -1.27964000 |
| N | 2.93855100  | -4.99057700 | -2.11966400 |
| C | 3.32088300  | 3.17603000  | -2.00468500 |
| C | -0.73409500 | 5.82195300  | -2.80210900 |
| C | -7.58271300 | -2.40746300 | -0.37216000 |
| C | -3.21009700 | -3.93760700 | -1.96763100 |
| N | -2.59896900 | -4.68027000 | -2.62008800 |
| N | -8.74067100 | -2.50700700 | -0.35360300 |
| N | 4.42462400  | 2.92352500  | -2.26658600 |
| N | -1.29630500 | 6.65259600  | -3.38931100 |

**meta-CN-Ph (2\_A)**

E(B3LYP/BS1) = -2704.671256 au

H(B3LYP/BS1) = -2704.203673 au

G(B3LYP/BS1) = -2704.323101 au

E(M06-2X/BS2//B3LYP/BS1) = -2704.538256 au

|   |             |             |             |
|---|-------------|-------------|-------------|
| C | -0.30983300 | -0.57061800 | 2.12541700  |
| C | -1.76782600 | -0.67043800 | 1.62583400  |
| C | 0.44213700  | 0.71021600  | 1.73508300  |
| C | -2.32199400 | 0.32441900  | 0.90562900  |
| H | -1.72762800 | 1.20837800  | 0.70202100  |
| C | 0.74343900  | 0.93212400  | 0.43827900  |
| H | 0.40446800  | 0.21087600  | -0.30034600 |
| C | -3.69684500 | 0.41040100  | 0.37929000  |
| C | -4.42245300 | -0.69251400 | -0.09692100 |
| C | -4.29663600 | 1.67874700  | 0.30057400  |
| C | -5.72256000 | -0.53298500 | -0.60270900 |
| H | -3.97635900 | -1.67869600 | -0.10628800 |
| C | -5.59702300 | 1.83593200  | -0.19804800 |
| H | -3.74895400 | 2.55255900  | 0.63852600  |
| C | -6.32618200 | 0.72886200  | -0.65130200 |
| H | -7.33028900 | 0.84839800  | -1.04036100 |
| C | 1.44151800  | 2.08702800  | -0.15537300 |
| C | 2.48806900  | 2.76972100  | 0.48363300  |
| C | 1.07389900  | 2.49481200  | -1.44840700 |
| C | 3.12084400  | 3.85583500  | -0.14131300 |
| H | 2.84277400  | 2.44453800  | 1.45361700  |
| C | 1.70316900  | 3.58295100  | -2.06830800 |
| H | 0.28594200  | 1.96624100  | -1.97517000 |
| C | 2.73058900  | 4.27834800  | -1.41743400 |
| H | 3.22015700  | 5.11802900  | -1.89613800 |
| C | -2.51946400 | -1.88697400 | 2.11614400  |
| H | -3.58908900 | -1.67947900 | 2.20442600  |
| H | -2.39385000 | -2.74291200 | 1.44643700  |
| H | -2.14656400 | -2.18355700 | 3.09744100  |
| C | 0.66916300  | 1.71536000  | 2.83938900  |
| H | -0.13679300 | 1.65399400  | 3.57427700  |
| H | 1.60953100  | 1.54034400  | 3.37527400  |
| H | 0.69982000  | 2.73232500  | 2.44043800  |
| O | -0.42365500 | -0.74239000 | 3.50027000  |
| H | 3.66775400  | -3.32560600 | -3.13960100 |

|    |             |             |             |
|----|-------------|-------------|-------------|
| C  | 0.68977100  | -1.16759000 | 4.29811500  |
| H  | 1.07253200  | -2.12849600 | 3.94784000  |
| H  | 1.49820200  | -0.43441100 | 4.31224800  |
| H  | 0.28218900  | -1.27901600 | 5.30430100  |
| O  | 4.06640400  | -2.84553600 | -2.39035400 |
| C  | 3.14395300  | -2.60051800 | -1.44746500 |
| C  | 3.55583800  | -1.91845800 | -0.29366300 |
| C  | 1.79683900  | -2.99389600 | -1.54827200 |
| C  | 2.63088000  | -1.62843300 | 0.74009700  |
| C  | 0.88158400  | -2.69787200 | -0.53358300 |
| C  | 1.27406100  | -1.99610400 | 0.63362500  |
| O  | 0.38895000  | -1.83607000 | 1.64251100  |
| Cl | 1.32175600  | -3.86191300 | -2.98090600 |
| Cl | -0.76136400 | -3.21914500 | -0.69538900 |
| C  | 4.92508300  | -1.52947400 | -0.17945400 |
| C  | 3.12570800  | -0.95326500 | 1.89750800  |
| N  | 6.04002900  | -1.21182900 | -0.08644600 |
| N  | 3.58833600  | -0.40275800 | 2.81188700  |
| C  | -6.43748300 | -1.67959800 | -1.08630700 |
| C  | -6.18503000 | 3.14393100  | -0.24992900 |
| C  | 1.29497300  | 3.98513900  | -3.38403400 |
| C  | 4.18896900  | 4.53640100  | 0.53386300  |
| N  | 5.05257400  | 5.08843100  | 1.08303000  |
| N  | 0.96184500  | 4.30897900  | -4.45002700 |
| N  | -6.65956900 | 4.20482500  | -0.29032000 |
| N  | -7.01421800 | -2.61086000 | -1.47685000 |

**meta-OMe-Ph (TS\_A)**

E(B3LYP/BS1) = -2793.747087 au

H(B3LYP/BS1) = -2793.146251 au

G(B3LYP/BS1) = -2793.271286 au

E(M06-2X/BS2//B3LYP/BS1) = -2793.572843 au

|   |             |             |             |
|---|-------------|-------------|-------------|
| C | 0.47043500  | -2.41701800 | -0.89314200 |
| C | 1.84430300  | -2.05586200 | -0.39954200 |
| C | -0.42711000 | -1.43223500 | -1.51009100 |
| C | 2.50367100  | -1.00512000 | -0.95058400 |
| H | 2.01687900  | -0.49310900 | -1.77755000 |
| C | -0.52886700 | -0.19196300 | -0.89579900 |
| H | 0.20457200  | 0.00265800  | -0.12146400 |
| C | 3.83860400  | -0.48553600 | -0.62811200 |
| C | 4.36698200  | -0.49262600 | 0.67316700  |
| C | 4.58615500  | 0.08676900  | -1.67204000 |
| C | 5.63536700  | 0.04576900  | 0.91454500  |
| H | 3.79503700  | -0.86235500 | 1.51514700  |
| C | 5.85798800  | 0.60825600  | -1.42457700 |
| H | 4.19381200  | 0.12059800  | -2.68346900 |
| C | 6.39686700  | 0.59136600  | -0.12897800 |
| H | 7.37747600  | 1.00275900  | 0.06338200  |
| C | -1.39024000 | 0.94308500  | -1.16575500 |
| C | -2.61197100 | 0.86338900  | -1.87212600 |
| C | -0.97777400 | 2.18157800  | -0.61559700 |
| C | -3.38814000 | 2.01439500  | -2.03601200 |

|    |             |             |             |
|----|-------------|-------------|-------------|
| H  | -2.96506200 | -0.08405000 | -2.24639800 |
| C  | -1.75563200 | 3.32776400  | -0.80587500 |
| H  | -0.04117800 | 2.22986500  | -0.07417000 |
| C  | -2.96149500 | 3.24036400  | -1.50931500 |
| H  | -3.57182700 | 4.12632000  | -1.64631900 |
| C  | 2.42020700  | -3.00032600 | 0.62772300  |
| H  | 3.51187700  | -2.99921500 | 0.60738800  |
| H  | 2.09968800  | -2.72953700 | 1.64122700  |
| H  | 2.07066800  | -4.01831000 | 0.43277900  |
| C  | -1.21614800 | -1.84673700 | -2.72405400 |
| H  | -0.68411000 | -2.63827300 | -3.25667700 |
| H  | -2.21481600 | -2.22671400 | -2.47497400 |
| H  | -1.34790000 | -0.99560700 | -3.39705800 |
| O  | 0.50418000  | -3.69610900 | -1.44489000 |
| H  | -0.20255700 | -2.53081700 | 0.26619800  |
| C  | -0.58322900 | -4.60306600 | -1.20857800 |
| H  | -0.31703100 | -5.51902300 | -1.73840100 |
| H  | -0.68216400 | -4.81035900 | -0.13908700 |
| H  | -1.53277200 | -4.22408700 | -1.59472400 |
| O  | -0.86197000 | -2.57351800 | 1.35740300  |
| C  | -1.63714700 | -1.54962300 | 1.49851900  |
| C  | -1.17521000 | -0.37776200 | 2.20199700  |
| C  | -3.01869300 | -1.55352900 | 1.05109900  |
| C  | -1.98081800 | 0.73554500  | 2.37107300  |
| C  | -3.83014700 | -0.46290500 | 1.21159300  |
| C  | -3.35706500 | 0.78406900  | 1.84428000  |
| O  | -4.06136700 | 1.78846700  | 1.95562200  |
| Cl | -3.60025700 | -3.01989700 | 0.32507100  |
| Cl | -5.48794400 | -0.46096700 | 0.70782300  |
| C  | 0.15322300  | -0.41185000 | 2.73320300  |
| C  | -1.52321300 | 1.88657200  | 3.07426900  |
| N  | 1.23051900  | -0.43503800 | 3.17097600  |
| N  | -1.14672700 | 2.82972000  | 3.64380900  |
| O  | 6.50767900  | 1.12249100  | -2.50773200 |
| O  | 6.05270700  | 0.00220500  | 2.21190100  |
| O  | -4.57904800 | 2.05057000  | -2.68894800 |
| O  | -1.43533000 | 4.56564800  | -0.34894800 |
| C  | 7.80542100  | 1.68265400  | -2.32476400 |
| H  | 8.12210400  | 2.02514700  | -3.31091300 |
| H  | 7.78037900  | 2.53473600  | -1.63480100 |
| H  | 8.51633900  | 0.93415200  | -1.95450900 |
| C  | 7.32661800  | 0.54980200  | 2.54075800  |
| H  | 7.37633400  | 1.61929100  | 2.30304200  |
| H  | 7.43906500  | 0.41280100  | 3.61714000  |
| H  | 8.13586400  | 0.02255000  | 2.02115000  |
| C  | -0.22149700 | 4.73172100  | 0.38630600  |
| H  | -0.23982000 | 4.15518000  | 1.31781700  |
| H  | 0.64917100  | 4.44237000  | -0.21370500 |
| H  | -0.16361100 | 5.79564400  | 0.61899800  |
| C  | -5.07998500 | 0.84501400  | -3.26614700 |
| H  | -5.27040100 | 0.08612000  | -2.49848800 |

H -6.01953600 1.11777700 -3.74798700  
H -4.38717500 0.44565000 -4.01621300

**meta-OMe-Ph (TS\_B)**

E(B3LYP/BS1) = -2793.733821 au

H(B3LYP/BS1) = -2793.132117 au

G(B3LYP/BS1) = -2793.258568 au

E(M06-2X/BS2//B3LYP/BS1) = -2793.561601 au

C 0.19660500 1.73705800 -1.66688300  
C -1.18558600 1.26011600 -1.80780100  
C 1.33362100 0.73897100 -1.80531300  
C -1.48022900 0.06674300 -1.18820000  
H -0.62972000 -0.45885600 -0.76069900  
C 2.03385700 0.26363300 -0.76017200  
H 1.72924600 0.57269100 0.23495600  
C -2.72616200 -0.67680600 -1.06840700  
C -4.00978000 -0.14657300 -1.30211400  
C -2.60311600 -2.02278100 -0.66392200  
C -5.13626200 -0.95933400 -1.14889400  
H -4.16879900 0.89149100 -1.55153000  
C -3.73340000 -2.82985600 -0.52911700  
H -1.62811600 -2.45401200 -0.46297500  
C -5.01154000 -2.30535300 -0.77250200  
H -5.88885200 -2.92672600 -0.66232300  
C 3.16168100 -0.69118000 -0.76171100  
C 4.18208400 -0.63967300 -1.72489600  
C 3.21499500 -1.63791600 0.27556200  
C 5.24058800 -1.55710400 -1.65760800  
H 4.16623200 0.13013300 -2.48411200  
C 4.27301600 -2.55406000 0.32418900  
H 2.42728300 -1.65526000 1.01889800  
C 5.28294900 -2.51496700 -0.64182500  
H 6.10555100 -3.22035700 -0.59541100  
C -2.17221800 2.12557800 -2.54985500  
H -2.86331600 1.50050800 -3.12137000  
H -2.77039900 2.74489800 -1.87044800  
H -1.65360600 2.79392900 -3.23786100  
C 1.53439700 0.32617000 -3.25258300  
H 0.56546900 0.15590200 -3.73362100  
H 2.05139300 1.09656300 -3.83760100  
H 2.11901900 -0.59346800 -3.31547500  
O 0.40091600 2.93972500 -2.27696800  
H 0.11407200 2.11455300 -0.26392200  
C 1.69395000 3.56371700 -2.15745000  
H 2.46857000 2.97067500 -2.64879600  
H 1.59025400 4.52809000 -2.65365100  
H 1.95226400 3.71351800 -1.10525400  
O 1.89794000 3.32268500 1.62849900  
C 0.98349400 2.53039400 1.74894400  
C -0.29044100 2.67454000 0.92078900  
C 1.05765200 1.35241400 2.65273500  
C -1.46158200 1.96809100 1.36281500

|    |             |             |             |
|----|-------------|-------------|-------------|
| C  | -0.01450100 | 0.55046600  | 2.85898400  |
| C  | -1.37545100 | 0.83572400  | 2.26399200  |
| O  | -2.34303600 | 0.15334400  | 2.59240400  |
| Cl | 2.58842200  | 1.10806100  | 3.42448200  |
| Cl | 0.05933300  | -0.83028000 | 3.88616800  |
| C  | -0.49303200 | 4.04297600  | 0.47433200  |
| C  | -2.75763900 | 2.38920600  | 0.98156100  |
| N  | -0.66503100 | 5.13233300  | 0.11158900  |
| N  | -3.82352500 | 2.75574900  | 0.67712400  |
| O  | 4.41075600  | -3.52011500 | 1.27624000  |
| O  | 6.28310300  | -1.58971600 | -2.53637200 |
| O  | -6.33054500 | -0.35096200 | -1.38755800 |
| O  | -3.50047900 | -4.11694100 | -0.15157900 |
| C  | 3.41892800  | -3.61417100 | 2.29601500  |
| H  | 3.36488400  | -2.69300900 | 2.88831300  |
| H  | 2.43091900  | -3.83379300 | 1.87389400  |
| H  | 3.73060400  | -4.43985600 | 2.93727300  |
| C  | 6.30032100  | -0.64953300 | -3.60740800 |
| H  | 5.42080700  | -0.76167000 | -4.25284600 |
| H  | 6.35038200  | 0.38102800  | -3.23586300 |
| H  | 7.20135700  | -0.87064800 | -4.18134100 |
| C  | -7.53086400 | -1.10382000 | -1.22595500 |
| H  | -8.34458700 | -0.41397500 | -1.45301700 |
| H  | -7.56827700 | -1.95124400 | -1.92086000 |
| H  | -7.63862000 | -1.46807400 | -0.19736500 |
| C  | -4.61357100 | -4.99008800 | 0.03029900  |
| H  | -5.28522500 | -4.62265000 | 0.81521200  |
| H  | -5.17603800 | -5.12066500 | -0.90190000 |
| H  | -4.19051400 | -5.94819600 | 0.33471000  |

### meta-OMe-Ph (TS\_D)

E(B3LYP/BS1) = -2793.730791 au

H(B3LYP/BS1) = -2793.131718 au

G(B3LYP/BS1) = -2793.262341 au

E(M06-2X/BS2//B3LYP/BS1) = -2793.547519 au

|   |             |             |             |
|---|-------------|-------------|-------------|
| C | 0.49049100  | -0.09483000 | 2.68936500  |
| C | 1.84720600  | -0.26534100 | 2.14146700  |
| C | -0.64153900 | -0.98395100 | 2.28327400  |
| C | 2.08632400  | -1.20472600 | 1.15646000  |
| H | 1.28723100  | -1.91685800 | 0.97265900  |
| C | -1.03123600 | -0.97451200 | 0.97748300  |
| H | -0.48632300 | -0.29861700 | 0.32065400  |
| C | 3.27784100  | -1.44684700 | 0.36274700  |
| C | 4.24567300  | -0.45948700 | 0.07375000  |
| C | 3.42001700  | -2.74730300 | -0.17703500 |
| C | 5.34594300  | -0.78623300 | -0.72433000 |
| H | 4.10656800  | 0.55285600  | 0.42203800  |
| C | 4.53274100  | -3.06228500 | -0.95908600 |
| H | 2.66161300  | -3.48961100 | 0.03941600  |
| C | 5.49661000  | -2.08399100 | -1.23078800 |
| H | 6.35610800  | -2.32698600 | -1.84605200 |

|    |             |             |             |
|----|-------------|-------------|-------------|
| C  | -2.04336400 | -1.76112700 | 0.26810600  |
| C  | -3.12551500 | -2.41356200 | 0.88560300  |
| C  | -1.91787200 | -1.83058500 | -1.13276600 |
| C  | -4.04516900 | -3.12960600 | 0.11288300  |
| H  | -3.30347100 | -2.35194800 | 1.94971000  |
| C  | -2.83316400 | -2.55920700 | -1.89492600 |
| H  | -1.10190100 | -1.32737500 | -1.64157000 |
| C  | -3.90738200 | -3.21887700 | -1.27976700 |
| H  | -4.62092900 | -3.77704300 | -1.86879600 |
| C  | 2.91876500  | 0.63534500  | 2.70897700  |
| H  | 3.90298300  | 0.16908800  | 2.63367000  |
| H  | 2.95239600  | 1.59204100  | 2.17383000  |
| H  | 2.70855300  | 0.85294700  | 3.75682600  |
| C  | -1.23441800 | -1.86336800 | 3.36022500  |
| H  | -0.55583900 | -1.92958500 | 4.21347700  |
| H  | -2.19495200 | -1.48629600 | 3.73283100  |
| H  | -1.41277600 | -2.87080000 | 2.97137300  |
| O  | 0.52399400  | 0.26079300  | 4.03721600  |
| H  | 0.24827900  | 1.10365300  | 2.02845200  |
| C  | -0.53872100 | 1.07070500  | 4.55259800  |
| H  | -0.36211800 | 1.14125900  | 5.62718100  |
| H  | -0.50850700 | 2.06943100  | 4.10649200  |
| H  | -1.52142700 | 0.62316400  | 4.37617600  |
| O  | 0.35208100  | 2.28446600  | 1.57681300  |
| C  | -0.28513500 | 2.77806200  | 0.56504400  |
| C  | 0.47796200  | 3.38610200  | -0.48868700 |
| C  | -1.72548500 | 2.80779700  | 0.44980800  |
| C  | -0.13569000 | 3.95109500  | -1.60573600 |
| C  | -2.34382900 | 3.35988900  | -0.64688100 |
| C  | -1.58753100 | 3.96073200  | -1.75657600 |
| O  | -2.14109700 | 4.45284000  | -2.75306800 |
| Cl | -2.64360000 | 2.16616400  | 1.77544700  |
| Cl | -4.06406100 | 3.40991100  | -0.79556900 |
| C  | 1.90035300  | 3.37147000  | -0.35830300 |
| C  | 0.62714000  | 4.53422800  | -2.65699400 |
| N  | 3.05964100  | 3.36501500  | -0.25933900 |
| N  | 1.25379600  | 5.01071600  | -3.51468500 |
| O  | 4.77179800  | -4.28531400 | -1.50784300 |
| O  | 6.32717100  | 0.08790500  | -1.07523600 |
| O  | -5.06189000 | -3.71353200 | 0.80952900  |
| O  | -2.60573600 | -2.57135800 | -3.23885700 |
| C  | 3.82651600  | -5.32801500 | -1.27658200 |
| H  | 4.21658900  | -6.20238800 | -1.79909100 |
| H  | 3.73425900  | -5.55288300 | -0.20735500 |
| H  | 2.84079800  | -5.07047100 | -1.68197900 |
| C  | 6.27338800  | 1.41706700  | -0.55507000 |
| H  | 6.31258100  | 1.41376900  | 0.54088700  |
| H  | 7.15617700  | 1.92246800  | -0.94895500 |
| H  | 5.37073800  | 1.94326400  | -0.88417900 |
| C  | -6.05030900 | -4.44890900 | 0.09266100  |
| H  | -5.60988100 | -5.30418400 | -0.43389200 |

|   |             |             |             |
|---|-------------|-------------|-------------|
| H | -6.75341800 | -4.81052100 | 0.84424800  |
| H | -6.58097900 | -3.81206100 | -0.62530300 |
| C | -3.51116900 | -3.28177400 | -4.08001500 |
| H | -3.13647900 | -3.15039900 | -5.09601900 |
| H | -3.53051100 | -4.35061100 | -3.83521000 |
| H | -4.52638200 | -2.87285500 | -4.01115300 |

**meta-OMe-Ph (2\_D)**

E(B3LYP/BS1) = -2793.753652 au

H(B3LYP/BS1) = -2793.148711 au

G(B3LYP/BS1) = -2793.285528 au

E(M06-2X/BS2//B3LYP/BS1) = -2793.558947 au

|   |             |             |             |
|---|-------------|-------------|-------------|
| C | -1.11085900 | 0.55210400  | 2.65517000  |
| C | -1.82466200 | -0.61111100 | 1.97427100  |
| C | -1.21277400 | 1.85015300  | 1.86605800  |
| C | -2.85076000 | -0.36507800 | 1.11086800  |
| H | -3.17896500 | 0.66783500  | 1.01710900  |
| C | -0.31744100 | 1.97821400  | 0.82227900  |
| H | 0.36554900  | 1.13911100  | 0.69874000  |
| C | -3.64027800 | -1.30335500 | 0.32192500  |
| C | -3.11909500 | -2.50808200 | -0.17880500 |
| C | -4.97391900 | -0.93219600 | 0.01736700  |
| C | -3.92621100 | -3.35163400 | -0.95549400 |
| H | -2.08454800 | -2.78943900 | -0.02658700 |
| C | -5.76897700 | -1.78500300 | -0.73977600 |
| H | -5.35874500 | 0.00651000  | 0.39640300  |
| C | -5.25050600 | -3.00170200 | -1.23026200 |
| H | -5.90265700 | -3.62975400 | -1.82417200 |
| C | -0.13478100 | 3.02158100  | -0.15494200 |
| C | -0.78764500 | 4.27925400  | -0.15911000 |
| C | 0.79673100  | 2.71759900  | -1.18247600 |
| C | -0.50790300 | 5.18012600  | -1.17857100 |
| H | -1.47305400 | 4.54695300  | 0.62744600  |
| C | 1.06292500  | 3.62993200  | -2.21029900 |
| H | 1.30948600  | 1.76196400  | -1.18327500 |
| C | 0.41133900  | 4.86306300  | -2.21202500 |
| H | 0.58342400  | 5.60808200  | -2.97867600 |
| C | -1.30074600 | -1.95926400 | 2.37570500  |
| H | -2.04208700 | -2.74991900 | 2.24583000  |
| H | -0.41169600 | -2.21501300 | 1.78497800  |
| H | -0.99707000 | -1.93071000 | 3.42788200  |
| C | -2.26329600 | 2.83551600  | 2.27621900  |
| H | -2.91179300 | 2.40263000  | 3.03970600  |
| H | -1.80505500 | 3.73710800  | 2.70640700  |
| H | -2.87078500 | 3.16081600  | 1.42448400  |
| O | -1.59037500 | 0.64707900  | 3.98599800  |
| H | -0.04440300 | 0.26982500  | 2.67169400  |
| C | -0.67443300 | 1.26500300  | 4.88992900  |
| H | -1.14125400 | 1.22921300  | 5.87631600  |
| H | 0.27929600  | 0.72130200  | 4.91804800  |
| H | -0.47934500 | 2.31251800  | 4.62419800  |
| O | 1.51143500  | -0.75519000 | 0.69931800  |



|    |             |             |             |
|----|-------------|-------------|-------------|
| C  | 2.61912900  | -1.25726300 | 0.40724300  |
| C  | 2.73464000  | -2.57453800 | -0.19172800 |
| C  | 3.89169900  | -0.55836700 | 0.64474600  |
| C  | 3.97095500  | -3.13841600 | -0.52370500 |
| C  | 5.10041600  | -1.10675100 | 0.32290400  |
| C  | 5.22786600  | -2.44280800 | -0.29014800 |
| O  | 6.33012700  | -2.93850700 | -0.58466800 |
| Cl | 3.76003900  | 1.01998300  | 1.36906200  |
| Cl | 6.59769700  | -0.27040200 | 0.61059800  |
| C  | 1.51571700  | -3.27224600 | -0.42765600 |
| C  | 4.05627700  | -4.43172700 | -1.11301800 |
| N  | 0.51470500  | -3.83916100 | -0.61469800 |
| N  | 4.11847800  | -5.49061000 | -1.59532300 |
| O  | 1.95948300  | 3.22930300  | -3.14295700 |
| O  | -1.05601600 | 6.41006800  | -1.29367700 |
| O  | -7.06428800 | -1.54617300 | -1.07628200 |
| O  | -3.32883900 | -4.48675000 | -1.40328300 |
| C  | 2.27893800  | 4.12480900  | -4.21025100 |
| H  | 2.71927500  | 5.05307800  | -3.82865800 |
| H  | 3.00986300  | 3.59975100  | -4.82534200 |
| H  | 1.39207000  | 4.35600800  | -4.81128700 |
| C  | -2.00354600 | 6.83586800  | -0.31075500 |
| H  | -1.54721200 | 6.87142200  | 0.68463800  |
| H  | -2.30782200 | 7.83834700  | -0.61140200 |
| H  | -2.87618800 | 6.17345600  | -0.29527700 |
| C  | -7.66761600 | -0.33304400 | -0.62849900 |
| H  | -7.14408300 | 0.54237700  | -1.03029500 |
| H  | -8.68971800 | -0.35277000 | -1.00823300 |
| H  | -7.68419600 | -0.27902600 | 0.46632300  |
| C  | -4.08614700 | -5.38259800 | -2.21597800 |
| H  | -4.42028700 | -4.89591700 | -3.13980000 |
| H  | -3.40989200 | -6.20235800 | -2.46059300 |
| H  | -4.95434000 | -5.77475200 | -1.67336600 |

**meta-OMe-Ph (2\_A)**

E(B3LYP/BS1) = -2793.789956 au

H(B3LYP/BS1) = -2793.182581 au

G(B3LYP/BS1) = -2793.308373 au

E(M06-2X/BS2//B3LYP/BS1) = -2793.638101 au

|   |             |             |             |
|---|-------------|-------------|-------------|
| C | -0.25189100 | -1.01635400 | 2.13270100  |
| C | -1.70081800 | -1.00054500 | 1.61424200  |
| C | 0.56595000  | 0.25915600  | 1.91062900  |
| C | -2.21824800 | 0.10593100  | 1.04218900  |
| H | -1.58168500 | 0.98151500  | 0.97072900  |
| C | 0.86601800  | 0.63697900  | 0.64882000  |
| H | 0.47442200  | 0.02944700  | -0.16343800 |
| C | -3.58151800 | 0.33622200  | 0.52721700  |
| C | -4.38105400 | -0.66686500 | -0.04180600 |
| C | -4.07325000 | 1.65176900  | 0.57536500  |
| C | -5.65549400 | -0.35756500 | -0.53002400 |
| H | -4.02602800 | -1.68352800 | -0.14980600 |
| C | -5.35163000 | 1.95056800  | 0.09788800  |

|    |             |             |             |
|----|-------------|-------------|-------------|
| H  | -3.47249000 | 2.45346600  | 0.99361100  |
| C  | -6.15929600 | 0.94828400  | -0.45932300 |
| H  | -7.14537100 | 1.18021600  | -0.83565800 |
| C  | 1.61473300  | 1.81567900  | 0.17573800  |
| C  | 2.67169000  | 2.39595300  | 0.89293000  |
| C  | 1.26729800  | 2.34362800  | -1.07890500 |
| C  | 3.34993800  | 3.50217100  | 0.36864000  |
| H  | 3.01309400  | 1.98474400  | 1.83436200  |
| C  | 1.94107800  | 3.45616300  | -1.58937600 |
| H  | 0.46601100  | 1.90431900  | -1.66489600 |
| C  | 2.98899200  | 4.04954500  | -0.87021000 |
| H  | 3.51517900  | 4.90519300  | -1.26868800 |
| C  | -2.49877800 | -2.24853700 | 1.92408300  |
| H  | -3.54672400 | -2.00027700 | 2.11338200  |
| H  | -2.47201000 | -2.96912700 | 1.10100000  |
| H  | -2.09492100 | -2.74486900 | 2.80752300  |
| C  | 0.85970500  | 1.09695100  | 3.13394800  |
| H  | 0.07503900  | 0.96159600  | 3.88237300  |
| H  | 1.81226900  | 0.83044300  | 3.60772600  |
| H  | 0.91350500  | 2.15544900  | 2.86777000  |
| O  | -0.38062500 | -1.37366800 | 3.47011000  |
| H  | 3.64248100  | -3.11050000 | -3.48218200 |
| C  | 0.71760100  | -1.92055600 | 4.20962800  |
| H  | 1.07810400  | -2.84034000 | 3.74390800  |
| H  | 1.54482700  | -1.21644700 | 4.31421900  |
| H  | 0.30496000  | -2.14534200 | 5.19507400  |
| O  | 4.05990300  | -2.76754100 | -2.67064300 |
| C  | 3.14560100  | -2.64015500 | -1.69490100 |
| C  | 3.57922200  | -2.16033400 | -0.45134200 |
| C  | 1.78647900  | -2.96841300 | -1.84809500 |
| C  | 2.66324900  | -2.00207200 | 0.61901300  |
| C  | 0.88099700  | -2.80291300 | -0.79624200 |
| C  | 1.29351700  | -2.30288800 | 0.46587800  |
| O  | 0.41618600  | -2.25555600 | 1.48595500  |
| Cl | 1.28366000  | -3.58850200 | -3.39732700 |
| Cl | -0.77909200 | -3.23605100 | -1.03015200 |
| C  | 4.96104400  | -1.84135200 | -0.28468000 |
| C  | 3.18347300  | -1.54052000 | 1.86671800  |
| N  | 6.08693600  | -1.58213300 | -0.14994400 |
| N  | 3.67633300  | -1.17339700 | 2.85443900  |
| O  | -6.34431500 | -1.40529400 | -1.07146800 |
| O  | -5.73440400 | 3.25643300  | 0.20993400  |
| O  | 4.36651200  | 3.98370900  | 1.14102700  |
| O  | 1.51234800  | 3.89878900  | -2.80706500 |
| C  | -7.64483200 | -1.16671300 | -1.60093400 |
| H  | -7.61634400 | -0.44300400 | -2.42473100 |
| H  | -7.99370500 | -2.12944200 | -1.97759700 |
| H  | -8.33418000 | -0.80881100 | -0.82643000 |
| C  | -7.02246700 | 3.63350500  | -0.26716200 |
| H  | -7.10751600 | 4.70469400  | -0.07817300 |
| H  | -7.12300900 | 3.44553400  | -1.34313300 |

|   |             |            |             |
|---|-------------|------------|-------------|
| H | -7.81994900 | 3.10581900 | 0.27016800  |
| C | 2.16326200  | 5.02226500 | -3.39369700 |
| H | 1.66147300  | 5.19129000 | -4.34759400 |
| H | 2.06242500  | 5.91667400 | -2.76694700 |
| H | 3.22646500  | 4.82137700 | -3.57311100 |
| C | 5.11951500  | 5.09572300 | 0.66558500  |
| H | 4.48736700  | 5.98277100 | 0.53697200  |
| H | 5.87004700  | 5.29522800 | 1.43182000  |
| H | 5.62035500  | 4.86479300 | -0.28243800 |

**meta-Me-Ph (TS\_A)**

E(B3LYP/BS1) = -2492.924712 au

H(B3LYP/BS1) = -2492.347392 au

G(B3LYP/BS1) = -2492.468616 au

E(M06-2X/BS2//B3LYP/BS1) = -2492.736351 au

|   |             |             |             |
|---|-------------|-------------|-------------|
| C | -0.93059100 | 2.21627100  | -0.80271100 |
| C | -2.25361600 | 1.74272300  | -0.27052500 |
| C | -0.00812200 | 1.32520900  | -1.51750300 |
| C | -2.87686400 | 0.68533400  | -0.85308300 |
| H | -2.40196200 | 0.25847400  | -1.73407200 |
| C | 0.19791800  | 0.06120500  | -0.98078100 |
| H | -0.48480700 | -0.21826400 | -0.18602000 |
| C | -4.15622600 | 0.06285000  | -0.50126200 |
| C | -4.63322500 | -0.03581500 | 0.81892400  |
| C | -4.91739000 | -0.51765400 | -1.53615800 |
| C | -5.84833000 | -0.66780200 | 1.10380300  |
| H | -4.03015600 | 0.33945800  | 1.63907400  |
| C | -6.13877600 | -1.14182400 | -1.28215400 |
| H | -4.54294400 | -0.47057600 | -2.55647500 |
| C | -6.58912400 | -1.20734700 | 0.04514900  |
| H | -7.53257000 | -1.70632600 | 0.25954400  |
| C | 1.11580300  | -0.99911300 | -1.34048300 |
| C | 2.29043700  | -0.83740600 | -2.11724100 |
| C | 0.84405000  | -2.27980800 | -0.80335700 |
| C | 3.14340700  | -1.90959100 | -2.36182900 |
| H | 2.55972300  | 0.13620100  | -2.50526900 |
| C | 1.67776800  | -3.37418400 | -1.04489500 |
| H | -0.05225800 | -2.41770200 | -0.20348000 |
| C | 2.82143100  | -3.16900900 | -1.82324100 |
| H | 3.48746600  | -4.00791800 | -2.01390100 |
| C | -2.83284200 | 2.58705900  | 0.83886800  |
| H | -3.92328700 | 2.52900900  | 0.86076800  |
| H | -2.45668900 | 2.27038300  | 1.81950200  |
| H | -2.54520700 | 3.63305100  | 0.69832300  |
| C | 0.69780600  | 1.85346800  | -2.73805000 |
| H | 0.10161400  | 2.64631200  | -3.19541400 |
| H | 1.68792200  | 2.26847400  | -2.51195400 |
| H | 0.83813400  | 1.05268000  | -3.46879300 |
| O | -1.06591300 | 3.52109100  | -1.27639100 |
| H | -0.21414700 | 2.30550100  | 0.32616300  |
| C | -0.02302500 | 4.47686100  | -1.03344000 |
| H | -0.36332200 | 5.40261700  | -1.50024600 |

|    |             |             |             |
|----|-------------|-------------|-------------|
| H  | 0.11041700  | 4.63244300  | 0.04111200  |
| H  | 0.92906000  | 4.17579500  | -1.47770400 |
| O  | 0.49835800  | 2.32697500  | 1.39415500  |
| C  | 1.34033100  | 1.34849000  | 1.43292900  |
| C  | 0.98918200  | 0.10770700  | 2.08010000  |
| C  | 2.69287300  | 1.46721300  | 0.91686600  |
| C  | 1.86720100  | -0.96222400 | 2.13010900  |
| C  | 3.57618700  | 0.42261800  | 0.96359600  |
| C  | 3.21518400  | -0.88812900 | 1.53749000  |
| O  | 3.98623400  | -1.84898300 | 1.55260800  |
| Cl | 3.14509700  | 3.01017200  | 0.26042500  |
| Cl | 5.20099100  | 0.55830800  | 0.37652000  |
| C  | -0.30788400 | 0.02313100  | 2.67906000  |
| C  | 1.52037200  | -2.18584800 | 2.77266000  |
| N  | -1.35900600 | -0.04995700 | 3.17171400  |
| N  | 1.24001700  | -3.18966900 | 3.29156000  |
| C  | 4.40312100  | -1.73462100 | -3.17691000 |
| H  | 5.29407000  | -1.95524200 | -2.57699000 |
| H  | 4.41573000  | -2.41719400 | -4.03490900 |
| H  | 4.49607800  | -0.71271000 | -3.55553700 |
| C  | 1.35332500  | -4.73071300 | -0.46401800 |
| H  | 1.31250600  | -4.68873700 | 0.63066300  |
| H  | 0.37621900  | -5.08681300 | -0.81127300 |
| H  | 2.10412600  | -5.47415500 | -0.74670900 |
| C  | -6.35597500 | -0.75605800 | 2.52503300  |
| H  | -7.02421900 | 0.08349500  | 2.75800400  |
| H  | -6.92394600 | -1.67746500 | 2.69070200  |
| H  | -5.53259700 | -0.72643600 | 3.24579900  |
| C  | -6.96274600 | -1.73260500 | -2.40307200 |
| H  | -7.32923400 | -2.73257600 | -2.14476600 |
| H  | -7.84338800 | -1.11293700 | -2.61586300 |
| H  | -6.38228900 | -1.81060900 | -3.32747500 |

### meta-Me-Ph (TS\_B)

E(B3LYP/BS1) = -2492.911863 au

H(B3LYP/BS1) = -2492.334011 au

G(B3LYP/BS1) = -2492.457043 au

E(M06-2X/BS2//B3LYP/BS1) = -2492.724775 au

|   |             |             |             |
|---|-------------|-------------|-------------|
| C | 0.06488100  | -1.21088600 | -1.92052200 |
| C | 1.39175700  | -0.58569500 | -1.94487200 |
| C | -1.16561000 | -0.32084500 | -1.96177300 |
| C | 1.55296500  | 0.52845200  | -1.14889100 |
| H | 0.64327400  | 0.89739200  | -0.68003000 |
| C | -1.94274300 | -0.07685800 | -0.89122800 |
| H | -1.63505200 | -0.49697000 | 0.06120700  |
| C | 2.70986100  | 1.36414500  | -0.88126900 |
| C | 4.05225500  | 1.01027000  | -1.13891700 |
| C | 2.45109500  | 2.62238000  | -0.28692600 |
| C | 5.09761200  | 1.88735500  | -0.84143800 |
| H | 4.29521300  | 0.03280500  | -1.53183700 |
| C | 3.47453400  | 3.51979300  | 0.00634900  |
| H | 1.42282800  | 2.89522100  | -0.06243300 |

|    |             |             |             |
|----|-------------|-------------|-------------|
| C  | 4.79318500  | 3.13445200  | -0.27968300 |
| H  | 5.60573700  | 3.81946800  | -0.04457200 |
| C  | -3.16364700 | 0.74822300  | -0.80474800 |
| C  | -4.14552900 | 0.77123100  | -1.80760000 |
| C  | -3.37816100 | 1.50097100  | 0.36453700  |
| C  | -5.30354200 | 1.54737500  | -1.67116300 |
| H  | -4.03081800 | 0.14828700  | -2.68937300 |
| C  | -4.51833900 | 2.29093300  | 0.52390900  |
| H  | -2.63520300 | 1.47157700  | 1.15841100  |
| C  | -5.47140800 | 2.30150400  | -0.50502100 |
| H  | -6.37273800 | 2.90021200  | -0.38621000 |
| C  | 2.47489600  | -1.23039000 | -2.77190100 |
| H  | 3.11058300  | -0.46304300 | -3.22181800 |
| H  | 3.11968000  | -1.88425000 | -2.17203400 |
| H  | 2.03928200  | -1.83486500 | -3.56815900 |
| C  | -1.37278100 | 0.27598600  | -3.34247500 |
| H  | -0.41356700 | 0.59218100  | -3.76558100 |
| H  | -1.81251800 | -0.44185300 | -4.04573800 |
| H  | -2.03248700 | 1.14460400  | -3.29330700 |
| O  | -0.00116400 | -2.32868100 | -2.70263500 |
| H  | 0.15373700  | -1.77258500 | -0.58581900 |
| C  | -1.22530800 | -3.08630500 | -2.71779700 |
| H  | -2.04728500 | -2.50707500 | -3.14470300 |
| H  | -1.01508700 | -3.95357200 | -3.34300300 |
| H  | -1.48743200 | -3.41271600 | -1.70750300 |
| O  | -1.52708900 | -3.39488100 | 1.09770600  |
| C  | -0.69777700 | -2.53823500 | 1.33783500  |
| C  | 0.59266400  | -2.45008400 | 0.53007400  |
| C  | -0.90001900 | -1.49737200 | 2.38005300  |
| C  | 1.68375100  | -1.69947300 | 1.08977600  |
| C  | 0.08369500  | -0.62656700 | 2.71049000  |
| C  | 1.47405800  | -0.70210400 | 2.12040100  |
| O  | 2.36479600  | 0.02495600  | 2.55448900  |
| Cl | -2.45572200 | -1.50493300 | 3.14123200  |
| Cl | -0.14084200 | 0.60036900  | 3.89892000  |
| C  | 0.93325300  | -3.72054600 | -0.08756900 |
| C  | 3.02008400  | -1.93925300 | 0.69142000  |
| N  | 1.21593100  | -4.72961700 | -0.58748200 |
| N  | 4.12198400  | -2.15469400 | 0.37071500  |
| C  | -6.34310900 | 1.57558500  | -2.76843100 |
| H  | -6.11613500 | 2.35501200  | -3.50787500 |
| H  | -6.38421400 | 0.62216200  | -3.30551200 |
| H  | -7.34033600 | 1.78701600  | -2.36923800 |
| C  | -4.72266200 | 3.12116800  | 1.77032300  |
| H  | -4.04532000 | 2.81170800  | 2.57220000  |
| H  | -4.53684100 | 4.18481200  | 1.57231900  |
| H  | -5.75064500 | 3.03885900  | 2.14080600  |
| C  | 3.18464300  | 4.86879200  | 0.62178200  |
| H  | 3.45514000  | 5.68196800  | -0.06298000 |
| H  | 2.12390500  | 4.97601900  | 0.86684400  |
| H  | 3.76252300  | 5.01748800  | 1.54135700  |

|   |            |            |             |
|---|------------|------------|-------------|
| C | 6.53023400 | 1.50369300 | -1.13227100 |
| H | 6.65375300 | 0.41665800 | -1.15792800 |
| H | 6.85259500 | 1.89502500 | -2.10598100 |
| H | 7.21253900 | 1.90889200 | -0.37791100 |

**meta-Me-Ph (TS\_D)**

E(B3LYP/BS1) = -2492.90768 au

H(B3LYP/BS1) = -2492.332218 au

G(B3LYP/BS1) = -2492.45855 au

E(M06-2X/BS2//B3LYP/BS1) = -2492.710239 au

|   |             |             |             |
|---|-------------|-------------|-------------|
| C | 0.52882300  | -0.78767600 | 2.47774000  |
| C | 1.88956700  | -0.49919400 | 1.99466000  |
| C | -0.33370000 | -1.82389200 | 1.83622600  |
| C | 2.38200900  | -1.13318400 | 0.87048600  |
| H | 1.81606000  | -1.98977600 | 0.51408100  |
| C | -0.67423700 | -1.65704000 | 0.52456600  |
| H | -0.29175300 | -0.75596700 | 0.04766200  |
| C | 3.59425500  | -0.86791700 | 0.11663600  |
| C | 4.20069600  | 0.40365700  | 0.01792100  |
| C | 4.15969800  | -1.93776000 | -0.61597700 |
| C | 5.34444900  | 0.60092100  | -0.75746600 |
| H | 3.74727600  | 1.25837900  | 0.50682600  |
| C | 5.31140400  | -1.77172400 | -1.38202100 |
| H | 3.68459300  | -2.91499600 | -0.56869900 |
| C | 5.89179600  | -0.49459000 | -1.44134500 |
| H | 6.78158600  | -0.34637000 | -2.05062000 |
| C | -1.43563800 | -2.50132500 | -0.39402900 |
| C | -2.31824100 | -3.53225600 | -0.01038900 |
| C | -1.29066600 | -2.23286200 | -1.77295100 |
| C | -3.01344900 | -4.28322000 | -0.96232700 |
| H | -2.50061200 | -3.73488300 | 1.03708200  |
| C | -1.96337600 | -2.97398500 | -2.74402400 |
| H | -0.62923500 | -1.42728900 | -2.08396300 |
| C | -2.82243800 | -3.99784700 | -2.32059500 |
| H | -3.36508600 | -4.57723700 | -3.06548400 |
| C | 2.68377300  | 0.51179900  | 2.78817600  |
| H | 3.75534300  | 0.38483400  | 2.62523200  |
| H | 2.41407200  | 1.53644600  | 2.50666900  |
| H | 2.47050800  | 0.39860500  | 3.85252100  |
| C | -0.72884800 | -3.00621000 | 2.69056300  |
| H | -0.10034300 | -3.05838300 | 3.58215400  |
| H | -1.77271700 | -2.95790100 | 3.02472700  |
| H | -0.61399600 | -3.93667900 | 2.12506900  |
| O | 0.44983000  | -0.70667400 | 3.86797400  |
| H | -0.00248900 | 0.42352200  | 2.03502500  |
| C | -0.79077900 | -0.29515000 | 4.45293500  |
| H | -0.65142300 | -0.37938900 | 5.53206800  |
| H | -1.01253700 | 0.74339800  | 4.18894300  |
| H | -1.62417200 | -0.93428800 | 4.14561900  |
| O | -0.19529400 | 1.65419300  | 1.81442300  |
| C | -0.90256800 | 2.15109200  | 0.85186600  |
| C | -0.28402400 | 3.10034500  | -0.03042000 |

|    |             |             |             |
|----|-------------|-------------|-------------|
| C  | -2.29991000 | 1.85050000  | 0.63781800  |
| C  | -0.98491900 | 3.68316700  | -1.08529800 |
| C  | -3.00311300 | 2.41784800  | -0.39816800 |
| C  | -2.38702300 | 3.36604700  | -1.33935800 |
| O  | -3.01431700 | 3.87325200  | -2.28327600 |
| Cl | -3.06568900 | 0.78318000  | 1.77236700  |
| Cl | -4.67518700 | 2.07437800  | -0.66257300 |
| C  | 1.09150400  | 3.40999000  | 0.20002500  |
| C  | -0.36057500 | 4.60540400  | -1.97230500 |
| N  | 2.21199200  | 3.66745000  | 0.37982500  |
| N  | 0.15258500  | 5.35918800  | -2.69608100 |
| C  | -3.95004500 | -5.39158500 | -0.53785700 |
| H  | -4.88422900 | -5.36574200 | -1.10971800 |
| H  | -3.49709800 | -6.37725400 | -0.70598800 |
| H  | -4.19904500 | -5.32020600 | 0.52537300  |
| C  | -1.77347500 | -2.68832900 | -4.21596100 |
| H  | -1.23228500 | -1.75069200 | -4.37462300 |
| H  | -1.20265300 | -3.48875300 | -4.70369800 |
| H  | -2.73589000 | -2.61836700 | -4.73559400 |
| C  | 5.92554300  | -2.92897100 | -2.13513000 |
| H  | 5.27008500  | -3.80497600 | -2.12474900 |
| H  | 6.12353000  | -2.66359800 | -3.17998100 |
| H  | 6.88474600  | -3.22455800 | -1.69167800 |
| C  | 5.98342600  | 1.96726600  | -0.85523100 |
| H  | 5.27973100  | 2.75578700  | -0.57154400 |
| H  | 6.85278400  | 2.04421700  | -0.18926100 |
| H  | 6.33683500  | 2.17106900  | -1.87174000 |

### meta-Me-Ph (2\_D)

E(B3LYP/BS1) = -2492.933112 au

H(B3LYP/BS1) = -2492.350816 au

G(B3LYP/BS1) = -2492.480104 au

E(M06-2X/BS2//B3LYP/BS1) = -2492.723518 au

|   |             |             |             |
|---|-------------|-------------|-------------|
| C | -2.47582100 | 1.39340600  | 2.25059700  |
| C | -2.61291500 | 0.02056500  | 1.60888300  |
| C | -2.28368600 | 2.28318200  | 1.01749600  |
| C | -3.82741200 | -0.29875400 | 1.04417900  |
| H | -4.63009000 | 0.41246700  | 1.22159200  |
| C | -0.99626900 | 2.37521700  | 0.52049100  |
| H | -0.24176500 | 1.82060900  | 1.07555700  |
| C | -4.23441800 | -1.48552000 | 0.32453600  |
| C | -3.35004300 | -2.32127800 | -0.40013400 |
| C | -5.61884200 | -1.79050100 | 0.30869900  |
| C | -3.82152200 | -3.43755400 | -1.08778600 |
| H | -2.29885500 | -2.06903800 | -0.47684500 |
| C | -6.11108100 | -2.91048200 | -0.35310300 |
| H | -6.30488100 | -1.13808300 | 0.84312700  |
| C | -5.19702600 | -3.72448400 | -1.04377800 |
| H | -5.56880100 | -4.59698500 | -1.57782800 |
| C | -0.44997100 | 3.09531300  | -0.60135700 |
| C | -1.18473100 | 3.89726100  | -1.51454400 |
| C | 0.95641000  | 2.98387600  | -0.78664300 |

|    |             |             |             |
|----|-------------|-------------|-------------|
| C  | -0.55072100 | 4.55698400  | -2.56089900 |
| H  | -2.25487600 | 4.00568100  | -1.41337100 |
| C  | 1.61154800  | 3.63550900  | -1.82487300 |
| H  | 1.51928800  | 2.35572400  | -0.10233300 |
| C  | 0.84353000  | 4.41956200  | -2.70180800 |
| H  | 1.34112900  | 4.93697800  | -3.51986100 |
| C  | -1.41133200 | -0.87584800 | 1.69108500  |
| H  | -1.68746800 | -1.92532700 | 1.57514000  |
| H  | -0.64779600 | -0.64422200 | 0.93881100  |
| H  | -0.93059200 | -0.74958100 | 2.66806400  |
| C  | -3.50294600 | 2.94296200  | 0.43942700  |
| H  | -4.38174200 | 2.72945300  | 1.04891300  |
| H  | -3.36609700 | 4.03118600  | 0.42402100  |
| H  | -3.70038500 | 2.62266300  | -0.58885100 |
| O  | -3.61051900 | 1.70798900  | 3.02300000  |
| H  | -1.57199800 | 1.41779800  | 2.87322100  |
| C  | -3.43574600 | 2.86410300  | 3.84177100  |
| H  | -4.35538700 | 2.97568200  | 4.41911700  |
| H  | -2.58771800 | 2.73366200  | 4.52736200  |
| H  | -3.27395400 | 3.77022900  | 3.24338400  |
| O  | 1.70124600  | 0.14143900  | 0.77005000  |
| C  | 2.67794700  | -0.58849800 | 0.49551200  |
| C  | 2.58577100  | -1.69374400 | -0.44198800 |
| C  | 4.00505900  | -0.38478700 | 1.10022700  |
| C  | 3.68199000  | -2.50880400 | -0.74656500 |
| C  | 5.07592100  | -1.17890100 | 0.80518800  |
| C  | 4.99136000  | -2.30398300 | -0.14608700 |
| O  | 5.96880600  | -3.02481200 | -0.41477400 |
| Cl | 4.12166700  | 0.93794200  | 2.22677200  |
| Cl | 6.63698500  | -0.92906500 | 1.52985600  |
| C  | 1.31584100  | -1.91451400 | -1.04602700 |
| C  | 3.56452900  | -3.58583100 | -1.67012100 |
| N  | 0.27572400  | -2.09204600 | -1.54115400 |
| N  | 3.45979500  | -4.46542300 | -2.42724800 |
| C  | 3.10410100  | 3.51038000  | -2.01638000 |
| H  | 3.54919000  | 2.86011000  | -1.25839400 |
| H  | 3.34150300  | 3.09479400  | -3.00275200 |
| H  | 3.59293900  | 4.48986600  | -1.95318100 |
| C  | -1.32861800 | 5.40741500  | -3.53641400 |
| H  | -0.96285500 | 6.44108600  | -3.53643200 |
| H  | -1.22266600 | 5.02900300  | -4.56005700 |
| H  | -2.39416500 | 5.42478600  | -3.29083200 |
| C  | -7.58250400 | -3.25021500 | -0.34085400 |
| H  | -7.96702900 | -3.38148400 | -1.35885400 |
| H  | -7.76516600 | -4.18932300 | 0.19567000  |
| H  | -8.16896300 | -2.46590000 | 0.14630900  |
| C  | -2.88157900 | -4.32406200 | -1.87035700 |
| H  | -1.87385900 | -3.90148300 | -1.90505200 |
| H  | -2.81679000 | -5.32105200 | -1.41674600 |
| H  | -3.23347600 | -4.46271700 | -2.89921800 |

**meta-Me-Ph (2\_A)**



E(B3LYP/BS1) = -2492.96664 au  
H(B3LYP/BS1) = -2492.382923 au  
G(B3LYP/BS1) = -2492.50504 au  
E(M06-2X/BS2//B3LYP/BS1) = -2492.800214 au

|   |             |             |             |
|---|-------------|-------------|-------------|
| C | -0.47048500 | -0.38967400 | 2.07157500  |
| C | -1.88730700 | -0.61617000 | 1.51817700  |
| C | 0.22157700  | 0.91435200  | 1.66872500  |
| C | -2.49454600 | 0.32272700  | 0.76261600  |
| H | -1.95075400 | 1.24241000  | 0.57219100  |
| C | 0.53208600  | 1.12289400  | 0.36990100  |
| H | 0.23442600  | 0.35840400  | -0.34430900 |
| C | -3.84936900 | 0.31742500  | 0.18202600  |
| C | -4.52402400 | -0.83962400 | -0.24272900 |
| C | -4.48333700 | 1.56185500  | -0.00487000 |
| C | -5.80316900 | -0.77061400 | -0.80919300 |
| H | -4.03802100 | -1.80638700 | -0.16840700 |
| C | -5.76182800 | 1.66102000  | -0.55586400 |
| H | -3.96082300 | 2.46828000  | 0.29431100  |
| C | -6.40884800 | 0.48202900  | -0.95400700 |
| H | -7.39996900 | 0.54471900  | -1.40004800 |
| C | 1.17470100  | 2.28669200  | -0.26451500 |
| C | 2.14590500  | 3.08170500  | 0.36623100  |
| C | 0.82869900  | 2.58457900  | -1.59728700 |
| C | 2.73898000  | 4.16467900  | -0.29509200 |
| H | 2.47903400  | 2.83378700  | 1.36854900  |
| C | 1.39414900  | 3.66451900  | -2.27657400 |
| H | 0.09815300  | 1.95862800  | -2.10565400 |
| C | 2.34963800  | 4.44520500  | -1.60905700 |
| H | 2.81123300  | 5.28078100  | -2.13228900 |
| C | -2.56293100 | -1.88049900 | 2.00327800  |
| H | -3.63986900 | -1.72526200 | 2.11396600  |
| H | -2.41714600 | -2.71727400 | 1.31340100  |
| H | -2.15536700 | -2.17865700 | 2.97031300  |
| C | 0.37969600  | 1.95993600  | 2.74891100  |
| H | -0.41833800 | 1.86336300  | 3.48932900  |
| H | 1.33323900  | 1.87366400  | 3.28376000  |
| H | 0.33845600  | 2.96330500  | 2.31718700  |
| O | -0.61908300 | -0.54476700 | 3.44549600  |
| H | 3.87785400  | -2.93515300 | -3.00627500 |
| C | 0.49586900  | -0.84790600 | 4.29202400  |
| H | 0.96951100  | -1.78403500 | 3.98830300  |
| H | 1.24101300  | -0.05062000 | 4.30650600  |
| H | 0.06565400  | -0.96103500 | 5.28908200  |
| O | 4.21935500  | -2.41870100 | -2.25309100 |
| C | 3.25095600  | -2.23044700 | -1.34136000 |
| C | 3.57378000  | -1.50922800 | -0.18377000 |
| C | 1.94031300  | -2.72211300 | -1.47905700 |
| C | 2.59688500  | -1.27897700 | 0.81769100  |
| C | 0.97451500  | -2.48803700 | -0.49626600 |
| C | 1.27411500  | -1.74961800 | 0.67802000  |
| O | 0.35150100  | -1.63764700 | 1.65105800  |

|    |             |             |             |
|----|-------------|-------------|-------------|
| Cl | 1.57604200  | -3.63213500 | -2.92016600 |
| Cl | -0.61972500 | -3.13151100 | -0.70422900 |
| C  | 4.90642800  | -1.01929200 | -0.03203800 |
| C  | 3.00816200  | -0.56590700 | 1.98508200  |
| N  | 5.99216400  | -0.62047700 | 0.09097100  |
| N  | 3.41568300  | 0.00939900  | 2.91047700  |
| C  | -6.51899500 | -2.03028000 | -1.24232000 |
| H  | -5.81292900 | -2.79491100 | -1.58325300 |
| H  | -7.09186200 | -2.46551000 | -0.41262000 |
| H  | -7.22538400 | -1.83041100 | -2.05466100 |
| C  | -6.44002500 | 3.00260300  | -0.71638100 |
| H  | -5.72450300 | 3.82590000  | -0.62587100 |
| H  | -6.93529100 | 3.08643200  | -1.69036200 |
| H  | -7.21208700 | 3.15094500  | 0.04994700  |
| C  | 3.77108100  | 5.01871900  | 0.40591200  |
| H  | 3.29368400  | 5.81850600  | 0.98754100  |
| H  | 4.37263000  | 4.42686800  | 1.10390400  |
| H  | 4.44803000  | 5.49634500  | -0.30970300 |
| C  | 0.98887400  | 3.99250000  | -3.69546400 |
| H  | 0.42855700  | 3.17035200  | -4.15139600 |
| H  | 0.35185900  | 4.88586600  | -3.72932200 |
| H  | 1.86324000  | 4.19883900  | -4.32318900 |

**Table 2**

**TS\_A** for **X=H, X'=H**

E(B3LYP/BS1) = -1231.983491 au

H(B3LYP/BS1) = -1231.507269 au

G(B3LYP/BS1) = -1231.593567 au

E(M06-2X/BS2//B3LYP/BS1) = -1231.822362 au

|   |             |             |             |
|---|-------------|-------------|-------------|
| C | -0.83660400 | 1.79969100  | -0.72574100 |
| C | -2.09254800 | 1.24554500  | -0.12584300 |
| C | 0.20230500  | 0.98029100  | -1.33158500 |
| C | -2.57465300 | 0.04559900  | -0.53604800 |
| H | -2.04215000 | -0.44353800 | -1.34910000 |
| C | 0.58777600  | -0.17837800 | -0.67298100 |
| H | -0.04616900 | -0.47699600 | 0.15487400  |
| C | -3.76212700 | -0.68722600 | -0.07770500 |
| C | -4.25778700 | -0.64123200 | 1.24106200  |
| C | -4.42121500 | -1.52695200 | -0.99979900 |
| C | -5.38366400 | -1.37797900 | 1.60809300  |
| H | -3.74175100 | -0.05385200 | 1.99229900  |
| C | -5.55042800 | -2.25568200 | -0.63484700 |
| H | -4.04108100 | -1.59533900 | -2.01629300 |
| C | -6.04059300 | -2.18070300 | 0.67230200  |
| H | -5.74280000 | -1.33158300 | 2.63268500  |
| H | -6.04517800 | -2.88707200 | -1.36789900 |
| H | -6.91803600 | -2.75234000 | 0.96159500  |
| C | 1.62948400  | -1.14668500 | -0.96946900 |
| C | 2.76684800  | -0.91141200 | -1.77806200 |
| C | 1.52539700  | -2.41365700 | -0.34461400 |
| C | 3.71952900  | -1.90796700 | -1.97841000 |

|   |             |             |             |
|---|-------------|-------------|-------------|
| H | 2.92405600  | 0.05594900  | -2.23529100 |
| C | 2.47444100  | -3.40837000 | -0.55288100 |
| H | 0.67233700  | -2.61200900 | 0.29864500  |
| C | 3.57796100  | -3.16002500 | -1.37460500 |
| H | 4.58444900  | -1.70061200 | -2.60231100 |
| H | 2.35930900  | -4.37417100 | -0.06908400 |
| H | 4.32499500  | -3.93204800 | -1.53573200 |
| C | -2.77759000 | 2.15623200  | 0.86677700  |
| H | -3.84794000 | 1.95127400  | 0.93761400  |
| H | -2.34261600 | 2.05251500  | 1.86938200  |
| H | -2.64583800 | 3.19863200  | 0.56287400  |
| C | 0.85598100  | 1.47764200  | -2.59898600 |
| H | 0.18538800  | 2.16460500  | -3.11961900 |
| H | 1.79968400  | 2.00622200  | -2.41778400 |
| H | 1.07774400  | 0.63651400  | -3.26212400 |
| O | -1.09480600 | 3.04571600  | -1.30782200 |
| H | -0.09308000 | 2.06997700  | 0.48655200  |
| C | -0.15950300 | 4.10803100  | -1.08464600 |
| H | -0.53642200 | 4.95969600  | -1.65439900 |
| H | -0.11309800 | 4.36772400  | -0.02240200 |
| H | 0.84620000  | 3.85829800  | -1.43815500 |
| O | 0.55174600  | 2.20973900  | 1.44334600  |
| C | 1.56714900  | 1.37753400  | 1.48691400  |
| C | 1.50160600  | 0.19234500  | 2.30354700  |
| C | 2.81246900  | 1.70013800  | 0.83948800  |
| C | 2.58288400  | -0.62127100 | 2.44594900  |
| C | 3.89795300  | 0.88864200  | 0.96420300  |
| C | 3.85369300  | -0.33886200 | 1.76797500  |
| O | 4.84088900  | -1.08961100 | 1.87831800  |
| H | 0.56229300  | -0.01464600 | 2.80999400  |
| H | 2.54846100  | -1.50740600 | 3.07323700  |
| H | 4.84247600  | 1.12531600  | 0.48275100  |
| H | 2.85354500  | 2.61641800  | 0.25643100  |

**TS\_B** for **X=H, X'=H**

E(B3LYP/BS1) = -1231.972488 au

H(B3LYP/BS1) = -1231.495576 au

G(B3LYP/BS1) = -1231.583443 au

E(M06-2X/BS2//B3LYP/BS1) = -1231.809696 au

|   |             |             |             |
|---|-------------|-------------|-------------|
| C | -0.16450200 | -1.60120300 | -1.12442400 |
| C | 1.18793900  | -1.14771700 | -1.31569000 |
| C | -1.33593000 | -0.66386400 | -1.31438200 |
| C | 1.52663300  | 0.08014900  | -0.76802500 |
| H | 0.68849500  | 0.69499900  | -0.45108300 |
| C | -1.91905400 | 0.00520300  | -0.30158500 |
| H | -1.48791400 | -0.11014200 | 0.68836800  |
| C | 2.79665600  | 0.81111900  | -0.79246800 |
| C | 4.07773000  | 0.22237500  | -0.85998600 |
| C | 2.72729000  | 2.21903800  | -0.71847300 |
| C | 5.22596900  | 1.01111800  | -0.88885400 |
| H | 4.18602900  | -0.85505100 | -0.85661800 |
| C | 3.87534800  | 3.00657800  | -0.75715500 |

|   |             |             |             |
|---|-------------|-------------|-------------|
| H | 1.75303100  | 2.69522800  | -0.64367900 |
| C | 5.13262400  | 2.40518900  | -0.84759100 |
| H | 6.20053000  | 0.53289700  | -0.93562400 |
| H | 3.78852600  | 4.08854900  | -0.70972600 |
| H | 6.03153200  | 3.01471900  | -0.87278000 |
| C | -3.05938300 | 0.94133400  | -0.33833300 |
| C | -4.17324200 | 0.78155900  | -1.18357300 |
| C | -3.06145200 | 2.02549500  | 0.56114500  |
| C | -5.23034100 | 1.69221500  | -1.15266700 |
| H | -4.23189700 | -0.07649000 | -1.84457400 |
| C | -4.11354100 | 2.93867800  | 0.58664200  |
| H | -2.22185300 | 2.15138600  | 1.24025100  |
| C | -5.20214600 | 2.77821900  | -0.27524500 |
| H | -6.08280900 | 1.54519600  | -1.81035100 |
| H | -4.08676500 | 3.77263300  | 1.28277800  |
| H | -6.02640000 | 3.48570000  | -0.25350000 |
| C | 2.18283700  | -2.11690400 | -1.90707300 |
| H | 2.96177200  | -1.58261000 | -2.45660900 |
| H | 2.67602600  | -2.72283000 | -1.13431100 |
| H | 1.68583600  | -2.80891800 | -2.58885900 |
| C | -1.73380900 | -0.54914600 | -2.77503900 |
| H | -0.83985600 | -0.53754000 | -3.40768100 |
| H | -2.34868600 | -1.39564000 | -3.10585600 |
| H | -2.29872800 | 0.36725400  | -2.95976500 |
| O | -0.38563300 | -2.88685300 | -1.56623900 |
| H | 0.01579900  | -1.77267400 | 0.42520600  |
| C | -1.57458400 | -3.53667600 | -1.09723000 |
| H | -2.48055300 | -3.04124600 | -1.46012400 |
| H | -1.53004700 | -4.55219000 | -1.49312800 |
| H | -1.59038100 | -3.56395400 | -0.00169400 |
| O | -1.45342300 | -2.67286800 | 2.65718600  |
| C | -0.62403700 | -1.77993400 | 2.51059000  |
| C | 0.54275000  | -1.93760200 | 1.56380900  |
| C | -0.74703600 | -0.48508500 | 3.21610800  |
| C | 1.63254700  | -1.01515800 | 1.66588900  |
| C | 0.23302400  | 0.43490000  | 3.15001200  |
| C | 1.52748600  | 0.19603400  | 2.43725200  |
| O | 2.45451000  | 1.01093800  | 2.59301500  |
| H | 0.15618900  | 1.38504600  | 3.67317600  |
| H | -1.65535900 | -0.33041600 | 3.79253400  |
| H | 2.62279500  | -1.29818300 | 1.32960700  |
| H | 0.81239100  | -2.99093800 | 1.44043500  |

**TS\_D for X=H, X'=H**

E(B3LYP/BS1) = -1231.966277 au

H(B3LYP/BS1) = -1231.487473 au

G(B3LYP/BS1) = -1231.582497 au

E(M06-2X/BS2//B3LYP/BS1) = -1231.785791 au

|   |            |             |            |
|---|------------|-------------|------------|
| C | 0.60376500 | 0.63417900  | 1.48268300 |
| C | 1.96829000 | 1.05587800  | 1.02250500 |
| C | 0.26812600 | -0.85134200 | 1.38532300 |
| C | 2.57669200 | 0.33895200  | 0.01839300 |

|   |             |             |             |
|---|-------------|-------------|-------------|
| H | 1.99412800  | -0.48107400 | -0.39462500 |
| C | -0.48911400 | -1.28380100 | 0.35631000  |
| H | -0.88134900 | -0.51958500 | -0.31235800 |
| C | 3.87235700  | 0.51040900  | -0.60949100 |
| C | 4.97624100  | 1.17896700  | -0.02542900 |
| C | 4.05474600  | -0.08171400 | -1.88485300 |
| C | 6.18388500  | 1.28056500  | -0.70661300 |
| H | 4.90253100  | 1.57954500  | 0.97768300  |
| C | 5.25767800  | 0.03754200  | -2.56828200 |
| H | 3.22663500  | -0.62072900 | -2.33701000 |
| C | 6.32794000  | 0.72353900  | -1.98266500 |
| H | 7.02206200  | 1.78799600  | -0.23834300 |
| H | 5.36803200  | -0.40845400 | -3.55217200 |
| H | 7.27321800  | 0.81051700  | -2.51033200 |
| C | -0.90306300 | -2.65256300 | 0.00086900  |
| C | -0.13471900 | -3.80306300 | 0.26264200  |
| C | -2.12544100 | -2.81519300 | -0.68163300 |
| C | -0.58893000 | -5.06679700 | -0.11626800 |
| H | 0.83703200  | -3.71042900 | 0.73462600  |
| C | -2.58242500 | -4.07793400 | -1.05208700 |
| H | -2.72363900 | -1.93631400 | -0.90996100 |
| C | -1.81620700 | -5.21172300 | -0.76707000 |
| H | 0.02397000  | -5.94001200 | 0.09055700  |
| H | -3.53343700 | -4.17720600 | -1.56827300 |
| H | -2.16721000 | -6.19735000 | -1.05991800 |
| C | 2.49455100  | 2.33511900  | 1.60658100  |
| H | 3.01467700  | 2.14611900  | 2.55561400  |
| H | 3.18244600  | 2.84300700  | 0.92866500  |
| H | 1.66530000  | 3.00648600  | 1.84492100  |
| C | 0.85209200  | -1.70686500 | 2.48455600  |
| H | 0.88552700  | -1.14601900 | 3.42300200  |
| H | 0.27064400  | -2.61842500 | 2.64248900  |
| H | 1.88507100  | -2.00046600 | 2.25155200  |
| O | 0.37731800  | 1.17384300  | 2.76596700  |
| H | -0.07494500 | 1.20688800  | 0.73251700  |
| C | -0.97666900 | 1.17519600  | 3.21186000  |
| H | -0.96205600 | 1.58048700  | 4.22526200  |
| H | -1.59342200 | 1.81610300  | 2.57059600  |
| H | -1.40073400 | 0.16429300  | 3.22923300  |
| O | -1.05846600 | 2.03606200  | -0.35597000 |
| C | -2.34373100 | 2.00414700  | -0.53065000 |
| C | -2.92073000 | 2.86707400  | -1.52952500 |
| C | -3.23256800 | 1.15162100  | 0.20560900  |
| C | -4.26914100 | 2.87672000  | -1.76543500 |
| C | -4.58377400 | 1.16224600  | -0.03338500 |
| C | -5.18870400 | 2.02421700  | -1.03212600 |
| O | -6.43192600 | 2.03189600  | -1.24931500 |
| H | -2.80811900 | 0.49129600  | 0.95450700  |
| H | -5.25001900 | 0.51341700  | 0.52957300  |
| H | -4.69550400 | 3.53384300  | -2.51943200 |
| H | -2.24313400 | 3.50941100  | -2.08473300 |

## 2\_D for X=H, X'=H

E(B3LYP/BS1) = -1231.965279 au

H(B3LYP/BS1) = -1231.484374 au

G(B3LYP/BS1) = -1231.579059 au

E(M06-2X/BS2//B3LYP/BS1) = -1231.786145 au

|   |             |             |             |
|---|-------------|-------------|-------------|
| C | -0.83020000 | -0.08674700 | 1.93853600  |
| C | -1.47647100 | -0.92431900 | 0.83839100  |
| C | -0.89684400 | 1.33683700  | 1.37799200  |
| C | -2.82822000 | -0.77680800 | 0.64471500  |
| H | -3.34899000 | -0.16010800 | 1.37305600  |
| C | 0.07381600  | 1.67171800  | 0.44870700  |
| H | 0.79352000  | 0.88761600  | 0.20770600  |
| C | -3.70442700 | -1.39212200 | -0.33730800 |
| C | -3.29534500 | -1.78386500 | -1.63408800 |
| C | -5.06834300 | -1.55217500 | 0.00843400  |
| C | -4.20596000 | -2.34091100 | -2.52494400 |
| H | -2.27712800 | -1.60616600 | -1.95910700 |
| C | -5.97058500 | -2.12621100 | -0.87843800 |
| H | -5.40340300 | -1.23299400 | 0.99167500  |
| C | -5.54149000 | -2.52679300 | -2.14892300 |
| H | -3.87807500 | -2.62306700 | -3.52101400 |
| H | -7.00884300 | -2.25494200 | -0.58751300 |
| H | -6.24661400 | -2.96701800 | -2.84789000 |
| C | 0.31385000  | 2.88892600  | -0.28491600 |
| C | -0.40377700 | 4.10900600  | -0.15260200 |
| C | 1.38305600  | 2.83998200  | -1.22582100 |
| C | -0.07139500 | 5.20808900  | -0.93036500 |
| H | -1.21356300 | 4.20090000  | 0.55663900  |
| C | 1.70093800  | 3.94283800  | -2.00462200 |
| H | 1.93402900  | 1.90724100  | -1.32397000 |
| C | 0.97712800  | 5.13240400  | -1.85930900 |
| H | -0.62774700 | 6.13355000  | -0.81718300 |
| H | 2.51464400  | 3.88466200  | -2.72122600 |
| H | 1.22947800  | 6.00040400  | -2.46145600 |
| C | -0.56362700 | -1.86576200 | 0.11963600  |
| H | -1.10067700 | -2.57684600 | -0.50811800 |
| H | 0.19223800  | -1.34442800 | -0.49228800 |
| H | 0.00999500  | -2.42913700 | 0.86853300  |
| C | -2.01814000 | 2.22035600  | 1.84197100  |
| H | -2.66621000 | 1.68913700  | 2.54000300  |
| H | -1.61129400 | 3.09154800  | 2.37198000  |
| H | -2.62082900 | 2.59709600  | 1.00915200  |
| O | -1.51281500 | -0.26472200 | 3.15978400  |
| H | 0.21976400  | -0.39063400 | 2.04394200  |
| C | -0.78990200 | 0.22253400  | 4.29030900  |
| H | -1.39261200 | -0.01576100 | 5.16877600  |
| H | 0.18744100  | -0.27144700 | 4.37309800  |
| H | -0.63679900 | 1.30876500  | 4.24318700  |
| O | 2.08481200  | -0.35992500 | -0.97169000 |
| C | 3.15453900  | -1.00271800 | -0.67542300 |
| C | 3.25480800  | -2.43513200 | -0.83743500 |

|   |            |             |             |
|---|------------|-------------|-------------|
| C | 4.32989500 | -0.33643100 | -0.16184200 |
| C | 4.39708100 | -3.12353300 | -0.51861200 |
| C | 5.47255800 | -1.02346600 | 0.15722400  |
| C | 5.58062100 | -2.46320200 | 0.00200100  |
| O | 6.63475900 | -3.09868500 | 0.29969400  |
| H | 4.45332300 | -4.20257200 | -0.64919100 |
| H | 2.38277100 | -2.95311800 | -1.23185700 |
| H | 4.27348100 | 0.74300000  | -0.03417600 |
| H | 6.34666700 | -0.50398600 | 0.54533800  |

**2\_A for X=H, X'=H**

E(B3LYP/BS1) = -1232.036133 au

H(B3LYP/BS1) = -1231.55336 au

G(B3LYP/BS1) = -1231.64128 au

E(M06-2X/BS2//B3LYP/BS1) = -1231.893526 au

|   |             |             |             |
|---|-------------|-------------|-------------|
| C | -0.23186000 | -1.15924100 | 0.98636700  |
| C | -1.65492800 | -1.28836200 | 0.39525100  |
| C | 0.23865900  | 0.29032900  | 1.18634200  |
| C | -2.44430100 | -0.20902800 | 0.23800100  |
| H | -2.04966700 | 0.75229900  | 0.55556500  |
| C | 0.61250600  | 1.00103100  | 0.10323500  |
| H | 0.54361800  | 0.50093500  | -0.86096000 |
| C | -3.82298900 | -0.13490200 | -0.28292400 |
| C | -4.32474300 | -0.96030000 | -1.30717000 |
| C | -4.67780900 | 0.85639300  | 0.23931100  |
| C | -5.63632600 | -0.81981700 | -1.76356800 |
| H | -3.67817400 | -1.69583500 | -1.77294000 |
| C | -5.98969800 | 0.99194100  | -0.21015100 |
| H | -4.30331900 | 1.52045300  | 1.01495000  |
| C | -6.47756200 | 0.14945700  | -1.21322000 |
| H | -5.99779000 | -1.46584000 | -2.55938300 |
| H | -6.63002500 | 1.75865900  | 0.21802700  |
| H | -7.49831700 | 0.25584500  | -1.57007000 |
| C | 1.07195600  | 2.39688700  | 0.00809100  |
| C | 1.80343800  | 3.05551600  | 1.01529000  |
| C | 0.80466100  | 3.10485700  | -1.18111700 |
| C | 2.21917300  | 4.37726300  | 0.84984500  |
| H | 2.07867600  | 2.52376000  | 1.91931800  |
| C | 1.21215600  | 4.42718200  | -1.34269600 |
| H | 0.26196300  | 2.60697800  | -1.98123300 |
| C | 1.91924800  | 5.07216600  | -0.32387500 |
| H | 2.78811900  | 4.86177500  | 1.63893200  |
| H | 0.98364200  | 4.95295400  | -2.26591200 |
| H | 2.24383600  | 6.10145400  | -0.44911200 |
| C | -2.07028300 | -2.71077400 | 0.09976300  |
| H | -3.15612500 | -2.82700000 | 0.14903600  |
| H | -1.74223700 | -3.02932500 | -0.89708000 |
| H | -1.61434500 | -3.39083000 | 0.82323700  |
| C | 0.10847800  | 0.85269400  | 2.58182500  |
| H | -0.73895900 | 0.39404400  | 3.09776100  |
| H | 0.99554200  | 0.65857200  | 3.19997600  |
| H | -0.03862500 | 1.93555100  | 2.55620600  |

|   |             |             |             |
|---|-------------|-------------|-------------|
| O | -0.33686100 | -1.86301500 | 2.21789200  |
| H | 5.90937300  | -1.81259800 | -2.59473600 |
| C | 0.83857700  | -2.36353500 | 2.84575000  |
| H | 1.41291900  | -3.00613300 | 2.17123800  |
| H | 1.48480500  | -1.56258300 | 3.22552800  |
| H | 0.48917600  | -2.95729000 | 3.69381400  |
| O | 5.83926700  | -1.49911400 | -1.67873700 |
| C | 4.53355300  | -1.59149700 | -1.27035200 |
| C | 4.22932000  | -1.17282200 | 0.02796700  |
| C | 3.51092000  | -2.07982300 | -2.09031600 |
| C | 2.92211600  | -1.24356200 | 0.50989600  |
| C | 2.20323900  | -2.13813400 | -1.61133000 |
| C | 1.89449100  | -1.72813000 | -0.30895500 |
| O | 0.57568700  | -1.92631300 | 0.05683600  |
| H | 1.40402300  | -2.51244200 | -2.24354900 |
| H | 3.73064000  | -2.40922800 | -3.10345800 |
| H | 5.02521400  | -0.79297000 | 0.66138800  |
| H | 2.71935600  | -0.90839600 | 1.51797000  |

**TS\_A for X=Cl, X'=Cl**

E(B3LYP/BS1) = -3070.350347 au

H(B3LYP/BS1) = -3069.907589 au

G(B3LYP/BS1) = -3070.00697 au

E(M06-2X/BS2//B3LYP/BS1) = -3070.225522 au

|   |             |             |             |
|---|-------------|-------------|-------------|
| C | 1.35765700  | 2.10939900  | 0.27233000  |
| C | 2.61277900  | 1.40702100  | -0.15520700 |
| C | 0.43509000  | 1.55825600  | 1.26704200  |
| C | 3.20210800  | 0.50825300  | 0.67442500  |
| H | 2.75124700  | 0.37681500  | 1.65553800  |
| C | 0.10018600  | 0.21887200  | 1.15386700  |
| H | 0.68730000  | -0.34843300 | 0.43966400  |
| C | 4.41787100  | -0.28622000 | 0.46847600  |
| C | 4.84980700  | -0.75451500 | -0.78914600 |
| C | 5.17534700  | -0.64432300 | 1.60359400  |
| C | 6.00875800  | -1.52084200 | -0.90504700 |
| H | 4.25975700  | -0.54895800 | -1.67504700 |
| C | 6.33828000  | -1.40045500 | 1.48514000  |
| H | 4.84521500  | -0.31247400 | 2.58495400  |
| C | 6.76279600  | -1.83920200 | 0.22730000  |
| H | 6.31880000  | -1.87795500 | -1.88326200 |
| H | 6.91034300  | -1.65381500 | 2.37339500  |
| H | 7.66641200  | -2.43474000 | 0.13231100  |
| C | -0.83590900 | -0.60124900 | 1.90299900  |
| C | -1.92649300 | -0.11420500 | 2.66219200  |
| C | -0.67494200 | -2.00518000 | 1.80819800  |
| C | -2.78843700 | -0.99279100 | 3.31181900  |
| H | -2.12322900 | 0.94791700  | 2.72229600  |
| C | -1.53282300 | -2.87895500 | 2.46705400  |
| H | 0.14741400  | -2.40194300 | 1.21933800  |
| C | -2.59485800 | -2.37502500 | 3.22307000  |
| H | -3.62374100 | -0.59721700 | 3.88212000  |
| H | -1.38001000 | -3.95087500 | 2.38439200  |



|    |             |             |             |
|----|-------------|-------------|-------------|
| H  | -3.27277400 | -3.05374500 | 3.73238400  |
| C  | 3.17657700  | 1.86092600  | -1.48069900 |
| H  | 4.25793200  | 1.71619200  | -1.53069600 |
| H  | 2.72030100  | 1.31502900  | -2.31615100 |
| H  | 2.96466500  | 2.92330200  | -1.62960500 |
| C  | -0.13389200 | 2.48836800  | 2.30873900  |
| H  | 0.54006300  | 3.33498500  | 2.45790600  |
| H  | -1.11746600 | 2.88882400  | 2.03496700  |
| H  | -0.24890600 | 1.96130400  | 3.26001500  |
| O  | 1.58339700  | 3.48341900  | 0.29102100  |
| H  | 0.53509500  | 1.86276500  | -0.83084500 |
| C  | 0.56579100  | 4.37659100  | -0.18402100 |
| H  | 0.96127900  | 5.38100900  | -0.02364700 |
| H  | 0.38592800  | 4.21752100  | -1.25156500 |
| H  | -0.37353600 | 4.26450400  | 0.36225400  |
| O  | -0.22315500 | 1.60581900  | -1.74885200 |
| C  | -1.09623700 | 0.69701300  | -1.44824100 |
| C  | -0.86208600 | -0.69958400 | -1.76210900 |
| C  | -2.39736300 | 1.04146800  | -0.91071500 |
| C  | -1.79497900 | -1.66298500 | -1.49792700 |
| C  | -3.33945200 | 0.08831700  | -0.63888700 |
| C  | -3.09754600 | -1.34525100 | -0.88189300 |
| O  | -3.93351500 | -2.21120700 | -0.62028100 |
| Cl | -2.72103200 | 2.73216700  | -0.65849000 |
| Cl | -4.91416700 | 0.48756900  | -0.02453000 |
| Cl | -1.54288600 | -3.33397500 | -1.89756600 |
| Cl | 0.66078700  | -1.08790700 | -2.51176300 |

**TS\_B for X=Cl, X'=Cl**

E(B3LYP/BS1) = -3070.33312 au

H(B3LYP/BS1) = -3069.889902 au

G(B3LYP/BS1) = -3069.990277 au

E(M06-2X/BS2//B3LYP/BS1) = -3070.204583 au

|   |             |             |             |
|---|-------------|-------------|-------------|
| C | 0.51821700  | -1.95485900 | 0.14734000  |
| C | -0.84775900 | -1.94721600 | 0.70430900  |
| C | 1.66746400  | -1.35855400 | 0.93911300  |
| C | -1.29057900 | -0.77210200 | 1.24820000  |
| H | -0.55458200 | 0.02928600  | 1.31450900  |
| C | 2.64056200  | -0.67209300 | 0.30106800  |
| H | 2.49276900  | -0.46484600 | -0.75453400 |
| C | -2.57101800 | -0.44423200 | 1.87268200  |
| C | -3.80571600 | -1.02236300 | 1.50954300  |
| C | -2.57052000 | 0.54335400  | 2.88218300  |
| C | -4.98044200 | -0.65591700 | 2.16405100  |
| H | -3.85480700 | -1.72899900 | 0.69019500  |
| C | -3.74298700 | 0.89683400  | 3.54251800  |
| H | -1.63262500 | 1.01997400  | 3.15575500  |
| C | -4.95369500 | 0.29303300  | 3.18875500  |
| H | -5.92206900 | -1.10743200 | 1.86494500  |
| H | -3.71543200 | 1.64728300  | 4.32737500  |
| H | -5.87178200 | 0.57206000  | 3.69798900  |
| C | 3.90017400  | -0.11501400 | 0.82525800  |

|    |             |             |             |
|----|-------------|-------------|-------------|
| C  | 4.66715500  | -0.71613500 | 1.84162400  |
| C  | 4.39407400  | 1.06311000  | 0.22894700  |
| C  | 5.86417800  | -0.13931400 | 2.26696700  |
| H  | 4.35011100  | -1.65664800 | 2.27792800  |
| C  | 5.58346800  | 1.64378000  | 0.66298900  |
| H  | 3.82764200  | 1.52461500  | -0.57565900 |
| C  | 6.32215300  | 1.04632200  | 1.68830000  |
| H  | 6.44425400  | -0.62427600 | 3.04731500  |
| H  | 5.93823600  | 2.55875000  | 0.19660400  |
| H  | 7.25337800  | 1.49406500  | 2.02402900  |
| C  | -1.65095700 | -3.22094200 | 0.62136900  |
| H  | -2.43019800 | -3.23605700 | 1.38576900  |
| H  | -2.13150700 | -3.34490000 | -0.35568600 |
| H  | -0.99606300 | -4.08409200 | 0.76597700  |
| C  | 1.68614100  | -1.69610000 | 2.41703400  |
| H  | 0.68377600  | -1.64696000 | 2.84743300  |
| H  | 2.05530200  | -2.71729300 | 2.58535400  |
| H  | 2.33259600  | -1.01062900 | 2.96955300  |
| O  | 0.75642900  | -3.12098200 | -0.52616500 |
| H  | 0.25874000  | -0.97968200 | -0.93640600 |
| C  | 2.08120100  | -3.51396000 | -0.91563400 |
| H  | 2.74398200  | -3.58655500 | -0.05004200 |
| H  | 1.95385200  | -4.49567700 | -1.37293100 |
| H  | 2.50003200  | -2.82006700 | -1.64800600 |
| O  | 1.73800500  | 1.11328300  | -2.32379800 |
| C  | 0.61536100  | 1.02681800  | -1.86425700 |
| C  | -0.19991700 | -0.26282900 | -1.97656700 |
| C  | -0.01239000 | 2.15367300  | -1.12590400 |
| C  | -1.60811500 | -0.12631900 | -1.86020000 |
| C  | -1.33449500 | 2.14906300  | -0.85166900 |
| C  | -2.25025900 | 1.01600700  | -1.26825200 |
| O  | -3.46677400 | 1.13356400  | -1.11290400 |
| Cl | 1.03734800  | 3.48004600  | -0.74382500 |
| Cl | -2.11278700 | 3.46430400  | -0.05408600 |
| Cl | 0.41578800  | -1.29936500 | -3.30979100 |
| Cl | -2.67415500 | -1.38811000 | -2.41542300 |

**TS\_D for X=Cl, X'=Cl**

E(B3LYP/BS1) = -3070.331687 au

H(B3LYP/BS1) = -3069.890662 au

G(B3LYP/BS1) = -3069.995962 au

E(M06-2X/BS2//B3LYP/BS1) = -3070.193975 au

|   |             |             |             |
|---|-------------|-------------|-------------|
| C | -1.45104000 | 0.90112900  | 1.95080800  |
| C | -2.46679600 | -0.05788000 | 1.45689700  |
| C | -1.11409100 | 2.13651400  | 1.18011600  |
| C | -3.09166400 | 0.15109100  | 0.24741900  |
| H | -2.94176600 | 1.12528300  | -0.20978900 |
| C | -0.57792800 | 1.98169800  | -0.06711200 |
| H | -0.42450100 | 0.95342000  | -0.39044400 |
| C | -3.99755000 | -0.71131600 | -0.49395300 |
| C | -4.01084900 | -2.12323700 | -0.41233900 |
| C | -4.89315600 | -0.09290000 | -1.39918000 |

|    |             |             |             |
|----|-------------|-------------|-------------|
| C  | -4.90011400 | -2.87092600 | -1.17844200 |
| H  | -3.29919400 | -2.63706700 | 0.22225200  |
| C  | -5.78940400 | -0.84224200 | -2.15239300 |
| H  | -4.88176400 | 0.98988100  | -1.49325300 |
| C  | -5.79930900 | -2.23690800 | -2.04230000 |
| H  | -4.88708700 | -3.95480100 | -1.10827900 |
| H  | -6.47543900 | -0.34334700 | -2.83078300 |
| H  | -6.49351600 | -2.82608400 | -2.63457500 |
| C  | -0.20019900 | 2.95814900  | -1.08511100 |
| C  | 0.02540400  | 4.33391000  | -0.85610400 |
| C  | -0.02139100 | 2.47343400  | -2.40162600 |
| C  | 0.38867200  | 5.17945800  | -1.90196300 |
| H  | -0.04840700 | 4.74400900  | 0.14212800  |
| C  | 0.33086900  | 3.32216600  | -3.44545900 |
| H  | -0.17235400 | 1.41500900  | -2.59779800 |
| C  | 0.53492600  | 4.68339800  | -3.20031300 |
| H  | 0.56520400  | 6.23209700  | -1.69955300 |
| H  | 0.45248900  | 2.92283200  | -4.44828400 |
| H  | 0.81577000  | 5.34926400  | -4.01127400 |
| C  | -2.74847900 | -1.24437300 | 2.34696500  |
| H  | -3.76079700 | -1.62312700 | 2.19165600  |
| H  | -2.04127100 | -2.05852400 | 2.14874900  |
| H  | -2.63538100 | -0.96021800 | 3.39418500  |
| C  | -1.42739000 | 3.46087900  | 1.83345000  |
| H  | -2.10551200 | 3.31699500  | 2.67718500  |
| H  | -0.53091400 | 3.96761000  | 2.21220300  |
| H  | -1.90096100 | 4.13672100  | 1.11378600  |
| O  | -1.54521000 | 1.05952300  | 3.33526500  |
| H  | -0.39263300 | 0.09962600  | 1.77025400  |
| C  | -0.35015700 | 1.36796900  | 4.06183400  |
| H  | -0.65992100 | 1.49009200  | 5.10118000  |
| H  | 0.36759100  | 0.54633700  | 3.98116900  |
| H  | 0.11695400  | 2.29406400  | 3.71257400  |
| O  | 0.42247300  | -0.94410200 | 1.78092900  |
| C  | 1.41931500  | -1.13193100 | 0.97593400  |
| C  | 1.50744200  | -2.37312200 | 0.24549000  |
| C  | 2.49412800  | -0.19247000 | 0.79381200  |
| C  | 2.54093900  | -2.63400100 | -0.62267500 |
| C  | 3.53394100  | -0.44269400 | -0.07378700 |
| C  | 3.62409100  | -1.67741500 | -0.85242200 |
| O  | 4.55699900  | -1.90194700 | -1.64451900 |
| Cl | 2.45898800  | 1.25754000  | 1.75974500  |
| Cl | 4.83237500  | 0.68764300  | -0.29459100 |
| Cl | 0.22400800  | -3.52471900 | 0.50228100  |
| Cl | 2.63157300  | -4.11447300 | -1.52402100 |

**2\_D for X=Cl, X'=Cl**

E(B3LYP/BS1) = -3070.35119 au

H(B3LYP/BS1) = -3069.903004 au

G(B3LYP/BS1) = -3070.012288 au

E(M06-2X/BS2//B3LYP/BS1) = -3070.202274 au

|   |            |             |            |
|---|------------|-------------|------------|
| C | 1.95612700 | -0.14984400 | 1.48382600 |
|---|------------|-------------|------------|

|    |             |             |             |
|----|-------------|-------------|-------------|
| C  | 2.76880600  | 0.74520300  | 0.56149200  |
| C  | 2.19814200  | -1.49527500 | 0.79055300  |
| C  | 4.10793100  | 0.90561800  | 0.86160700  |
| H  | 4.43773000  | 0.38987600  | 1.75871800  |
| C  | 1.26777000  | -1.85537700 | -0.16875800 |
| H  | 0.41887300  | -1.18049700 | -0.26226800 |
| C  | 5.14216800  | 1.69862700  | 0.24252600  |
| C  | 5.01949000  | 2.43644400  | -0.96477100 |
| C  | 6.39690600  | 1.72914100  | 0.91137200  |
| C  | 6.09495500  | 3.15890300  | -1.46319500 |
| H  | 4.09135600  | 2.43739900  | -1.51732900 |
| C  | 7.46623300  | 2.45534100  | 0.40965800  |
| H  | 6.51066500  | 1.16904200  | 1.83520100  |
| C  | 7.31919900  | 3.17582700  | -0.78194500 |
| H  | 5.98356900  | 3.71356600  | -2.38983900 |
| H  | 8.41369000  | 2.46323300  | 0.93956200  |
| H  | 8.15349500  | 3.74606700  | -1.17954300 |
| C  | 1.18127300  | -3.00751200 | -1.03009300 |
| C  | 2.19243700  | -3.98569700 | -1.22472300 |
| C  | -0.03454600 | -3.15332000 | -1.75472000 |
| C  | 1.98508000  | -5.04963200 | -2.09103100 |
| H  | 3.14304600  | -3.90245900 | -0.71711400 |
| C  | -0.23749900 | -4.22310000 | -2.61273300 |
| H  | -0.81136600 | -2.40597700 | -1.62101100 |
| C  | 0.77259600  | -5.17820900 | -2.78312400 |
| H  | 2.77038200  | -5.78538900 | -2.23493200 |
| H  | -1.17466600 | -4.31689800 | -3.15243300 |
| H  | 0.61965500  | -6.01684000 | -3.45592100 |
| C  | 2.03804700  | 1.37634100  | -0.59162700 |
| H  | 2.14310000  | 2.46752800  | -0.53680600 |
| H  | 2.43719100  | 1.05905600  | -1.56127100 |
| H  | 0.97159500  | 1.14335200  | -0.56658000 |
| C  | 3.40442000  | -2.29358400 | 1.19861600  |
| H  | 3.85275000  | -1.87506500 | 2.10128100  |
| H  | 3.11065600  | -3.32692800 | 1.41500400  |
| H  | 4.17109200  | -2.32751200 | 0.41680600  |
| O  | 2.42612700  | -0.08709500 | 2.80814100  |
| H  | 0.89531400  | 0.11923700  | 1.42598400  |
| C  | 1.59151000  | -0.78412500 | 3.73318700  |
| H  | 2.02045700  | -0.61694800 | 4.72293900  |
| H  | 0.56583500  | -0.39345100 | 3.70734400  |
| H  | 1.56693300  | -1.86238900 | 3.52749700  |
| O  | -1.15044500 | 0.29236100  | -0.03379400 |
| C  | -2.38485300 | 0.53019700  | 0.00771900  |
| C  | -3.06036600 | 1.34358300  | -0.99376700 |
| C  | -3.24971300 | 0.01357600  | 1.05895700  |
| C  | -4.40761300 | 1.60555300  | -0.95040300 |
| C  | -4.59736100 | 0.27332700  | 1.10511200  |
| C  | -5.27877600 | 1.08979100  | 0.10309900  |
| O  | -6.50391700 | 1.32616800  | 0.14352300  |
| Cl | -2.46566200 | -0.97052700 | 2.27433900  |

|    |             |             |             |
|----|-------------|-------------|-------------|
| Cl | -5.61210600 | -0.35975800 | 2.37775000  |
| Cl | -5.19252900 | 2.58477000  | -2.16502400 |
| Cl | -2.04615400 | 1.97373400  | -2.27172700 |

**2\_A for X=Cl, X'=Cl**

E(B3LYP/BS1) = -3070.38915 au

H(B3LYP/BS1) = -3069.939976 au

G(B3LYP/BS1) = -3070.038952 au

E(M06-2X/BS2//B3LYP/BS1) = -3070.285527 au

|   |             |             |             |
|---|-------------|-------------|-------------|
| C | -0.90470100 | 0.18824100  | 1.81248500  |
| C | -2.24570700 | -0.34543100 | 1.26681200  |
| C | -0.36971600 | 1.46866100  | 1.15747500  |
| C | -2.93889400 | 0.33885700  | 0.33404800  |
| H | -2.51259500 | 1.27097400  | -0.02302900 |
| C | -0.01303500 | 1.44299800  | -0.14489900 |
| H | -0.17409400 | 0.51630900  | -0.68969400 |
| C | -4.25322000 | 0.03686100  | -0.26047600 |
| C | -4.77253300 | -1.26045400 | -0.43660100 |
| C | -5.02597600 | 1.12085800  | -0.72554400 |
| C | -6.02216900 | -1.45832000 | -1.02555200 |
| H | -4.18745600 | -2.12328000 | -0.14122200 |
| C | -6.27779000 | 0.92442300  | -1.30394900 |
| H | -4.63494700 | 2.13018300  | -0.62028000 |
| C | -6.78456600 | -0.36960100 | -1.45387000 |
| H | -6.39714000 | -2.47005300 | -1.15590200 |
| H | -6.85535600 | 1.78002800  | -1.64365600 |
| H | -7.75807700 | -0.52771100 | -1.90974300 |
| C | 0.52199000  | 2.52324200  | -0.99179100 |
| C | 1.34081300  | 3.56541000  | -0.51616700 |
| C | 0.23508100  | 2.48694600  | -2.37137300 |
| C | 1.82391200  | 4.54687100  | -1.38236800 |
| H | 1.63011300  | 3.59267100  | 0.52834000  |
| C | 0.70947300  | 3.47233200  | -3.23413500 |
| H | -0.37576200 | 1.67699200  | -2.76303600 |
| C | 1.50451200  | 4.51114100  | -2.74147000 |
| H | 2.45982500  | 5.33752800  | -0.99325700 |
| H | 0.46446700  | 3.42668500  | -4.29182900 |
| H | 1.88134700  | 5.27786300  | -3.41270200 |
| C | -2.76512900 | -1.57896700 | 1.97407600  |
| H | -3.85366100 | -1.53663100 | 2.07788700  |
| H | -2.51890300 | -2.49896900 | 1.43549200  |
| H | -2.32830400 | -1.65579200 | 2.97054900  |
| C | -0.41039600 | 2.72763800  | 1.99259700  |
| H | -1.24656100 | 2.68664300  | 2.69509600  |
| H | 0.50140400  | 2.87564300  | 2.58437400  |
| H | -0.53134300 | 3.60800700  | 1.35624800  |
| O | -1.17439700 | 0.33903400  | 3.17847900  |
| H | 3.98455100  | -2.52835100 | -2.51977100 |
| C | -0.13812600 | 0.36502300  | 4.16306900  |
| H | 0.47206000  | -0.53843800 | 4.11634300  |
| H | 0.50368500  | 1.24506400  | 4.07194300  |
| H | -0.66461300 | 0.40469800  | 5.11939700  |

|    |             |             |             |
|----|-------------|-------------|-------------|
| O  | 4.25401500  | -1.90097900 | -1.82452000 |
| C  | 3.21779200  | -1.68403100 | -0.98954800 |
| C  | 3.40528400  | -0.81135300 | 0.09148100  |
| C  | 1.96446900  | -2.29383600 | -1.13776400 |
| C  | 2.36333900  | -0.54822800 | 0.98809300  |
| C  | 0.91980700  | -2.02642000 | -0.24627500 |
| C  | 1.08357200  | -1.12742900 | 0.82945200  |
| O  | 0.09252200  | -0.95826600 | 1.74310700  |
| Cl | 1.76527400  | -3.40290800 | -2.47703900 |
| Cl | -0.60251400 | -2.83702400 | -0.46471700 |
| Cl | 2.66858600  | 0.49522100  | 2.34385200  |
| Cl | 4.97781400  | -0.08358200 | 0.27702700  |

**TS\_A for X=CN, X'=H**

E(B3LYP/BS1) = -1416.471388 au

H(B3LYP/BS1) = -1415.994569 au

G(B3LYP/BS1) = -1416.089469 au

E(M06-2X/BS2//B3LYP/BS1) = -1416.304453 au

|   |             |             |             |
|---|-------------|-------------|-------------|
| C | 1.11097100  | 2.10081000  | 0.18535600  |
| C | 2.29354800  | 1.25773000  | -0.19740600 |
| C | 0.09707800  | 1.64655700  | 1.14309100  |
| C | 2.75719700  | 0.31130400  | 0.65767000  |
| H | 2.27836900  | 0.24938300  | 1.63275500  |
| C | -0.37867800 | 0.35176100  | 1.00115900  |
| H | 0.17409200  | -0.27110900 | 0.30581300  |
| C | 3.87215900  | -0.62512400 | 0.47594200  |
| C | 4.21325100  | -1.19786800 | -0.76588700 |
| C | 4.60879900  | -1.01648100 | 1.61311500  |
| C | 5.27001200  | -2.10185800 | -0.86644300 |
| H | 3.62399900  | -0.96793900 | -1.64682900 |
| C | 5.67130000  | -1.91019200 | 1.50885600  |
| H | 4.34391000  | -0.60289800 | 2.58313700  |
| C | 6.00923300  | -2.45392800 | 0.26575000  |
| H | 5.51044700  | -2.53968800 | -1.83130600 |
| H | 6.23184500  | -2.18878300 | 2.39690600  |
| H | 6.83348500  | -3.15678700 | 0.18293800  |
| C | -1.43987000 | -0.36111700 | 1.68570900  |
| C | -2.49262600 | 0.23887300  | 2.41924400  |
| C | -1.45727400 | -1.77191900 | 1.54479500  |
| C | -3.48664100 | -0.54145700 | 3.00182400  |
| H | -2.55300000 | 1.31440800  | 2.51406600  |
| C | -2.44770700 | -2.54706900 | 2.13627000  |
| H | -0.66778000 | -2.25382300 | 0.97452600  |
| C | -3.46836300 | -1.93336100 | 2.86861900  |
| H | -4.28773000 | -0.05976100 | 3.55473500  |
| H | -2.43059800 | -3.62644200 | 2.01957000  |
| H | -4.24894700 | -2.53434400 | 3.32580400  |
| C | 2.93070200  | 1.61915200  | -1.51785500 |
| H | 2.41636700  | 1.13074900  | -2.35518300 |
| H | 2.86325000  | 2.69926100  | -1.67826600 |
| H | 3.98365100  | 1.33125500  | -1.55197000 |
| C | -0.41093400 | 2.62566800  | 2.17058100  |

|   |             |             |             |
|---|-------------|-------------|-------------|
| H | 0.33543200  | 3.40400900  | 2.34342000  |
| H | -1.34384900 | 3.11805700  | 1.87026700  |
| H | -0.60434000 | 2.11096100  | 3.11599200  |
| O | 1.48764900  | 3.44406200  | 0.23772000  |
| H | 0.34397500  | 1.98460100  | -0.92568100 |
| C | 0.58973600  | 4.43743300  | -0.27804100 |
| H | 1.06968800  | 5.39737800  | -0.08065400 |
| H | 0.45235800  | 4.30769500  | -1.35554000 |
| H | -0.38569600 | 4.41508200  | 0.21742800  |
| O | -0.42453000 | 1.84813000  | -1.90115400 |
| C | -1.47485700 | 1.15043000  | -1.59009100 |
| C | -1.51996400 | -0.26420000 | -1.88825300 |
| C | -2.65207200 | 1.75844900  | -1.02725600 |
| C | -2.65073500 | -1.01587000 | -1.61200900 |
| C | -3.76693600 | 1.03500800  | -0.74080000 |
| C | -3.85075600 | -0.40278300 | -0.99029000 |
| O | -4.85185800 | -1.07875600 | -0.72234300 |
| C | -0.36328000 | -0.85459100 | -2.49183800 |
| C | -2.71981400 | -2.40428300 | -1.92580600 |
| N | 0.58195600  | -1.33049100 | -2.97484100 |
| N | -2.78552000 | -3.53878500 | -2.17912900 |
| H | -4.65141000 | 1.50149500  | -0.31887100 |
| H | -2.61352400 | 2.82824400  | -0.84509000 |

**TS\_B for X=CN, X'=H**

E(B3LYP/BS1) = -1416.458315 au

H(B3LYP/BS1) = -1415.981012 au

G(B3LYP/BS1) = -1416.077963 au

E(M06-2X/BS2//B3LYP/BS1) = -1416.294668 au

|   |             |             |             |
|---|-------------|-------------|-------------|
| C | 0.26049400  | 0.83744800  | -1.51590100 |
| C | -1.03027600 | 0.15281700  | -1.62954000 |
| C | 1.52712400  | 0.00854500  | -1.39921300 |
| C | -1.21764000 | -0.93161700 | -0.80156500 |
| H | -0.34109500 | -1.24049300 | -0.23677900 |
| C | 2.19832700  | -0.16243200 | -0.24591900 |
| H | 1.77549000  | 0.27358800  | 0.65355400  |
| C | -2.35942900 | -1.81002800 | -0.60305900 |
| C | -3.68568800 | -1.54558600 | -1.01715000 |
| C | -2.10996300 | -3.02280900 | 0.08331800  |
| C | -4.69880600 | -2.46999100 | -0.77756800 |
| H | -3.93756400 | -0.60880400 | -1.49288500 |
| C | -3.12288100 | -3.94685100 | 0.31068700  |
| H | -1.10123500 | -3.23543400 | 0.42731500  |
| C | -4.42361300 | -3.67438800 | -0.12382200 |
| H | -5.71188900 | -2.24556800 | -1.09832300 |
| H | -2.90242500 | -4.87450500 | 0.83055100  |
| H | -5.21982100 | -4.39131700 | 0.05498500  |
| C | 3.43850400  | -0.92377900 | -0.00146000 |
| C | 4.51788900  | -0.95667700 | -0.90314000 |
| C | 3.57083500  | -1.61045900 | 1.22076400  |
| C | 5.67401800  | -1.67886800 | -0.60466400 |
| H | 4.46941600  | -0.38877100 | -1.82617800 |

|   |             |             |             |
|---|-------------|-------------|-------------|
| C | 4.72184900  | -2.33880900 | 1.51399800  |
| H | 2.75615300  | -1.57702100 | 1.93978600  |
| C | 5.77782100  | -2.37888700 | 0.59917500  |
| H | 6.49870100  | -1.68575800 | -1.31202300 |
| H | 4.79746000  | -2.87022400 | 2.45864000  |
| H | 6.67876100  | -2.94087200 | 0.82872400  |
| C | -2.06547600 | 0.72008600  | -2.56853300 |
| H | -2.60600900 | -0.09032100 | -3.06568700 |
| H | -2.80389900 | 1.33763900  | -2.04297300 |
| H | -1.59401200 | 1.34156800  | -3.33023100 |
| C | 1.90217400  | -0.62295400 | -2.72821500 |
| H | 1.00516600  | -0.98596100 | -3.24051300 |
| H | 2.39227800  | 0.08808100  | -3.40460700 |
| H | 2.57932200  | -1.46673700 | -2.58018800 |
| O | 0.35265800  | 1.92813400  | -2.33062000 |
| H | 0.01500500  | 1.44973400  | -0.19492600 |
| C | 1.53298600  | 2.74872200  | -2.25039900 |
| H | 2.42266600  | 2.19987800  | -2.56799500 |
| H | 1.34694900  | 3.58156600  | -2.92794700 |
| H | 1.67112800  | 3.12225900  | -1.23181000 |
| O | 1.48886500  | 3.19770700  | 1.52690500  |
| C | 0.68426300  | 2.30597100  | 1.74451500  |
| C | -0.53945400 | 2.11969900  | 0.83637100  |
| C | 0.85000800  | 1.33220900  | 2.83666600  |
| C | -1.62833500 | 1.32086100  | 1.34524800  |
| C | -0.10686200 | 0.43561900  | 3.13499400  |
| C | -1.42643700 | 0.38938300  | 2.44623900  |
| O | -2.30437300 | -0.37779100 | 2.85599300  |
| C | -0.90757300 | 3.34956400  | 0.15240300  |
| C | -2.94099000 | 1.46207700  | 0.83824300  |
| N | -1.20657300 | 4.32900800  | -0.39504900 |
| N | -4.02812800 | 1.59262100  | 0.43083500  |
| H | 1.78104500  | 1.39702400  | 3.39190100  |
| H | 0.01691900  | -0.27855300 | 3.94403200  |

**TS\_D for X=CN, X'=H**

E(B3LYP/BS1) = -1416.459557 au

H(B3LYP/BS1) = -1415.984027 au

G(B3LYP/BS1) = -1416.086465 au

E(M06-2X/BS2//B3LYP/BS1) = -1416.280033 au

|   |            |             |             |
|---|------------|-------------|-------------|
| C | 0.91485800 | 0.05114000  | 1.88794400  |
| C | 1.82781500 | 1.09143300  | 1.36088900  |
| C | 1.07815400 | -1.38937700 | 1.49322700  |
| C | 2.76219100 | 0.76751500  | 0.40102300  |
| H | 2.91013000 | -0.29263800 | 0.21559000  |
| C | 0.78850300 | -1.72964500 | 0.20587000  |
| H | 0.44536600 | -0.91627400 | -0.43247100 |
| C | 3.64770000 | 1.62451200  | -0.36782200 |
| C | 3.39515600 | 2.98340100  | -0.67062300 |
| C | 4.82423700 | 1.03684300  | -0.89342700 |
| C | 4.29461400 | 3.71891700  | -1.43584200 |
| H | 2.47744000 | 3.45358500  | -0.34008000 |



|   |             |             |             |
|---|-------------|-------------|-------------|
| C | 5.72722000  | 1.77903900  | -1.64490400 |
| H | 5.02331900  | -0.01230900 | -0.69120300 |
| C | 5.46739200  | 3.12671200  | -1.91674600 |
| H | 4.07718200  | 4.75785500  | -1.66597100 |
| H | 6.62902900  | 1.30915700  | -2.02633200 |
| H | 6.16728500  | 3.70814500  | -2.50989600 |
| C | 0.89767500  | -3.00451400 | -0.50305200 |
| C | 0.98115900  | -4.27304100 | 0.11132700  |
| C | 0.89063900  | -2.95621500 | -1.91541300 |
| C | 1.07694500  | -5.43117400 | -0.65748900 |
| H | 0.93955900  | -4.36504600 | 1.18863700  |
| C | 0.99715900  | -4.11325700 | -2.68032200 |
| H | 0.80832300  | -1.99125600 | -2.40913400 |
| C | 1.09411300  | -5.35874600 | -2.05294100 |
| H | 1.13198300  | -6.39679500 | -0.16277000 |
| H | 0.99825000  | -4.04553800 | -3.76446000 |
| H | 1.17159900  | -6.26540800 | -2.64614000 |
| C | 1.62579900  | 2.48469300  | 1.90392200  |
| H | 2.54645700  | 3.06898600  | 1.85032000  |
| H | 0.84950100  | 3.01603600  | 1.33880100  |
| H | 1.29787500  | 2.43816600  | 2.94321800  |
| C | 1.59755200  | -2.32788600 | 2.55741300  |
| H | 2.03351100  | -1.76130500 | 3.38318100  |
| H | 0.81175400  | -2.96735500 | 2.97855200  |
| H | 2.36444700  | -2.98939900 | 2.14124100  |
| O | 0.63560100  | 0.26145100  | 3.24168900  |
| H | -0.13756200 | 0.45620100  | 1.25067100  |
| C | -0.61611700 | -0.22111800 | 3.73731600  |
| H | -0.59343300 | -0.06277800 | 4.81661900  |
| H | -1.44476500 | 0.34961200  | 3.30358900  |
| H | -0.75783200 | -1.28760700 | 3.53329700  |
| O | -1.14106300 | 1.17996300  | 0.63209200  |
| C | -2.29137300 | 0.68471100  | 0.31677200  |
| C | -3.24981100 | 1.54084200  | -0.33196500 |
| C | -2.67566000 | -0.67829300 | 0.57299200  |
| C | -4.51330100 | 1.06191900  | -0.69484700 |
| C | -3.90382500 | -1.15117800 | 0.22164800  |
| C | -4.90735200 | -0.32295500 | -0.43211400 |
| O | -6.03302500 | -0.76012700 | -0.75237300 |
| C | -2.86938100 | 2.89304400  | -0.59002300 |
| C | -5.46620200 | 1.90474600  | -1.33451800 |
| N | -2.56317500 | 3.99576600  | -0.80248500 |
| N | -6.24883800 | 2.59049300  | -1.85794000 |
| H | -1.94978600 | -1.32865700 | 1.04866600  |
| H | -4.18280200 | -2.18188900 | 0.41802000  |

**2\_D for X=CN, X'=H**

E(B3LYP/BS1) = -1416.471294 au

H(B3LYP/BS1) = -1415.989476 au

G(B3LYP/BS1) = -1416.093203 au

E(M06-2X/BS2//B3LYP/BS1) = -1416.286701 au

|   |            |             |            |
|---|------------|-------------|------------|
| C | 2.58478500 | -0.64753400 | 1.89379300 |
|---|------------|-------------|------------|

|   |             |             |             |
|---|-------------|-------------|-------------|
| C | 2.16577500  | 0.66752400  | 1.24976700  |
| C | 2.62548200  | -1.59163200 | 0.68788100  |
| C | 3.10694200  | 1.33070900  | 0.49320700  |
| H | 4.11202900  | 0.91768600  | 0.52096300  |
| C | 1.41081600  | -2.10658900 | 0.26821100  |
| H | 0.54219000  | -1.78946900 | 0.84262400  |
| C | 2.99391100  | 2.55707700  | -0.26722300 |
| C | 1.78647400  | 3.04737500  | -0.82597100 |
| C | 4.18771700  | 3.28517400  | -0.50775600 |
| C | 1.78001300  | 4.22902600  | -1.55691600 |
| H | 0.86395300  | 2.48651700  | -0.73465900 |
| C | 4.17013900  | 4.47399000  | -1.22338900 |
| H | 5.12409600  | 2.90777700  | -0.10600300 |
| C | 2.96326400  | 4.95347300  | -1.74796300 |
| H | 0.84920500  | 4.58356700  | -1.98911300 |
| H | 5.09171800  | 5.02557600  | -1.38242700 |
| H | 2.94752800  | 5.87894600  | -2.31611600 |
| C | 1.07418200  | -3.00987500 | -0.80334800 |
| C | 1.99152600  | -3.63732100 | -1.69005600 |
| C | -0.31162600 | -3.29660900 | -0.96540000 |
| C | 1.53824300  | -4.49537700 | -2.68077200 |
| H | 3.05360300  | -3.46146000 | -1.60363700 |
| C | -0.75464500 | -4.15349800 | -1.96155100 |
| H | -1.02045800 | -2.81012100 | -0.30148200 |
| C | 0.16802900  | -4.75804200 | -2.82367800 |
| H | 2.25208100  | -4.96730000 | -3.34889700 |
| H | -1.81598900 | -4.35353900 | -2.07210400 |
| H | -0.17544200 | -5.43162200 | -3.60328300 |
| C | 0.77184800  | 1.13278600  | 1.54099400  |
| H | 0.64986700  | 2.19903400  | 1.34658400  |
| H | 0.00978300  | 0.59364700  | 0.96127600  |
| H | 0.54563500  | 0.94363500  | 2.59757700  |
| C | 3.95851700  | -1.84602700 | 0.04618600  |
| H | 4.74551300  | -1.29036000 | 0.55711700  |
| H | 4.20945300  | -2.91196800 | 0.12144900  |
| H | 3.96545100  | -1.58160800 | -1.01602200 |
| O | 3.81492700  | -0.50736900 | 2.56509000  |
| H | 1.80338200  | -0.97176300 | 2.59345600  |
| C | 4.12014900  | -1.60262300 | 3.42897600  |
| H | 5.06231600  | -1.35398300 | 3.92086500  |
| H | 3.33603300  | -1.73358000 | 4.18657700  |
| H | 4.24065200  | -2.54231100 | 2.87427900  |
| O | -1.73520400 | -0.87016100 | 0.68481400  |
| C | -2.95138700 | -0.54352800 | 0.71343600  |
| C | -3.44322000 | 0.67443400  | 0.08822100  |
| C | -3.95441400 | -1.36920400 | 1.37537300  |
| C | -4.80323300 | 1.02639800  | 0.13100700  |
| C | -5.26794000 | -1.03058900 | 1.41906500  |
| C | -5.79065600 | 0.18749300  | 0.80373800  |
| O | -7.00377700 | 0.49042500  | 0.84968700  |
| C | -2.49085200 | 1.49705500  | -0.57673200 |

|   |             |             |             |
|---|-------------|-------------|-------------|
| C | -5.27419500 | 2.21980300  | -0.48442900 |
| N | -1.70365900 | 2.16455100  | -1.11999200 |
| N | -5.66011800 | 3.19802400  | -0.98834600 |
| H | -5.99661400 | -1.66116800 | 1.92153300  |
| H | -3.59097400 | -2.28053600 | 1.84306700  |

## 2\_A for X=CN, X'=H

E(B3LYP/BS1) = -1416.533224 au

H(B3LYP/BS1) = -1416.049514 au

G(B3LYP/BS1) = -1416.146407 au

E(M06-2X/BS2//B3LYP/BS1) = -1416.387153 au

|   |             |             |             |
|---|-------------|-------------|-------------|
| C | -0.51954700 | 0.17487800  | 1.52548200  |
| C | 0.32916100  | -1.09110800 | 1.33833200  |
| C | -1.96191600 | 0.09408900  | 1.01031000  |
| C | -0.06887900 | -2.03449100 | 0.46094700  |
| H | -1.03033700 | -1.88487700 | -0.02687800 |
| C | -2.38119100 | 0.87197600  | -0.00681600 |
| H | -1.63784700 | 1.51322700  | -0.47205900 |
| C | 0.59642600  | -3.29102100 | 0.07138100  |
| C | 1.99289400  | -3.44849800 | -0.01224200 |
| C | -0.21465800 | -4.38566100 | -0.28841700 |
| C | 2.55230800  | -4.66402400 | -0.40812500 |
| H | 2.64586800  | -2.60958700 | 0.20054700  |
| C | 0.34410800  | -5.60220600 | -0.67396700 |
| H | -1.29603400 | -4.27668500 | -0.25342900 |
| C | 1.73307800  | -5.74777400 | -0.73167300 |
| H | 3.63285800  | -4.76029600 | -0.47133000 |
| H | -0.30351000 | -6.43463300 | -0.93549200 |
| H | 2.17205500  | -6.69328200 | -1.03780500 |
| C | -3.71391000 | 0.97490900  | -0.62962100 |
| C | -4.93044300 | 0.75948300  | 0.04615600  |
| C | -3.77398000 | 1.35535400  | -1.98575100 |
| C | -6.15075900 | 0.88889300  | -0.61849900 |
| H | -4.93070400 | 0.52218200  | 1.10335900  |
| C | -4.99154700 | 1.47533100  | -2.65161000 |
| H | -2.84725300 | 1.55007200  | -2.52044900 |
| C | -6.18845700 | 1.23781000  | -1.97003600 |
| H | -7.07608500 | 0.72379100  | -0.07306300 |
| H | -5.00721600 | 1.76026100  | -3.70015000 |
| H | -7.14056300 | 1.33580300  | -2.48414300 |
| C | 1.58514500  | -1.16246000 | 2.17323400  |
| H | 1.90361200  | -2.19787300 | 2.31605500  |
| H | 2.41912600  | -0.62247200 | 1.70453800  |
| H | 1.41542200  | -0.70726400 | 3.15033000  |
| C | -2.83159000 | -0.87135900 | 1.78578300  |
| H | -2.23419900 | -1.67636700 | 2.21953500  |
| H | -3.34261300 | -0.37091500 | 2.61835700  |
| H | -3.59988100 | -1.31644000 | 1.14697600  |
| O | -0.53530700 | 0.43611000  | 2.90640000  |
| H | 3.81323300  | 0.97498300  | -3.80259400 |
| C | -1.11379200 | 1.67419600  | 3.33432100  |
| H | -0.48111200 | 2.51892300  | 3.04836500  |

|   |             |            |             |
|---|-------------|------------|-------------|
| H | -2.11968300 | 1.81815300 | 2.92483500  |
| H | -1.16987000 | 1.60961300 | 4.42259100  |
| O | 4.05239200  | 1.49584800 | -3.01780200 |
| C | 3.07739900  | 1.40254700 | -2.08384100 |
| C | 3.26668400  | 2.10041600 | -0.87931300 |
| C | 1.90220900  | 0.66060200 | -2.26565600 |
| C | 2.27953800  | 2.02733300 | 0.13886600  |
| C | 0.93054000  | 0.60530700 | -1.27575200 |
| C | 1.10534300  | 1.27844400 | -0.05615100 |
| O | 0.16844400  | 1.34154400 | 0.92542600  |
| C | 4.45334700  | 2.87039400 | -0.68866800 |
| C | 2.46556200  | 2.72688300 | 1.37154800  |
| N | 5.42075400  | 3.49787800 | -0.53196000 |
| N | 2.62601000  | 3.29841600 | 2.37222500  |
| H | 0.02087500  | 0.04653100 | -1.45119900 |
| H | 1.74384200  | 0.13361900 | -3.20227900 |

**TS\_A for X=CN, X'=CN**

E(B3LYP/BS1) = -1600.947897 au

H(B3LYP/BS1) = -1600.470816 au

G(B3LYP/BS1) = -1600.575068 au

E(M06-2X/BS2//B3LYP/BS1) = -1600.773626 au

|   |             |             |             |
|---|-------------|-------------|-------------|
| C | 1.19361900  | 2.09886600  | 0.19479400  |
| C | 2.46158900  | 1.38323000  | -0.17589300 |
| C | 0.25709400  | 1.55127000  | 1.19494100  |
| C | 3.02059200  | 0.49979900  | 0.69543200  |
| H | 2.54888600  | 0.40503800  | 1.67110900  |
| C | -0.06840500 | 0.20726100  | 1.07561300  |
| H | 0.52208000  | -0.34561300 | 0.35261000  |
| C | 4.23260200  | -0.30422100 | 0.53722800  |
| C | 4.67391500  | -0.81970600 | -0.69961900 |
| C | 4.97348300  | -0.62367400 | 1.69550700  |
| C | 5.82827200  | -1.59644300 | -0.77306100 |
| H | 4.09044800  | -0.64800600 | -1.59708900 |
| C | 6.13353300  | -1.38798600 | 1.61718300  |
| H | 4.63321900  | -0.25427900 | 2.65960800  |
| C | 6.56789800  | -1.87443500 | 0.37993300  |
| H | 6.14700400  | -1.99333800 | -1.73269300 |
| H | 6.69556000  | -1.61166400 | 2.51942200  |
| H | 7.46927800  | -2.47740200 | 0.31700600  |
| C | -1.00645500 | -0.62534200 | 1.79772900  |
| C | -2.09443100 | -0.15305000 | 2.57462500  |
| C | -0.85555200 | -2.02913700 | 1.65231900  |
| C | -2.96761300 | -1.04647600 | 3.18429300  |
| H | -2.27766100 | 0.90814500  | 2.67801800  |
| C | -1.72525800 | -2.91641800 | 2.27404100  |
| H | -0.02963400 | -2.41205400 | 1.05957200  |
| C | -2.78664200 | -2.42725900 | 3.04146800  |
| H | -3.80141500 | -0.66602200 | 3.76614000  |
| H | -1.58313100 | -3.98598500 | 2.15511400  |
| H | -3.47499000 | -3.11699800 | 3.52057500  |
| C | 3.06537900  | 1.80036400  | -1.49419900 |

|   |             |             |             |
|---|-------------|-------------|-------------|
| H | 4.14819600  | 1.65883900  | -1.50268200 |
| H | 2.64146800  | 1.22561200  | -2.32730100 |
| H | 2.85416900  | 2.85675400  | -1.68176400 |
| C | -0.31122100 | 2.48256200  | 2.23049300  |
| H | 0.36548000  | 3.32707500  | 2.37824500  |
| H | -1.29128700 | 2.88791700  | 1.94891200  |
| H | -0.43484600 | 1.95899200  | 3.18244400  |
| O | 1.42713800  | 3.47185500  | 0.22317600  |
| H | 0.46017200  | 1.88385800  | -0.85790900 |
| C | 0.42340200  | 4.37205700  | -0.27387600 |
| H | 0.81318600  | 5.37315300  | -0.08415600 |
| H | 0.28382200  | 4.22841000  | -1.34942200 |
| H | -0.53482800 | 4.25200200  | 0.23626600  |
| O | -0.36164200 | 1.65388500  | -1.88826100 |
| C | -1.21467900 | 0.72598000  | -1.62497600 |
| C | -0.95149900 | -0.65359000 | -1.97957000 |
| C | -2.49643400 | 1.01894900  | -1.02209800 |
| C | -1.85980300 | -1.66243900 | -1.71153800 |
| C | -3.41888400 | 0.02425500  | -0.74309700 |
| C | -3.15320000 | -1.39338300 | -1.05031400 |
| O | -3.95936400 | -2.28758600 | -0.79183100 |
| C | 0.29038900  | -0.93505000 | -2.63440100 |
| C | -1.59932900 | -3.01585400 | -2.07792200 |
| N | 1.30068200  | -1.16144500 | -3.16348500 |
| N | -1.38932900 | -4.12146200 | -2.37287000 |
| C | -4.68360900 | 0.32311200  | -0.15651900 |
| N | -5.71720200 | 0.56129200  | 0.32163600  |
| C | -2.79166200 | 2.38562800  | -0.71965900 |
| N | -3.03940700 | 3.49120400  | -0.45811600 |

**TS\_B** for X=CN, X'=CN

E(B3LYP/BS1) = -1600.92925 au

H(B3LYP/BS1) = -1600.451565 au

G(B3LYP/BS1) = -1600.556842 au

E(M06-2X/BS2//B3LYP/BS1) = -1600.759618 au

|   |             |             |             |
|---|-------------|-------------|-------------|
| C | -3.23148800 | -1.91463200 | 0.43329900  |
| C | -2.00661700 | -2.39434300 | -0.14622300 |
| C | -3.83326300 | -0.61058900 | 0.18016000  |
| C | -1.51131900 | -1.71501800 | -1.24177300 |
| H | -2.15979600 | -0.96138800 | -1.67755500 |
| C | -3.01366600 | 0.48587200  | 0.25196200  |
| H | -1.97260000 | 0.29466800  | 0.50385700  |
| C | -0.26421100 | -1.89423300 | -1.95617400 |
| C | 0.90155700  | -2.46811300 | -1.39694800 |
| C | -0.20575700 | -1.41399100 | -3.28610400 |
| C | 2.06411800  | -2.57881200 | -2.15233600 |
| H | 0.91132800  | -2.78451900 | -0.36169700 |
| C | 0.95087100  | -1.54869700 | -4.04420000 |
| H | -1.08578100 | -0.94608500 | -3.71899100 |
| C | 2.08876700  | -2.13361100 | -3.47844100 |
| H | 2.95631300  | -3.00082200 | -1.70009300 |

|   |             |             |             |
|---|-------------|-------------|-------------|
| H | 0.97307600  | -1.18885900 | -5.06830600 |
| H | 2.99821800  | -2.22817300 | -4.06476400 |
| C | -3.30275200 | 1.90487100  | 0.07746500  |
| C | -4.58853600 | 2.48311500  | -0.02828500 |
| C | -2.17854700 | 2.76162000  | 0.01471500  |
| C | -4.73335800 | 3.85561700  | -0.20823900 |
| H | -5.47941900 | 1.87634900  | 0.05315600  |
| C | -2.33067900 | 4.13077300  | -0.18084100 |
| H | -1.18558500 | 2.33339400  | 0.11982600  |
| C | -3.60899400 | 4.68307300  | -0.29432700 |
| H | -5.72940000 | 4.28276300  | -0.28024900 |
| H | -1.44993700 | 4.76336800  | -0.24040300 |
| H | -3.73144400 | 5.75256900  | -0.44094200 |
| C | -1.39734300 | -3.65673200 | 0.42039000  |
| H | -0.81662800 | -4.18336400 | -0.33922300 |
| H | -0.73812600 | -3.42975100 | 1.26738800  |
| H | -2.17978300 | -4.32739300 | 0.77978300  |
| C | -5.31121300 | -0.59727400 | -0.16537700 |
| H | -5.67087100 | -1.60264900 | -0.39747800 |
| H | -5.94026200 | -0.19015100 | 0.63365900  |
| H | -5.46888500 | 0.01481000  | -1.05897000 |
| O | -3.82845900 | -2.78341800 | 1.22606800  |
| H | 4.07423200  | -0.49416600 | 2.76696100  |
| C | -4.82920600 | -2.39884100 | 2.20002600  |
| H | -5.82459100 | -2.49811100 | 1.76612300  |
| H | -4.70688100 | -3.10493100 | 3.02059700  |
| H | -4.65215200 | -1.37750800 | 2.54082800  |
| O | 5.82884700  | 0.47703600  | 1.00342000  |
| C | 4.61558500  | 0.56448900  | 1.03431900  |
| C | 3.75862800  | -0.52707700 | 1.71119200  |
| C | 3.90293700  | 1.71827800  | 0.43885500  |
| C | 2.25003800  | -0.36569700 | 1.61254100  |
| C | 2.53627600  | 1.76289500  | 0.40040700  |
| C | 1.61863600  | 0.70989700  | 0.96484100  |
| O | 0.38322900  | 0.88883400  | 0.83292700  |
| C | 4.19338200  | -1.83394600 | 1.18362900  |
| C | 1.44928100  | -1.33810200 | 2.23852700  |
| N | 4.49801800  | -2.87105100 | 0.76036300  |
| N | 0.80279800  | -2.15937500 | 2.76721300  |
| C | 1.87834600  | 2.88176600  | -0.20770100 |
| C | 4.71872700  | 2.75224300  | -0.11679100 |
| N | 1.35810500  | 3.79758700  | -0.70001300 |
| N | 5.38805500  | 3.59162700  | -0.56388100 |

**TS\_D** for **X=CN, X'=CN**

E(B3LYP/BS1) = -1600.93064 au

H(B3LYP/BS1) = -1600.455444 au

G(B3LYP/BS1) = -1600.564444 au

E(M06-2X/BS2//B3LYP/BS1) = -1600.752056 au

|   |             |            |            |
|---|-------------|------------|------------|
| C | -1.25448900 | 0.88222600 | 1.97515100 |
| C | -2.34214700 | 0.02818700 | 1.45809300 |
| C | -0.75731700 | 2.07589500 | 1.23875300 |

|   |             |             |             |
|---|-------------|-------------|-------------|
| C | -2.97030500 | 0.33636600  | 0.27115100  |
| H | -2.75992300 | 1.31743800  | -0.14619700 |
| C | -0.32382800 | 1.90452500  | -0.04895400 |
| H | -0.37939700 | 0.88856100  | -0.43638500 |
| C | -3.94756500 | -0.42905300 | -0.48665100 |
| C | -4.04045100 | -1.84009700 | -0.47736500 |
| C | -4.82914500 | 0.28679300  | -1.33114000 |
| C | -4.99292900 | -2.49423300 | -1.25346300 |
| H | -3.34033000 | -2.42709100 | 0.10514800  |
| C | -5.78847300 | -0.36946400 | -2.09382600 |
| H | -4.75706400 | 1.37070300  | -1.36972500 |
| C | -5.87727000 | -1.76511800 | -2.05520800 |
| H | -5.04073200 | -3.57933700 | -1.23999500 |
| H | -6.46265200 | 0.20315500  | -2.72424700 |
| H | -6.62091200 | -2.28142900 | -2.65544800 |
| C | 0.17085400  | 2.85873900  | -1.03712600 |
| C | 0.66964900  | 4.14963300  | -0.75210300 |
| C | 0.17502500  | 2.43643900  | -2.38713500 |
| C | 1.12447700  | 4.97879300  | -1.77505600 |
| H | 0.73809700  | 4.49927500  | 0.26913100  |
| C | 0.61934300  | 3.27101400  | -3.40689300 |
| H | -0.18753800 | 1.44038600  | -2.62830700 |
| C | 1.09429000  | 4.55092400  | -3.10507100 |
| H | 1.51192100  | 5.96361900  | -1.52983700 |
| H | 0.60142500  | 2.92290500  | -4.43568900 |
| H | 1.44784700  | 5.20428800  | -3.89751200 |
| C | -2.71691700 | -1.16548500 | 2.30674100  |
| H | -3.75948100 | -1.44846300 | 2.14746900  |
| H | -2.08943400 | -2.03390100 | 2.07340900  |
| H | -2.57333600 | -0.93168000 | 3.36277600  |
| C | -0.77910600 | 3.39697600  | 1.96830200  |
| H | -1.43249400 | 3.33963100  | 2.84113800  |
| H | 0.21718500  | 3.69790300  | 2.31504600  |
| H | -1.14667800 | 4.18789500  | 1.30680500  |
| O | -1.30942400 | 0.99088600  | 3.36248400  |
| H | -0.22742300 | -0.05567500 | 1.73025300  |
| C | -0.08140300 | 1.08366500  | 4.09676400  |
| H | -0.37034900 | 1.28036800  | 5.13046200  |
| H | 0.46601100  | 0.13665400  | 4.04388700  |
| H | 0.55882400  | 1.89240200  | 3.73565400  |
| O | 0.42982400  | -1.11196100 | 1.65470500  |
| C | 1.44970600  | -1.34701100 | 0.89906700  |
| C | 1.48567300  | -2.61131700 | 0.20169200  |
| C | 2.57203300  | -0.46093000 | 0.73739800  |
| C | 2.54403700  | -2.96178000 | -0.62309500 |
| C | 3.64073900  | -0.80158400 | -0.08996000 |
| C | 3.68664500  | -2.06679600 | -0.82589100 |
| O | 4.63554300  | -2.36481300 | -1.56854200 |
| C | 0.36440200  | -3.48242100 | 0.37702600  |
| C | 2.56348000  | -4.20502400 | -1.32089000 |
| N | -0.54895100 | -4.18912000 | 0.51196800  |

|   |            |             |             |
|---|------------|-------------|-------------|
| N | 2.58025100 | -5.21898100 | -1.89064200 |
| C | 2.60883200 | 0.76100400  | 1.47696800  |
| C | 4.75787500 | 0.06947600  | -0.24735700 |
| N | 2.67130800 | 1.75286600  | 2.08069900  |
| N | 5.66947900 | 0.78058600  | -0.37724400 |

## 2\_D for X=CN, X'=CN

E(B3LYP/BS1) = -1600.957721 au

H(B3LYP/BS1) = -1600.475657 au

G(B3LYP/BS1) = -1600.589032 au

E(M06-2X/BS2//B3LYP/BS1) = -1600.767993 au

|   |             |             |             |
|---|-------------|-------------|-------------|
| C | -3.14684000 | -1.06542100 | -1.78377200 |
| C | -2.87207900 | 0.32579700  | -1.23510600 |
| C | -2.97024000 | -1.90117700 | -0.50996700 |
| C | -3.90715000 | 0.96318900  | -0.58224100 |
| H | -4.86529400 | 0.45180600  | -0.61662000 |
| C | -1.67456600 | -2.25957900 | -0.18388900 |
| H | -0.90899200 | -1.91621000 | -0.87745300 |
| C | -3.95125600 | 2.25216900  | 0.06767700  |
| C | -2.81767800 | 2.96425900  | 0.53819600  |
| C | -5.23475700 | 2.82139200  | 0.28412000  |
| C | -2.97022200 | 4.19316200  | 1.16653100  |
| H | -1.82289400 | 2.54702000  | 0.45422500  |
| C | -5.37801100 | 4.05615800  | 0.89927000  |
| H | -6.11353200 | 2.27871500  | -0.05306900 |
| C | -4.24379600 | 4.74994400  | 1.34072600  |
| H | -2.09177000 | 4.71755600  | 1.52983900  |
| H | -6.36725500 | 4.47944100  | 1.04382300  |
| H | -4.35263400 | 5.71382300  | 1.82915300  |
| C | -1.13702300 | -3.03676400 | 0.90329900  |
| C | -1.88474600 | -3.63139300 | 1.95634800  |
| C | 0.27380400  | -3.22862400 | 0.89799100  |
| C | -1.24773100 | -4.37277900 | 2.94002300  |
| H | -2.95747800 | -3.51578200 | 2.00741200  |
| C | 0.90153400  | -3.97251900 | 1.88519300  |
| H | 0.86219500  | -2.76249600 | 0.11464400  |
| C | 0.14338200  | -4.55006000 | 2.91064800  |
| H | -1.83313300 | -4.81963200 | 3.73764100  |
| H | 1.97877700  | -4.10377500 | 1.85971300  |
| H | 0.63091700  | -5.13469900 | 3.68516200  |
| C | -1.50202100 | 0.89177400  | -1.47829300 |
| H | -1.54847500 | 1.97756300  | -1.59505600 |
| H | -0.79200800 | 0.67925800  | -0.67040800 |
| H | -1.07620300 | 0.46835000  | -2.39326600 |
| C | -4.20079800 | -2.22941500 | 0.28486200  |
| H | -5.09211400 | -1.83045000 | -0.20029400 |
| H | -4.32038200 | -3.31821500 | 0.34862100  |
| H | -4.15084400 | -1.84327600 | 1.30798800  |
| O | -4.42800500 | -1.14711000 | -2.35654500 |
| H | -2.37788800 | -1.33160900 | -2.51984900 |
| C | -4.64835200 | -2.35551500 | -3.08502600 |
| H | -5.64978000 | -2.27928900 | -3.51219700 |



|   |             |             |             |
|---|-------------|-------------|-------------|
| H | -3.91326800 | -2.46422600 | -3.89347400 |
| H | -4.59924900 | -3.23958300 | -2.43629500 |
| O | 1.47308900  | -0.33461700 | -0.30076100 |
| C | 2.61221900  | 0.17586400  | -0.26723000 |
| C | 2.83399200  | 1.57183800  | 0.10768900  |
| C | 3.81762600  | -0.58445400 | -0.59743600 |
| C | 4.10054400  | 2.14129600  | 0.13458200  |
| C | 5.08436800  | -0.01720100 | -0.57021700 |
| C | 5.30625900  | 1.38375200  | -0.20563900 |
| O | 6.44113100  | 1.89389000  | -0.18368400 |
| C | 1.67691500  | 2.33314000  | 0.45185900  |
| C | 4.28748700  | 3.50778200  | 0.50160700  |
| N | 0.73140500  | 2.95026400  | 0.73457800  |
| C | 6.24341800  | -0.78274300 | -0.89870100 |
| C | 3.62922800  | -1.95553800 | -0.94689900 |
| N | 7.18626600  | -1.40986300 | -1.16719100 |
| N | 3.46549700  | -3.07466200 | -1.22274000 |
| N | 4.43548000  | 4.62260600  | 0.80112800  |

## 2\_A for X=CN, X'=CN

E(B3LYP/BS1) = -1600.992258 au

H(B3LYP/BS1) = -1600.508761 au

G(B3LYP/BS1) = -1600.613037 au

E(M06-2X/BS2//B3LYP/BS1) = -1600.842862 au

|   |             |             |             |
|---|-------------|-------------|-------------|
| C | -0.77888300 | 0.39502200  | 1.88494100  |
| C | -2.14108100 | -0.05132500 | 1.34771100  |
| C | -0.08726900 | 1.55573900  | 1.17432800  |
| C | -2.70738300 | 0.56957100  | 0.29071600  |
| H | -2.19078500 | 1.42485500  | -0.13257600 |
| C | 0.27247300  | 1.42030800  | -0.12280400 |
| H | 0.01849400  | 0.48607000  | -0.61734600 |
| C | -3.99504900 | 0.27504100  | -0.36367800 |
| C | -4.50048700 | -1.02703000 | -0.53983000 |
| C | -4.73363300 | 1.35092400  | -0.89452200 |
| C | -5.71493300 | -1.23748800 | -1.19408800 |
| H | -3.92433600 | -1.88030700 | -0.19823200 |
| C | -5.95216300 | 1.14091700  | -1.53652800 |
| H | -4.34640600 | 2.36171300  | -0.79004900 |
| C | -6.45024800 | -0.15662800 | -1.68580100 |
| H | -6.08288500 | -2.25139500 | -1.32650400 |
| H | -6.50970500 | 1.98807600  | -1.92674400 |
| H | -7.39671200 | -0.32417400 | -2.19240300 |
| C | 0.91602700  | 2.38892500  | -1.02540700 |
| C | 1.81796500  | 3.38438900  | -0.60266100 |
| C | 0.64352000  | 2.28375800  | -2.40453400 |
| C | 2.39811800  | 4.25725500  | -1.52330900 |
| H | 2.09778600  | 3.45631400  | 0.44189200  |
| C | 1.21368000  | 3.16388300  | -3.32096500 |
| H | -0.03203700 | 1.50640200  | -2.75335000 |
| C | 2.09251600  | 4.15842600  | -2.88247100 |
| H | 3.09793400  | 5.01234400  | -1.17605100 |
| H | 0.97853800  | 3.06962800  | -4.37750000 |

|   |             |             |             |
|---|-------------|-------------|-------------|
| H | 2.54455900  | 4.84202500  | -3.59560600 |
| C | -2.82210100 | -1.13315800 | 2.15654300  |
| H | -3.90388500 | -1.10420800 | 2.00813300  |
| H | -2.47206700 | -2.13258200 | 1.88270700  |
| H | -2.61336800 | -0.99112100 | 3.21858300  |
| C | 0.01417500  | 2.85550400  | 1.94058100  |
| H | -0.78427600 | 2.92350700  | 2.68323200  |
| H | 0.96712800  | 2.95990300  | 2.47351200  |
| H | -0.07133200 | 3.70552200  | 1.25842300  |
| O | -0.95723600 | 0.57678900  | 3.23816300  |
| H | 3.69179700  | -3.30206100 | -2.37540000 |
| C | 0.15042600  | 0.57521700  | 4.15013900  |
| H | 0.63428100  | -0.40361700 | 4.15588500  |
| H | 0.88636000  | 1.34610500  | 3.91853500  |
| H | -0.29277400 | 0.77488300  | 5.12704800  |
| O | 3.98772400  | -2.58683300 | -1.78288000 |
| C | 3.01587100  | -2.20983800 | -0.94099900 |
| C | 3.31868200  | -1.19026700 | -0.01881600 |
| C | 1.72895000  | -2.77739100 | -0.91566400 |
| C | 2.34749200  | -0.73744600 | 0.90187200  |
| C | 0.75540100  | -2.31594900 | 0.00189400  |
| C | 1.03477600  | -1.27819600 | 0.92181800  |
| O | 0.11719100  | -0.93267100 | 1.82703500  |
| C | 4.63334100  | -0.62953200 | -0.02668900 |
| C | 2.73846200  | 0.26322600  | 1.84461700  |
| N | 5.70225600  | -0.17255400 | -0.03306600 |
| N | 3.12029900  | 1.06356800  | 2.59694800  |
| C | -0.52630400 | -2.94758900 | 0.00141900  |
| C | 1.43782900  | -3.82679600 | -1.83913400 |
| N | -1.54375400 | -3.50922000 | -0.03676500 |
| N | 1.26423200  | -4.67364800 | -2.61808700 |

**Table 3**

**ortho-CN-Ph (TS\_A)**

E(B3LYP/BS1) = -2704.612335 au

H(B3LYP/BS1) = -2704.151802 au

G(B3LYP/BS1) = -2704.270963 au

E(M06-2X/BS2//B3LYP/BS1) = -2704.455576 au

|   |             |             |             |
|---|-------------|-------------|-------------|
| C | -0.25471800 | -0.19334500 | 0.96890300  |
| C | -1.09409800 | -1.42610900 | 0.95457600  |
| C | -0.96881400 | 1.14569000  | 0.96825100  |
| C | -2.22865900 | -1.40318100 | 0.20262500  |
| H | -2.47201500 | -0.47655300 | -0.31219500 |
| C | -0.99059100 | 1.90155000  | -0.14365000 |
| H | -0.48413200 | 1.54337200  | -1.03574700 |
| C | -3.25247900 | -2.44929000 | 0.06392300  |
| C | -2.99285000 | -3.78932500 | -0.30954700 |
| C | -4.61274200 | -2.09319000 | 0.25402400  |
| C | -4.03501200 | -4.72462200 | -0.44134100 |
| C | -5.64683100 | -3.03003000 | 0.12286800  |
| C | -5.35464700 | -4.34832700 | -0.21797100 |

|    |             |             |             |
|----|-------------|-------------|-------------|
| H  | -6.15306400 | -5.07478500 | -0.32137100 |
| C  | -1.68614200 | 3.19941300  | -0.31304500 |
| C  | -1.34765800 | 4.35602700  | 0.42114800  |
| C  | -2.69360300 | 3.33152100  | -1.29486900 |
| C  | -2.00218900 | 5.58009800  | 0.19609900  |
| C  | -3.34641800 | 4.55343700  | -1.51764900 |
| C  | -2.99947400 | 5.67479400  | -0.76867900 |
| H  | -3.50170500 | 6.62043500  | -0.94052100 |
| C  | -0.65351700 | -2.57121900 | 1.82557400  |
| H  | -1.44336700 | -3.31685700 | 1.92799800  |
| H  | 0.23616300  | -3.06478100 | 1.42271600  |
| H  | -0.39134800 | -2.19754100 | 2.82019100  |
| C  | -1.70299400 | 1.47650200  | 2.25086000  |
| H  | -2.27613700 | 0.60881400  | 2.59265600  |
| H  | -1.01436000 | 1.75467800  | 3.05565900  |
| H  | -2.39875600 | 2.30527200  | 2.10259500  |
| O  | 0.86150500  | -0.34249700 | 1.73842000  |
| H  | 0.36269200  | -0.29701600 | -0.28221500 |
| C  | 1.50192700  | 0.76672200  | 2.40662600  |
| H  | 1.10992400  | 0.82794500  | 3.42553100  |
| H  | 2.56384700  | 0.52410600  | 2.43803300  |
| H  | 1.33852800  | 1.70974100  | 1.88425000  |
| O  | 1.13612200  | -0.27139400 | -1.17864000 |
| C  | 2.38341300  | -0.32100600 | -0.81939800 |
| C  | 3.16715200  | 0.88479700  | -0.76496800 |
| C  | 3.04970400  | -1.57792500 | -0.54992200 |
| C  | 4.51054900  | 0.85431200  | -0.43552100 |
| C  | 4.37516400  | -1.62466800 | -0.20927000 |
| C  | 5.20210000  | -0.40891100 | -0.10915200 |
| O  | 6.39238700  | -0.42846400 | 0.20476200  |
| Cl | 2.09130100  | -3.00879600 | -0.71898000 |
| Cl | 5.19302400  | -3.11654300 | 0.10766400  |
| C  | 2.52836100  | 2.12103700  | -1.09944200 |
| C  | 5.30017900  | 2.03944800  | -0.40680300 |
| N  | 2.01716400  | 3.12999900  | -1.36889600 |
| N  | 5.94684100  | 3.00676200  | -0.38031100 |
| H  | -6.67173400 | -2.71848700 | 0.29227600  |
| H  | -3.79625700 | -5.74131800 | -0.73398500 |
| H  | -4.12220000 | 4.61331700  | -2.27317100 |
| H  | -1.71505700 | 6.44925100  | 0.77776500  |
| C  | -4.94750300 | -0.74795200 | 0.62355100  |
| C  | -1.67090300 | -4.23055300 | -0.64468400 |
| C  | -3.07667600 | 2.18328100  | -2.06496800 |
| C  | -0.29587200 | 4.31486800  | 1.39551900  |
| N  | -5.22995100 | 0.33940300  | 0.92602000  |
| N  | -0.62532000 | -4.64322000 | -0.94342600 |
| N  | 0.55282600  | 4.30726100  | 2.19121500  |
| N  | -3.39150100 | 1.25078600  | -2.68551900 |

**ortho-CN-Ph (2\_A)**

E(B3LYP/BS1) = -2704.667107 au

H(B3LYP/BS1) = -2704.20015 au

G(B3LYP/BS1) = -2704.317153 au  
E(M06-2X/BS2//B3LYP/BS1) = -2704.545791 au

|    |             |             |             |
|----|-------------|-------------|-------------|
| C  | -0.49185600 | -0.30758900 | 1.68798400  |
| C  | -1.80083600 | -0.89021700 | 1.09940600  |
| C  | -0.03829100 | 1.05431800  | 1.12466300  |
| C  | -2.68114300 | -0.06910300 | 0.49994100  |
| H  | -2.40483900 | 0.96977300  | 0.35004800  |
| C  | 0.15760500  | 1.17159900  | -0.20418800 |
| H  | -0.07556000 | 0.31774900  | -0.83486500 |
| C  | -4.07876400 | -0.36859100 | 0.11836000  |
| C  | -4.47252100 | -1.39019300 | -0.77338500 |
| C  | -5.11061200 | 0.45327000  | 0.63459800  |
| C  | -5.82553000 | -1.59753500 | -1.10128400 |
| C  | -6.45820500 | 0.24727300  | 0.30416700  |
| C  | -6.81438800 | -0.78412100 | -0.56056400 |
| H  | -6.08556800 | -2.39378400 | -1.79034600 |
| H  | -7.21609100 | 0.89502500  | 0.73126800  |
| H  | -7.85531700 | -0.94633800 | -0.81763500 |
| C  | 0.55254100  | 2.37535900  | -0.96536700 |
| C  | 1.69572600  | 3.15731300  | -0.68349600 |
| C  | -0.21451800 | 2.75852000  | -2.09352500 |
| C  | 2.02406200  | 4.28323000  | -1.46114400 |
| C  | 0.11646300  | 3.88033600  | -2.86771500 |
| C  | 1.23283600  | 4.64680600  | -2.54440900 |
| H  | 2.91006800  | 4.85678900  | -1.21145100 |
| H  | -0.50605500 | 4.14418300  | -3.71576900 |
| H  | 1.49051700  | 5.51481800  | -3.14105700 |
| C  | -2.09762900 | -2.31049300 | 1.50977400  |
| H  | -3.16202600 | -2.53716400 | 1.41552800  |
| H  | -1.53969600 | -3.03007200 | 0.90531100  |
| H  | -1.80753900 | -2.46021600 | 2.55322100  |
| C  | 0.04104700  | 2.20413400  | 2.09476500  |
| H  | -0.81696400 | 2.17704100  | 2.77194300  |
| H  | 0.94695400  | 2.16604800  | 2.70964000  |
| H  | 0.03930900  | 3.16163300  | 1.56952200  |
| O  | -0.83859300 | -0.24981200 | 3.04280600  |
| H  | 5.01779800  | -1.82967000 | -2.45724000 |
| C  | 0.12434800  | -0.34869900 | 4.09867600  |
| H  | 0.66142500  | -1.29735700 | 4.05169800  |
| H  | 0.83699000  | 0.47740300  | 4.09448400  |
| H  | -0.46932600 | -0.30795200 | 5.01395300  |
| O  | 5.17933100  | -1.47395500 | -1.56367900 |
| C  | 4.04150900  | -1.45048400 | -0.85446100 |
| C  | 4.10420900  | -0.97795100 | 0.46411500  |
| C  | 2.79848600  | -1.88359900 | -1.34918700 |
| C  | 2.93643300  | -0.91836700 | 1.26399500  |
| C  | 1.64624500  | -1.82511100 | -0.55881600 |
| C  | 1.68235800  | -1.31041800 | 0.75973500  |
| O  | 0.58786800  | -1.34474900 | 1.56948300  |
| Cl | 2.75499000  | -2.50073100 | -2.97660600 |
| Cl | 0.14917200  | -2.40086000 | -1.20356300 |

|   |             |             |             |
|---|-------------|-------------|-------------|
| C | 5.36833200  | -0.56314700 | 0.98222100  |
| C | 3.09819800  | -0.49236000 | 2.61825000  |
| N | 6.40019500  | -0.22779700 | 1.40111400  |
| N | 3.31524800  | -0.16335300 | 3.71193000  |
| C | -3.50327900 | -2.22433000 | -1.42087400 |
| C | -4.78024500 | 1.51625300  | 1.54018300  |
| C | 2.60222300  | 2.79721900  | 0.36659300  |
| C | -1.37631000 | 1.99899800  | -2.45620400 |
| N | -2.76362600 | -2.92305300 | -1.98479600 |
| N | -4.52830100 | 2.38272300  | 2.27467300  |
| N | 3.37725100  | 2.54006900  | 1.19525700  |
| N | -2.32000600 | 1.39188900  | -2.76405100 |

**ortho-Cl-Ph (TS\_A)**

E(B3LYP/BS1) = -4174.004808 au

H(B3LYP/BS1) = -4173.580957 au

G(B3LYP/BS1) = -4173.692836 au

E(M06-2X/BS2//B3LYP/BS1) = -4173.889607 au

|   |             |             |             |
|---|-------------|-------------|-------------|
| C | 0.83389300  | 0.74248400  | -1.79997500 |
| C | 2.07487100  | -0.05164600 | -1.50607300 |
| C | 0.20437500  | 1.57700500  | -0.74217800 |
| C | 2.85947400  | 0.31855700  | -0.46556700 |
| H | 2.54535700  | 1.16386600  | 0.13854800  |
| C | -0.17851900 | 0.94278400  | 0.40484200  |
| H | 0.05743300  | -0.11451200 | 0.49080800  |
| C | 4.19803600  | -0.20626000 | -0.12399600 |
| C | 4.46942900  | -1.53391500 | 0.26457100  |
| C | 5.30283600  | 0.67264500  | -0.10849200 |
| C | 5.74935100  | -1.96515900 | 0.61064700  |
| C | 6.58930100  | 0.26837400  | 0.23106300  |
| C | 6.80856100  | -1.06154800 | 0.58795000  |
| H | 7.80708600  | -1.39164500 | 0.85622300  |
| C | -0.74115000 | 1.53365000  | 1.63155300  |
| C | -1.89704800 | 2.34404100  | 1.69633000  |
| C | -0.13714000 | 1.24062400  | 2.87850300  |
| C | -2.38368300 | 2.86061900  | 2.89616000  |
| C | -0.60337900 | 1.74602000  | 4.08620200  |
| C | -1.73006500 | 2.56662000  | 4.08913800  |
| H | -2.10593900 | 2.96714300  | 5.02508200  |
| C | 2.43603400  | -1.11147000 | -2.51390500 |
| H | 3.47911600  | -1.41797400 | -2.41741100 |
| H | 1.80538000  | -1.99790600 | -2.37925000 |
| H | 2.27297600  | -0.73829600 | -3.52882500 |
| C | 0.12630000  | 3.06627700  | -0.96352300 |
| H | 0.98941600  | 3.39825400  | -1.54842400 |
| H | -0.77658200 | 3.37416300  | -1.49896400 |
| H | 0.12388200  | 3.58936100  | -0.00377400 |
| O | 0.95860200  | 1.27558100  | -3.06113200 |
| H | -0.13949600 | -0.25150500 | -1.94649400 |
| C | -0.19498800 | 1.65324700  | -3.83085700 |
| H | 0.18547000  | 2.28315500  | -4.63572500 |
| H | -0.66159000 | 0.75677000  | -4.24613600 |

|    |             |             |             |
|----|-------------|-------------|-------------|
| H  | -0.92532700 | 2.20738400  | -3.24122600 |
| O  | -0.97074700 | -1.09275100 | -2.22169400 |
| C  | -1.93476100 | -1.25621800 | -1.36618800 |
| C  | -1.81768200 | -2.24852000 | -0.32894900 |
| C  | -3.19620000 | -0.55113400 | -1.47572500 |
| C  | -2.83883700 | -2.47675800 | 0.57852300  |
| C  | -4.21767900 | -0.76743100 | -0.58855400 |
| C  | -4.09852300 | -1.71521400 | 0.53376900  |
| O  | -4.99431600 | -1.89356100 | 1.36085500  |
| Cl | -3.38637700 | 0.52786100  | -2.82020600 |
| Cl | -5.74159700 | 0.04203300  | -0.72061200 |
| C  | -0.64688400 | -3.07017300 | -0.31592100 |
| C  | -2.73016500 | -3.47335200 | 1.58996500  |
| N  | 0.27034100  | -3.78465200 | -0.30986500 |
| N  | -2.64249200 | -4.28436500 | 2.42037900  |
| H  | 7.40406600  | 0.98316200  | 0.21201900  |
| H  | 5.90518100  | -2.99680000 | 0.90519200  |
| H  | -0.08831800 | 1.50187500  | 5.00811200  |
| H  | -3.27728400 | 3.47401800  | 2.88962200  |
| Cl | 3.15953500  | -2.69506800 | 0.38123700  |
| Cl | 5.06563000  | 2.35794600  | -0.56590000 |
| Cl | -2.85002200 | 2.67191800  | 0.25763600  |
| Cl | 1.29526500  | 0.21963700  | 2.92825200  |

#### ortho-Cl-Ph (2\_A)

E(B3LYP/BS1) = -4174.06279 au

H(B3LYP/BS1) = -4173.63113 au

G(B3LYP/BS1) = -4173.744137 au

E(M06-2X/BS2//B3LYP/BS1) = -4173.980627 au

|   |             |             |             |
|---|-------------|-------------|-------------|
| C | -0.42588400 | 0.53370200  | 1.76652000  |
| C | -1.82522900 | 0.01975500  | 1.38961700  |
| C | 0.14273000  | 1.58484500  | 0.79603400  |
| C | -2.38356200 | 0.32027400  | 0.20617200  |
| H | -1.79802200 | 0.84559200  | -0.54358000 |
| C | 0.89174200  | 1.28366500  | -0.27868200 |
| H | 1.11131700  | 0.24750500  | -0.50895700 |
| C | -3.77610000 | -0.00189100 | -0.20090000 |
| C | -4.04805200 | -0.85183200 | -1.29148300 |
| C | -4.91014000 | 0.57480900  | 0.40704200  |
| C | -5.33731900 | -1.15077000 | -1.72424400 |
| C | -6.21335000 | 0.29522900  | -0.00261700 |
| C | -6.42361000 | -0.57687100 | -1.06738900 |
| H | -5.48367800 | -1.82290600 | -2.56217800 |
| H | -7.04862800 | 0.76541900  | 0.50377900  |
| H | -7.43449400 | -0.80140700 | -1.39254900 |
| C | 1.42008500  | 2.23654200  | -1.28894100 |
| C | 2.32496500  | 3.28154200  | -1.01156700 |
| C | 1.08363800  | 2.07898100  | -2.64983900 |
| C | 2.82981200  | 4.12366900  | -2.00249700 |
| C | 1.57204100  | 2.90178000  | -3.65981000 |
| C | 2.44782800  | 3.93340600  | -3.32737400 |
| H | 3.52240300  | 4.91272600  | -1.73257400 |

|    |             |             |             |
|----|-------------|-------------|-------------|
| H  | 1.26671600  | 2.73718400  | -4.68691400 |
| H  | 2.83743200  | 4.58533900  | -4.10266000 |
| C  | -2.52449900 | -0.75494300 | 2.47908800  |
| H  | -3.35828800 | -1.33341300 | 2.07357500  |
| H  | -1.82866700 | -1.44122200 | 2.96792100  |
| H  | -2.91478400 | -0.08105400 | 3.24795100  |
| C  | -0.36759600 | 2.98348900  | 1.06782100  |
| H  | -1.43984100 | 2.95806700  | 1.28463500  |
| H  | 0.12479700  | 3.44680300  | 1.92817700  |
| H  | -0.20615500 | 3.62779300  | 0.20121900  |
| O  | -0.61662600 | 1.07633600  | 3.03438400  |
| H  | 3.73252400  | -4.23458800 | -1.47978900 |
| C  | 0.52873600  | 1.47060800  | 3.80060200  |
| H  | 1.02480900  | 0.59528600  | 4.22566600  |
| H  | 1.24952800  | 2.03753800  | 3.20622000  |
| H  | 0.13819100  | 2.10080400  | 4.60190900  |
| O  | 4.14091100  | -3.49722700 | -0.98927900 |
| C  | 3.21526600  | -2.84608200 | -0.26851000 |
| C  | 3.64279500  | -1.76958000 | 0.52276200  |
| C  | 1.85384200  | -3.20056300 | -0.23884100 |
| C  | 2.70899900  | -1.03059400 | 1.28894500  |
| C  | 0.93301400  | -2.47702000 | 0.52695300  |
| C  | 1.33260200  | -1.33073400 | 1.25752900  |
| O  | 0.47186100  | -0.65708700 | 2.05389900  |
| Cl | 1.37034300  | -4.59028300 | -1.17033800 |
| Cl | -0.70134600 | -3.02698700 | 0.63753700  |
| C  | 5.03173800  | -1.44085300 | 0.54596900  |
| C  | 3.20638500  | -0.00010900 | 2.14447400  |
| N  | 6.16306400  | -1.17111800 | 0.56530700  |
| N  | 3.67532200  | 0.79654700  | 2.84985100  |
| Cl | -2.70858900 | -1.59007200 | -2.16591900 |
| Cl | -4.72257400 | 1.74929000  | 1.70936300  |
| Cl | -0.02812600 | 0.79194100  | -3.11074100 |
| Cl | 2.91274600  | 3.54597100  | 0.62650900  |

**ortho-Me-Ph (TS\_A)**

E(B3LYP/BS1) = -2492.901086 au

H(B3LYP/BS1) = -2492.324119 au

G(B3LYP/BS1) = -2492.439458 au

E(M06-2X/BS2//B3LYP/BS1) = -2492.715334 au

|   |             |             |             |
|---|-------------|-------------|-------------|
| C | 1.04706500  | 1.84492400  | 0.36723400  |
| C | 2.27736500  | 1.33972800  | -0.33388900 |
| C | 0.37620200  | 1.01937700  | 1.39801900  |
| C | 3.06733600  | 0.43020800  | 0.29391700  |
| H | 2.73907300  | 0.09938200  | 1.27678800  |
| C | -0.02227800 | -0.24225500 | 1.02470900  |
| H | 0.26979700  | -0.54142800 | 0.02124800  |
| C | 4.40657600  | -0.05078600 | -0.10255100 |
| C | 4.67009300  | -0.70617800 | -1.33011000 |
| C | 5.45328100  | 0.12291800  | 0.84610600  |
| C | 5.97585100  | -1.14115300 | -1.59754100 |
| C | 6.74050300  | -0.31531600 | 0.53318800  |

|    |             |             |             |
|----|-------------|-------------|-------------|
| C  | 7.00674500  | -0.94214200 | -0.68518500 |
| H  | 8.01211600  | -1.28548500 | -0.91374000 |
| C  | -0.64138100 | -1.31132300 | 1.81601900  |
| C  | -1.76104200 | -1.12436400 | 2.67239400  |
| C  | -0.09060100 | -2.62173800 | 1.65779100  |
| C  | -2.25249400 | -2.22032100 | 3.39377900  |
| C  | -0.60712400 | -3.67656100 | 2.40756500  |
| C  | -1.67794000 | -3.48085000 | 3.28127800  |
| H  | -2.07469000 | -4.31502900 | 3.85317100  |
| C  | 2.64083400  | 2.04374700  | -1.61571300 |
| H  | 3.69742500  | 1.91052600  | -1.85668200 |
| H  | 2.04555700  | 1.66035000  | -2.45331300 |
| H  | 2.43450300  | 3.11457700  | -1.52935200 |
| C  | 0.27013800  | 1.57232900  | 2.79604900  |
| H  | 1.14132000  | 2.19974000  | 3.00811700  |
| H  | -0.61961500 | 2.18882400  | 2.95778700  |
| H  | 0.23297200  | 0.75404200  | 3.51961500  |
| O  | 1.23453400  | 3.18981000  | 0.63482300  |
| H  | 0.09982200  | 1.81542600  | -0.62102100 |
| C  | 0.11271300  | 4.07631000  | 0.76369000  |
| H  | 0.53468000  | 5.03260400  | 1.07569500  |
| H  | -0.38663800 | 4.18565400  | -0.20198400 |
| H  | -0.60616900 | 3.73352800  | 1.51025100  |
| O  | -0.75326000 | 1.88426000  | -1.52633500 |
| C  | -1.72229900 | 1.02582100  | -1.43832100 |
| C  | -1.62588500 | -0.24857600 | -2.10096300 |
| C  | -2.97441800 | 1.33245500  | -0.77493100 |
| C  | -2.65062700 | -1.18108600 | -2.04717300 |
| C  | -3.99882100 | 0.42370600  | -0.71423000 |
| C  | -3.89677600 | -0.92060100 | -1.30988000 |
| O  | -4.79662300 | -1.76017500 | -1.23276900 |
| Cl | -3.14595900 | 2.92814200  | -0.11055700 |
| Cl | -5.50894300 | 0.78561000  | 0.05412700  |
| C  | -0.46541200 | -0.49662000 | -2.89999400 |
| C  | -2.55417200 | -2.43308800 | -2.71870100 |
| N  | 0.44976000  | -0.70121900 | -3.58781500 |
| N  | -2.47499400 | -3.45903700 | -3.26328900 |
| H  | 7.54173400  | -0.16492900 | 1.25222900  |
| H  | 6.17512200  | -1.65531400 | -2.53463700 |
| H  | -0.16839900 | -4.66504100 | 2.30266100  |
| H  | -3.11516000 | -2.07588800 | 4.03922000  |
| C  | 5.19849200  | 0.79777300  | 2.17518700  |
| H  | 4.76309800  | 1.79592400  | 2.04988400  |
| H  | 4.49874500  | 0.22271900  | 2.79631900  |
| H  | 6.12920700  | 0.90256600  | 2.74007700  |
| C  | 3.59275300  | -1.00339100 | -2.34624800 |
| H  | 2.60371300  | -1.08431200 | -1.89195400 |
| H  | 3.52887300  | -0.22203900 | -3.11304500 |
| H  | 3.80701800  | -1.94305300 | -2.86576100 |
| C  | 1.06359400  | -2.89302200 | 0.71947900  |
| H  | 0.79827700  | -2.68601800 | -0.32529000 |



|   |             |             |            |
|---|-------------|-------------|------------|
| H | 1.94278000  | -2.28274600 | 0.95338700 |
| H | 1.36167700  | -3.94335900 | 0.77665400 |
| C | -2.51895700 | 0.17763500  | 2.79705100 |
| H | -2.27495900 | 0.70001500  | 3.72986000 |
| H | -2.31915900 | 0.85953200  | 1.97034400 |
| H | -3.59583300 | -0.01929300 | 2.81660700 |

**ortho-Me-Ph (2\_A)**

E(B3LYP/BS1) = -2492.953613 au

H(B3LYP/BS1) = -2492.369999 au

G(B3LYP/BS1) = -2492.482917 au

E(M06-2X/BS2//B3LYP/BS1) = -2492.800149 au

|   |             |             |             |
|---|-------------|-------------|-------------|
| C | -0.61959500 | 0.59572700  | 1.68238400  |
| C | -2.00482600 | 0.07894100  | 1.27070100  |
| C | -0.03973000 | 1.70460700  | 0.78800700  |
| C | -2.56933100 | 0.42688000  | 0.10024200  |
| H | -1.96934200 | 1.00341000  | -0.60193700 |
| C | 0.79933200  | 1.48935400  | -0.24347200 |
| H | 1.05508600  | 0.46436400  | -0.48935200 |
| C | -3.94541800 | 0.09391100  | -0.36243000 |
| C | -4.09979400 | -0.62233500 | -1.57765200 |
| C | -5.09513000 | 0.53524500  | 0.33655600  |
| C | -5.38179700 | -0.93671800 | -2.03622600 |
| C | -6.36514700 | 0.20904500  | -0.16382400 |
| C | -6.51499100 | -0.53075000 | -1.33153400 |
| H | -5.49018200 | -1.50230200 | -2.95863600 |
| H | -7.24504000 | 0.55362900  | 0.37468400  |
| H | -7.50704900 | -0.77765200 | -1.70056100 |
| C | 1.39467500  | 2.48703200  | -1.17302600 |
| C | 2.16327300  | 3.59275500  | -0.73313300 |
| C | 1.24367700  | 2.25257400  | -2.56621100 |
| C | 2.71193900  | 4.46231500  | -1.68885200 |
| C | 1.80020500  | 3.14636800  | -3.48352600 |
| C | 2.52696200  | 4.25558100  | -3.05101600 |
| H | 3.30454300  | 5.30752200  | -1.34678300 |
| H | 1.66442200  | 2.96693400  | -4.54719700 |
| H | 2.95979200  | 4.94260300  | -3.77335100 |
| C | -2.68475800 | -0.77647500 | 2.31247100  |
| H | -3.51922100 | -1.33025000 | 1.87540900  |
| H | -1.97731800 | -1.48994500 | 2.74251500  |
| H | -3.06770200 | -0.16769300 | 3.13774300  |
| C | -0.63218500 | 3.06640500  | 1.08700700  |
| H | -1.71519800 | 2.98678800  | 1.22286700  |
| H | -0.23142200 | 3.51222000  | 2.00331000  |
| H | -0.43954000 | 3.75447700  | 0.26127800  |
| O | -0.82318400 | 1.06029400  | 2.98091200  |
| H | 3.61997500  | -4.07379200 | -1.67046100 |
| C | 0.30736500  | 1.44532900  | 3.77029200  |
| H | 0.84877800  | 0.56453100  | 4.12240000  |
| H | 0.99561100  | 2.09301200  | 3.22103800  |
| H | -0.10544200 | 1.99066700  | 4.62133100  |
| O | 4.01959900  | -3.35415400 | -1.14761500 |

|    |             |             |             |
|----|-------------|-------------|-------------|
| C  | 3.07973900  | -2.72307200 | -0.42653100 |
| C  | 3.49131400  | -1.67200800 | 0.40553700  |
| C  | 1.71671900  | -3.07230400 | -0.43823100 |
| C  | 2.54236900  | -0.95646700 | 1.17508300  |
| C  | 0.78102000  | -2.37214900 | 0.33144700  |
| C  | 1.16491800  | -1.25323400 | 1.11294400  |
| O  | 0.29761200  | -0.60853100 | 1.92057300  |
| Cl | 1.25007100  | -4.42696700 | -1.42885800 |
| Cl | -0.85736000 | -2.92451600 | 0.38179000  |
| C  | 4.87929300  | -1.34349300 | 0.46498400  |
| C  | 3.02010000  | 0.06466000  | 2.05207500  |
| N  | 6.00971900  | -1.07378000 | 0.51446000  |
| N  | 3.47096400  | 0.86459200  | 2.76603500  |
| C  | 0.48008000  | 1.05244900  | -3.07639000 |
| H  | 0.95422200  | 0.10819900  | -2.77734400 |
| H  | -0.54362600 | 1.02714400  | -2.68799700 |
| H  | 0.42561500  | 1.06217100  | -4.16890100 |
| C  | 2.46692500  | 3.86773800  | 0.72307000  |
| H  | 1.71829600  | 4.52715300  | 1.17897900  |
| H  | 2.50236400  | 2.95225400  | 1.31800100  |
| H  | 3.43437300  | 4.37161700  | 0.81740000  |
| C  | -5.02599300 | 1.38132700  | 1.58943400  |
| H  | -5.07572200 | 0.76617500  | 2.49649600  |
| H  | -4.10316500 | 1.96406100  | 1.64469300  |
| H  | -5.87317800 | 2.07415300  | 1.62670800  |
| C  | -2.90074100 | -1.04184000 | -2.39670500 |
| H  | -2.43093800 | -0.17651300 | -2.88267400 |
| H  | -2.13060000 | -1.52260500 | -1.78646100 |
| H  | -3.19427200 | -1.73804600 | -3.18833000 |

### ortho-NH<sub>2</sub>-Ph (TS\_A)

E(B3LYP/BS1) = -2557.074 au

H(B3LYP/BS1) = -2556.542438 au

G(B3LYP/BS1) = -2556.655328 au

E(M06-2X/BS2//B3LYP/BS1) = -2556.934362 au

|   |             |             |             |
|---|-------------|-------------|-------------|
| C | 1.04173300  | 1.99818600  | 0.28743500  |
| C | 2.31313300  | 1.47611700  | -0.31115000 |
| C | 0.32304500  | 1.23432000  | 1.32813800  |
| C | 3.03309500  | 0.52829900  | 0.36033400  |
| H | 2.62145600  | 0.23041700  | 1.32597600  |
| C | -0.05845000 | -0.05829200 | 1.01158500  |
| H | 0.32796500  | -0.42885700 | 0.06478900  |
| C | 4.33133100  | -0.05744600 | 0.04440800  |
| C | 4.65862300  | -0.63575700 | -1.22245000 |
| C | 5.30030100  | -0.13465400 | 1.09786800  |
| C | 5.91678500  | -1.23159400 | -1.41641100 |
| C | 6.54120600  | -0.75168800 | 0.87827800  |
| C | 6.83511200  | -1.28478200 | -0.37320000 |
| H | 7.79909900  | -1.75986900 | -0.53670800 |
| C | -0.79097100 | -1.05523900 | 1.75709200  |
| C | -1.96870700 | -0.79514800 | 2.53645600  |

|    |             |             |             |
|----|-------------|-------------|-------------|
| C  | -0.37302200 | -2.42364800 | 1.59860000  |
| C  | -2.63147800 | -1.85454300 | 3.17629500  |
| C  | -1.06799700 | -3.45657700 | 2.23520900  |
| C  | -2.18097300 | -3.16009600 | 3.01988100  |
| H  | -2.71248100 | -3.96796500 | 3.51547500  |
| C  | 2.79520800  | 2.18406700  | -1.55149000 |
| H  | 3.87315200  | 2.06885700  | -1.67786600 |
| H  | 2.30950400  | 1.79074600  | -2.45285300 |
| H  | 2.55667700  | 3.24895500  | -1.48428000 |
| C  | 0.14065400  | 1.87565700  | 2.68026800  |
| H  | 0.99929600  | 2.52247300  | 2.88561500  |
| H  | -0.75733500 | 2.49621000  | 2.76849600  |
| H  | 0.06814700  | 1.10670800  | 3.45252500  |
| O  | 1.19053600  | 3.36616000  | 0.50754500  |
| H  | 0.17284500  | 1.88982600  | -0.73259000 |
| C  | 0.04286700  | 4.22270300  | 0.44251900  |
| H  | 0.40909600  | 5.21968600  | 0.69294600  |
| H  | -0.37451300 | 4.22188500  | -0.56782100 |
| H  | -0.73326600 | 3.93282200  | 1.15535200  |
| O  | -0.67400400 | 1.83773400  | -1.69270200 |
| C  | -1.59100100 | 0.93320500  | -1.53741800 |
| C  | -1.39251300 | -0.40341600 | -2.02596900 |
| C  | -2.88028700 | 1.22341300  | -0.94158300 |
| C  | -2.35278800 | -1.39753600 | -1.87378700 |
| C  | -3.84422600 | 0.25794000  | -0.79364800 |
| C  | -3.64001100 | -1.13741300 | -1.21809100 |
| O  | -4.49079700 | -2.01992400 | -1.06421000 |
| Cl | -3.17419900 | 2.87172700  | -0.46387900 |
| Cl | -5.39184000 | 0.60394900  | -0.09015900 |
| C  | -0.17282600 | -0.67526600 | -2.72042900 |
| C  | -2.13653400 | -2.71783400 | -2.36031600 |
| N  | 0.80977700  | -0.90125600 | -3.30055200 |
| N  | -1.95731100 | -3.79918300 | -2.75360700 |
| H  | 7.27142300  | -0.78446400 | 1.68185700  |
| H  | 6.14997000  | -1.67270400 | -2.38149100 |
| H  | -0.72210100 | -4.48061200 | 2.13023100  |
| H  | -3.52159700 | -1.64484600 | 3.76214600  |
| N  | 3.75566600  | -0.62854100 | -2.26831700 |
| N  | 5.06738500  | 0.47536100  | 2.31932800  |
| N  | 0.71444400  | -2.71901200 | 0.78966500  |
| N  | -2.48521500 | 0.48142600  | 2.65215900  |
| H  | 1.49268200  | -2.07256500 | 0.79836100  |
| H  | 1.03101900  | -3.68022300 | 0.83476700  |
| H  | -2.27942300 | 1.12453000  | 1.89971200  |
| H  | -3.45681000 | 0.52852300  | 2.93495500  |
| H  | 3.92721900  | -1.31120400 | -2.99586200 |
| H  | 2.77141900  | -0.56195800 | -2.04555800 |
| H  | 5.59141200  | 0.11182300  | 3.10481300  |
| H  | 4.12085900  | 0.73415300  | 2.55931100  |

**ortho-NH<sub>2</sub>-Ph (2\_A)**

E(B3LYP/BS1) = -2557.117613 au

H(B3LYP/BS1) = -2556.579146 au  
 G(B3LYP/BS1) = -2556.689606 au  
 E(M06-2X/BS2//B3LYP/BS1) = -2557.014347 au

|    |             |             |             |
|----|-------------|-------------|-------------|
| C  | -0.62169300 | 0.08027200  | 1.80403100  |
| C  | -1.92974200 | -0.49852600 | 1.23531400  |
| C  | -0.11262400 | 1.35407300  | 1.12034200  |
| C  | -2.69728800 | 0.20805100  | 0.38288900  |
| H  | -2.33274000 | 1.18628800  | 0.06950400  |
| C  | 0.29671000  | 1.30121200  | -0.16741300 |
| H  | 0.23366600  | 0.33415400  | -0.66672500 |
| C  | -4.05070900 | -0.15215400 | -0.11416300 |
| C  | -4.28095900 | -1.26195600 | -0.96384300 |
| C  | -5.13702200 | 0.70434100  | 0.20021100  |
| C  | -5.57089800 | -1.51281100 | -1.46421800 |
| C  | -6.41952900 | 0.44151600  | -0.31088700 |
| C  | -6.62196100 | -0.66220200 | -1.13464500 |
| H  | -5.73270200 | -2.36869400 | -2.11441300 |
| H  | -7.24416400 | 1.10019000  | -0.05100200 |
| H  | -7.61499200 | -0.85971900 | -1.53097300 |
| C  | 0.72951600  | 2.39124800  | -1.06689500 |
| C  | 1.77545400  | 3.30497100  | -0.76858500 |
| C  | 0.12363200  | 2.44911100  | -2.35329800 |
| C  | 2.14378900  | 4.28179300  | -1.71402800 |
| C  | 0.51426300  | 3.42181400  | -3.28520200 |
| C  | 1.51668600  | 4.33035200  | -2.95321600 |
| H  | 2.94118700  | 4.97905200  | -1.47052000 |
| H  | 0.02409000  | 3.46423100  | -4.25420500 |
| H  | 1.81120800  | 5.09031000  | -3.67269200 |
| C  | -2.40934500 | -1.77608200 | 1.89085600  |
| H  | -3.18864300 | -1.54929300 | 2.62824200  |
| H  | -2.83624700 | -2.45666700 | 1.15012000  |
| H  | -1.59695700 | -2.28870400 | 2.40624900  |
| C  | -0.29706000 | 2.65062700  | 1.87456700  |
| H  | -1.23874300 | 2.63471700  | 2.43132200  |
| H  | 0.49279800  | 2.84467300  | 2.61180800  |
| H  | -0.31510500 | 3.49261300  | 1.17755400  |
| O  | -0.94642100 | 0.24145800  | 3.15130800  |
| H  | 4.58691200  | -2.72455400 | -2.14736900 |
| C  | 0.06557800  | 0.34937600  | 4.15946500  |
| H  | 0.69002100  | -0.54634100 | 4.18253100  |
| H  | 0.69770200  | 1.22940800  | 4.02689300  |
| H  | -0.48487400 | 0.43721900  | 5.09821600  |
| O  | 4.77452500  | -2.03661000 | -1.48225600 |
| C  | 3.69475200  | -1.81940800 | -0.71554400 |
| C  | 3.79734400  | -0.85642600 | 0.29812100  |
| C  | 2.47773400  | -2.51186800 | -0.86186100 |
| C  | 2.69030700  | -0.57796100 | 1.13779400  |
| C  | 1.38443200  | -2.22948600 | -0.03847600 |
| C  | 1.45556900  | -1.23349500 | 0.96742200  |
| O  | 0.42026500  | -1.04271500 | 1.80960800  |
| Cl | 2.39517000  | -3.73245500 | -2.10096700 |

|    |             |             |             |
|----|-------------|-------------|-------------|
| Cl | -0.08412800 | -3.12561800 | -0.22534900 |
| C  | 5.03575300  | -0.16768000 | 0.47037700  |
| C  | 2.87057800  | 0.36900400  | 2.19071100  |
| N  | 6.04407800  | 0.39464500  | 0.61205500  |
| N  | 3.07326600  | 1.13947100  | 3.03845100  |
| N  | -3.24174000 | -2.13899100 | -1.29075100 |
| N  | -4.96025500 | 1.77424400  | 1.08237000  |
| N  | 2.53474700  | 3.19105800  | 0.39222400  |
| N  | -0.83724000 | 1.49752500  | -2.71176500 |
| H  | 3.03989400  | 4.02817400  | 0.65616700  |
| H  | 2.10135400  | 2.75096400  | 1.18984300  |
| H  | -1.37380000 | 1.74611800  | -3.53516400 |
| H  | -1.45184200 | 1.19137400  | -1.96762700 |
| H  | -4.01264300 | 2.12025000  | 1.17040300  |
| H  | -5.61723800 | 2.53497700  | 0.95317900  |
| H  | -2.31400300 | -1.73596200 | -1.22405900 |
| H  | -3.36839900 | -2.61650500 | -2.17621500 |
